# Supplementary material for: BNP-Track: a framework for superresolved tracking
Source: PubMed Central journal article supplement (PMC11399105; doi:10.1038/s41592-024-02349-9), 2024-07-22

**Image frame 1**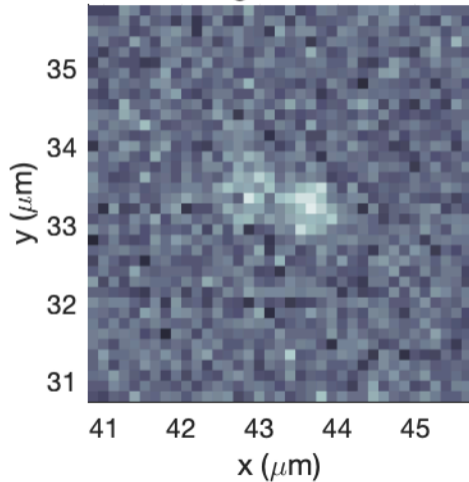**Horizontal line scans**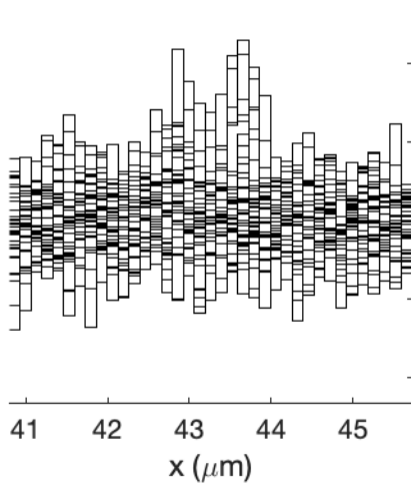**Vertical line scans**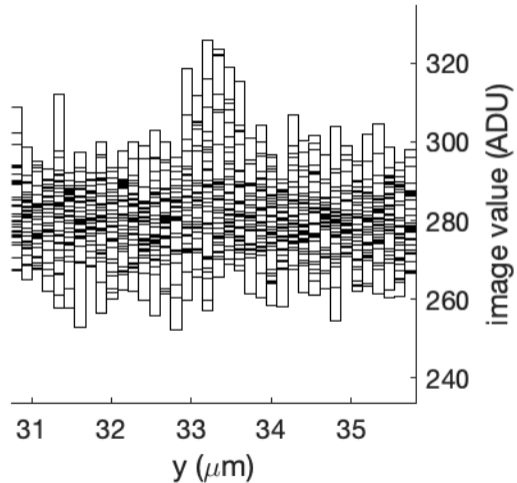

**Image frame 2**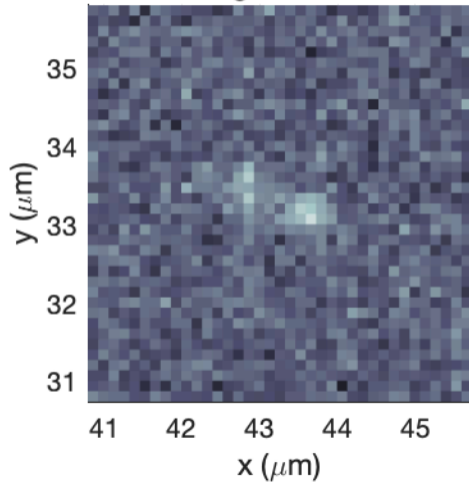**Horizontal line scans**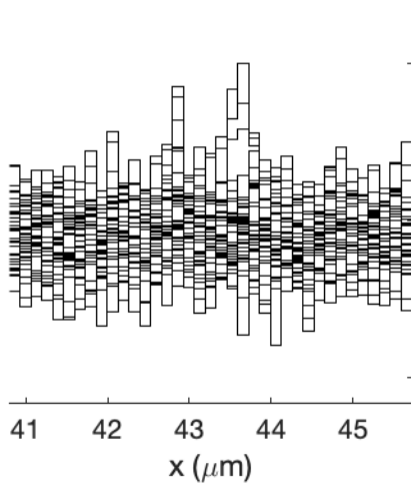**Vertical line scans**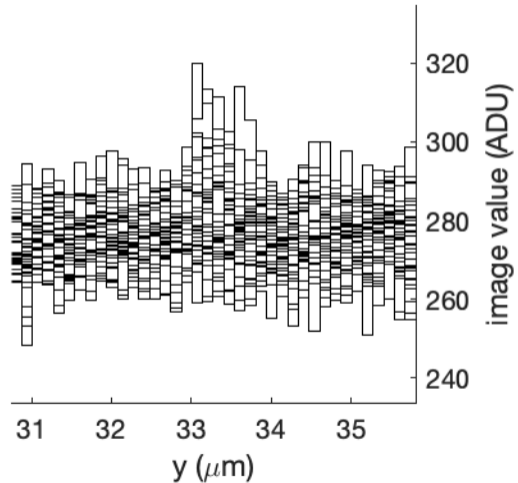

**Image frame 3**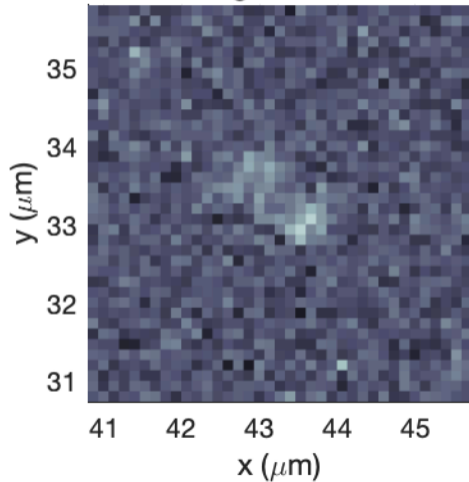**Horizontal line scans**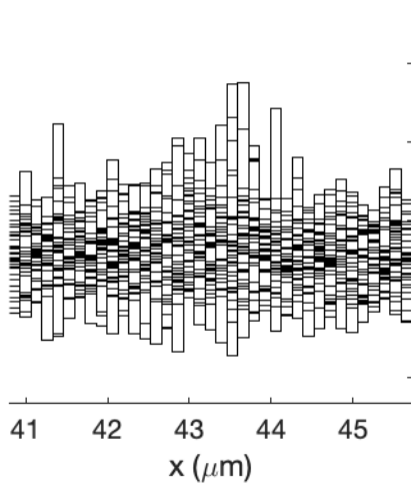**Vertical line scans**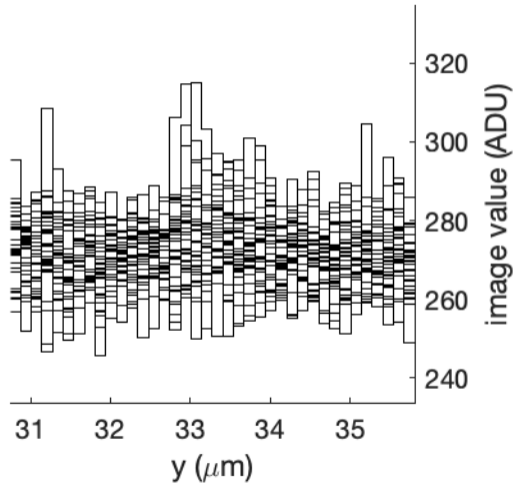

**Image frame 4**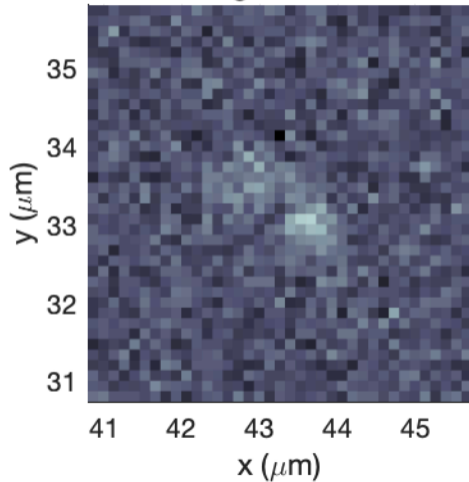**Horizontal line scans**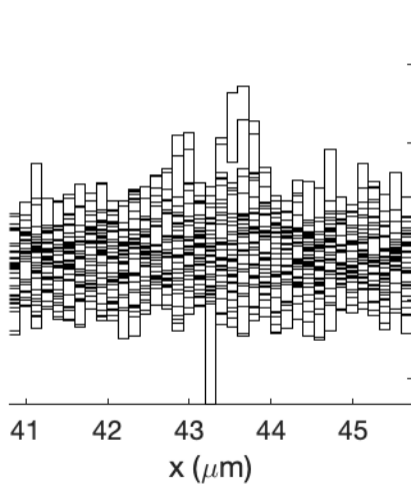**Vertical line scans**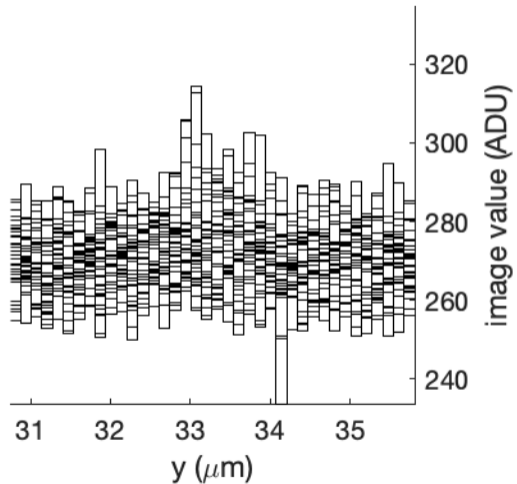

**Image frame 5**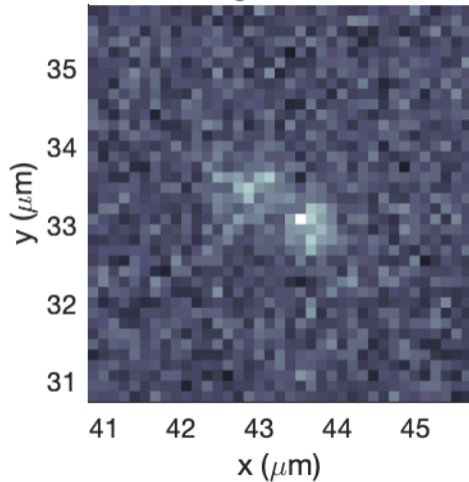**Horizontal line scans**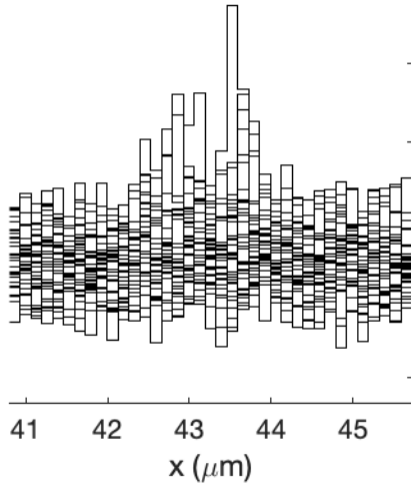**Vertical line scans**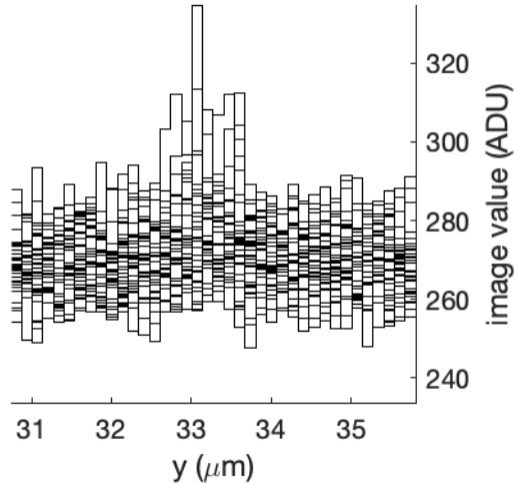

**Image frame 6**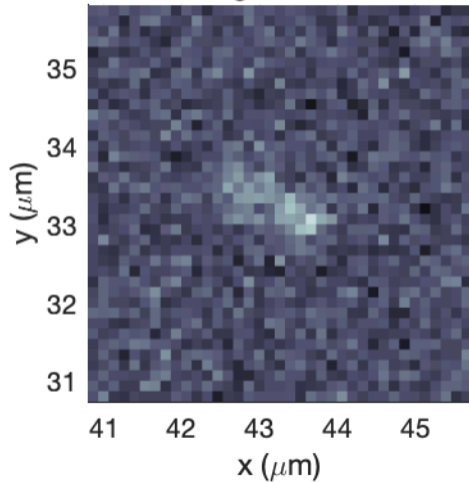**Horizontal line scans**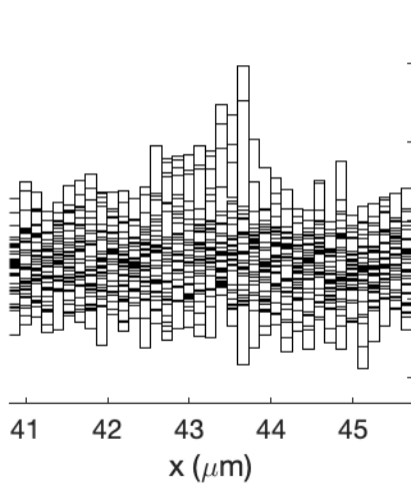**Vertical line scans**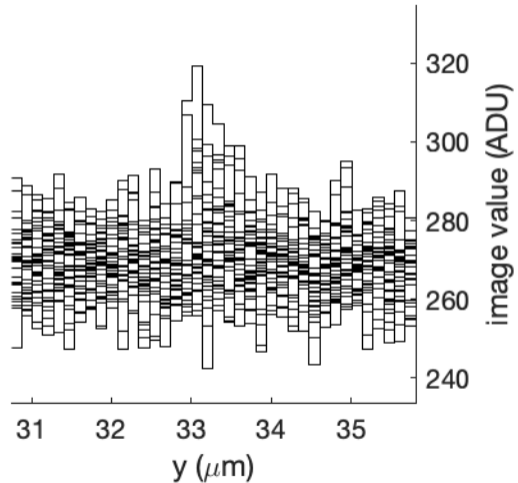

**Image frame 7**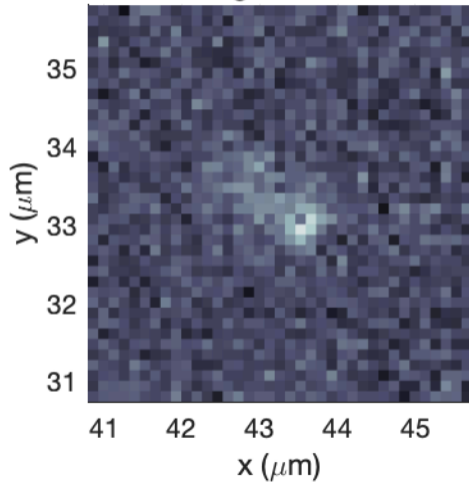**Horizontal line scans**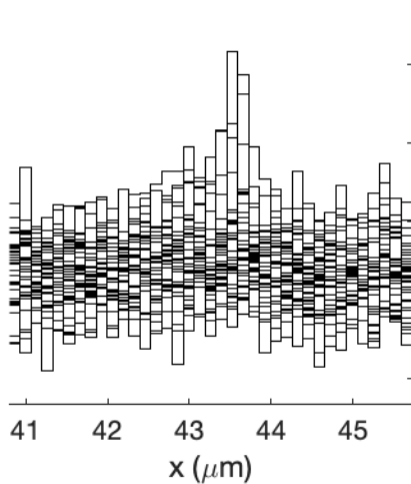**Vertical line scans**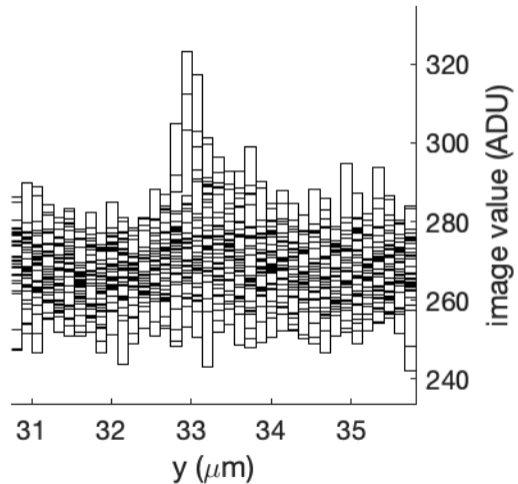

**Image frame 8**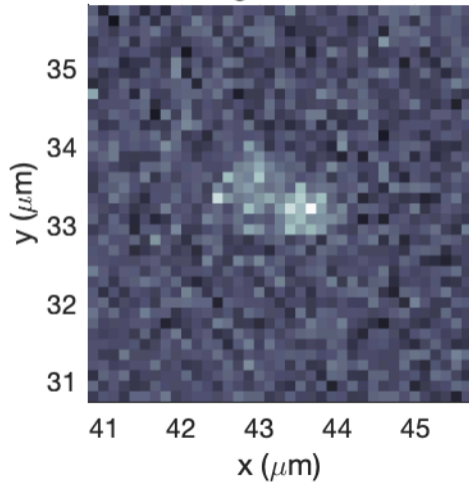**Horizontal line scans**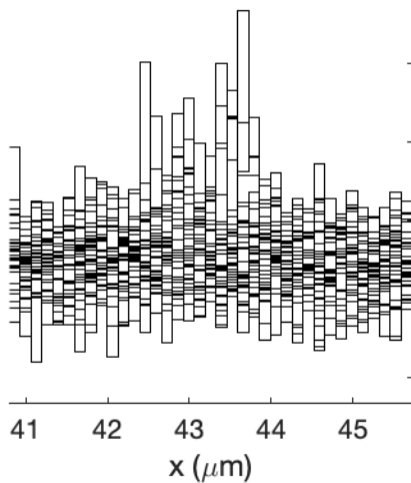**Vertical line scans**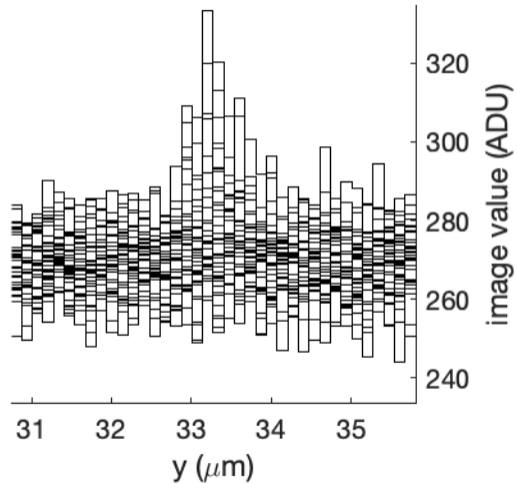



**Image frame 9**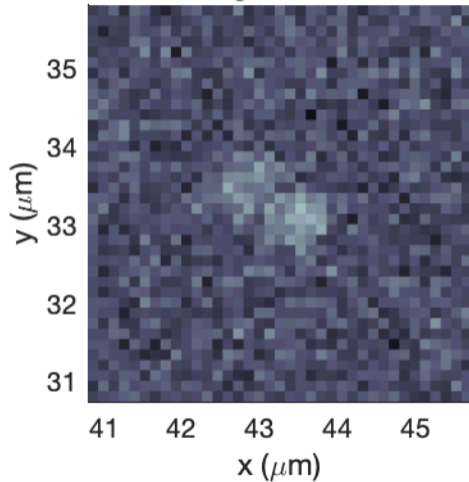**Horizontal line scans**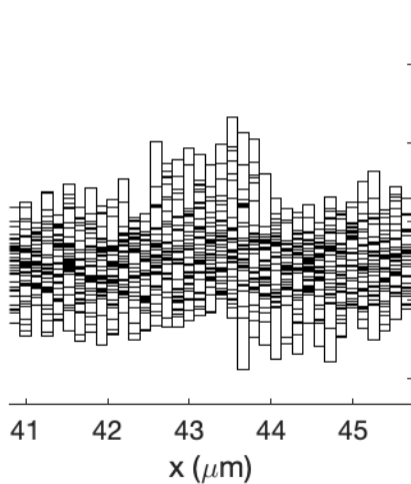**Vertical line scans**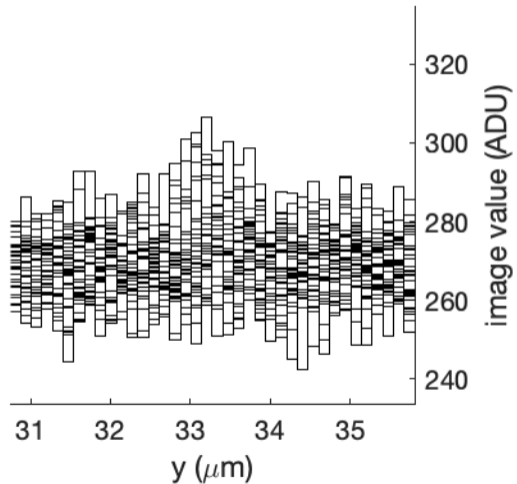

**Image frame 10**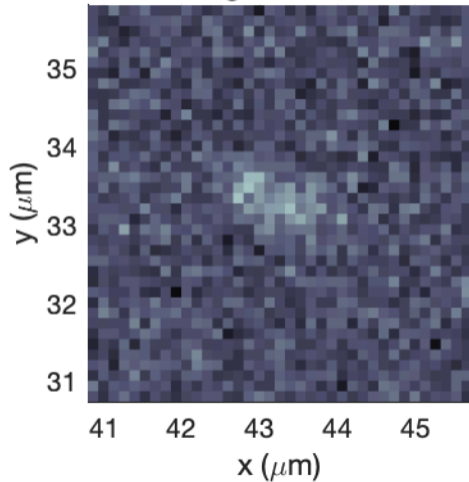**Horizontal line scans**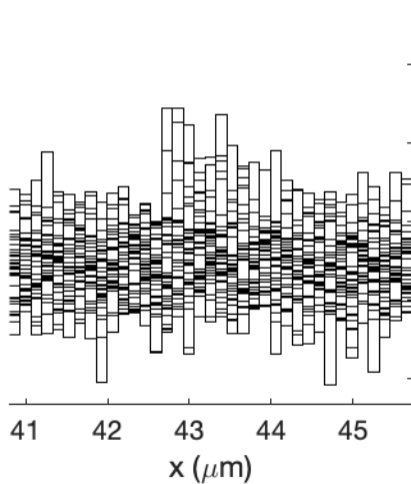**Vertical line scans**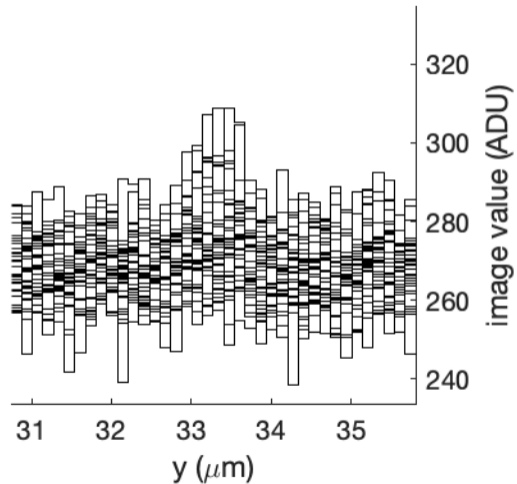

**Image frame 11**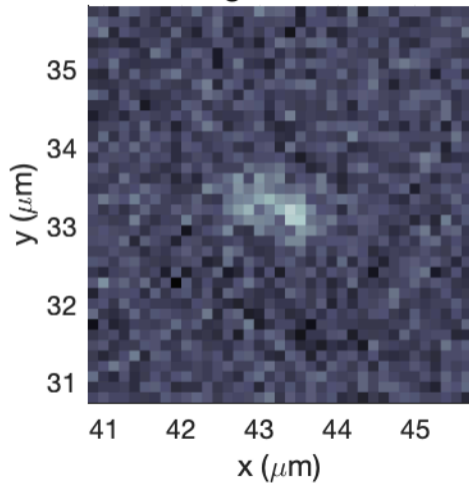**Horizontal line scans**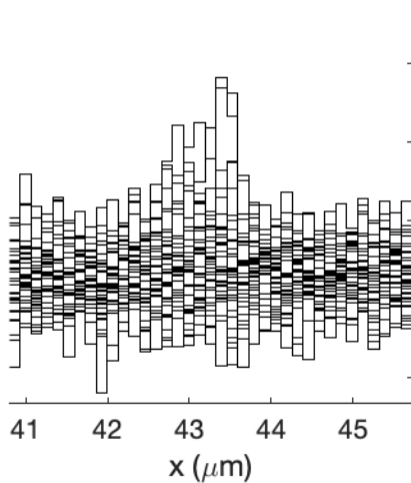**Vertical line scans**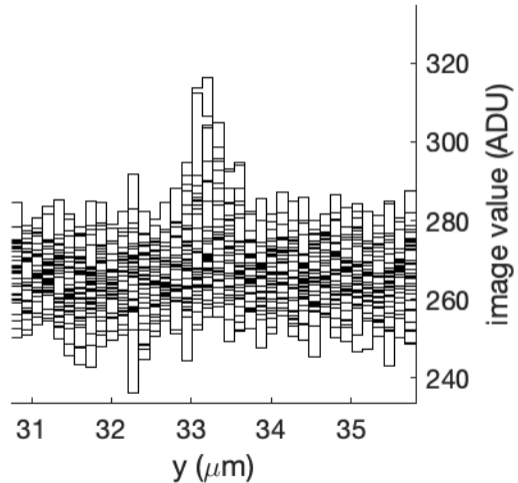

**Image frame 12**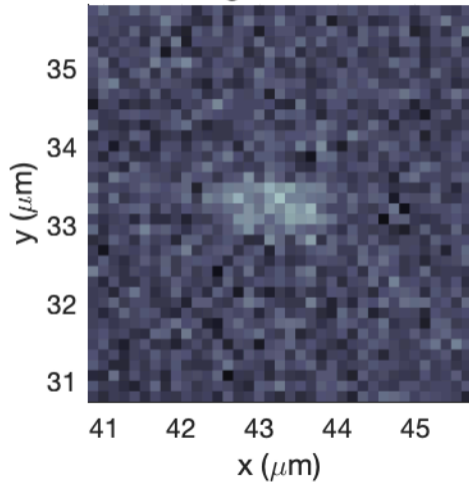**Horizontal line scans**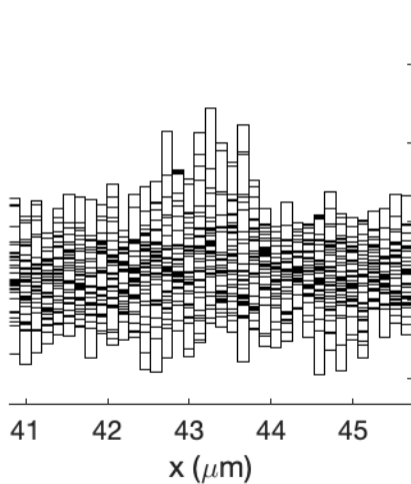**Vertical line scans**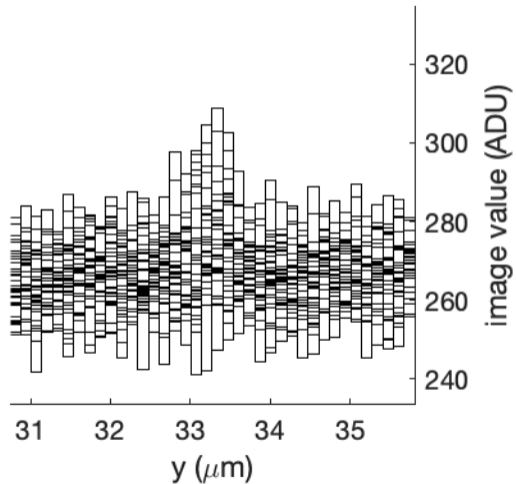

**Image frame 13**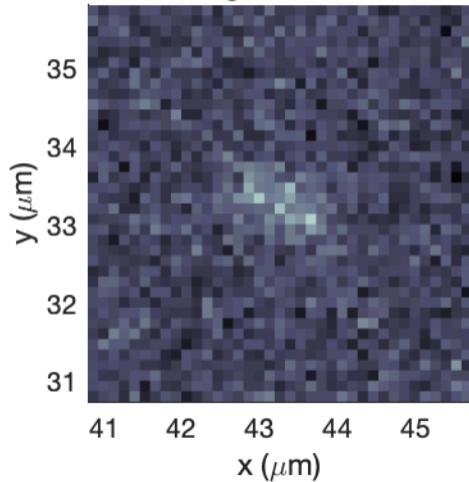**Horizontal line scans**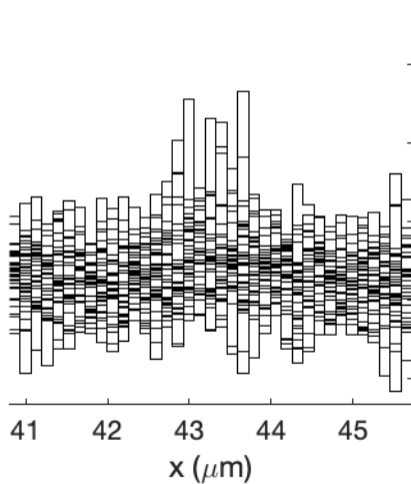**Vertical line scans**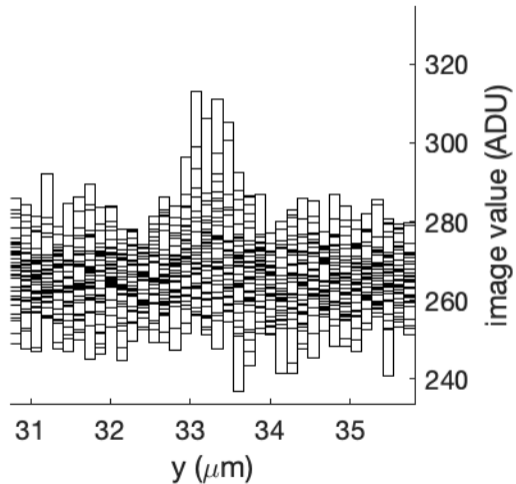

**Image frame 14**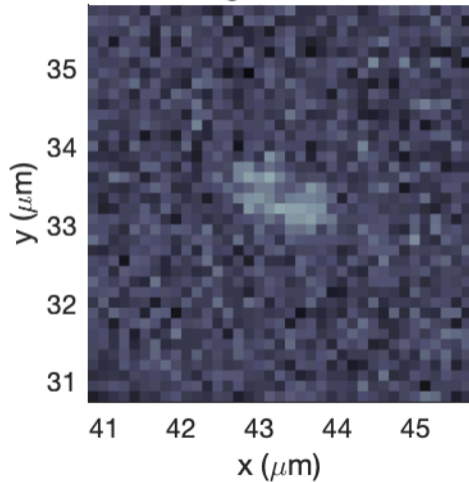**Horizontal line scans**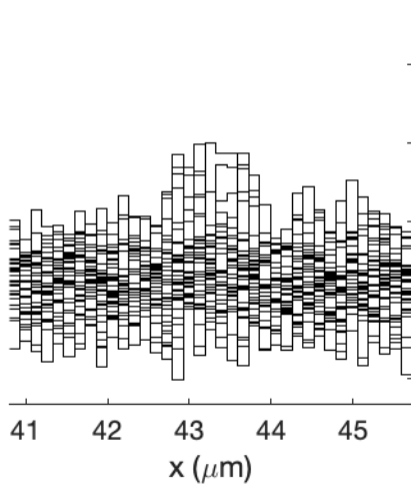**Vertical line scans**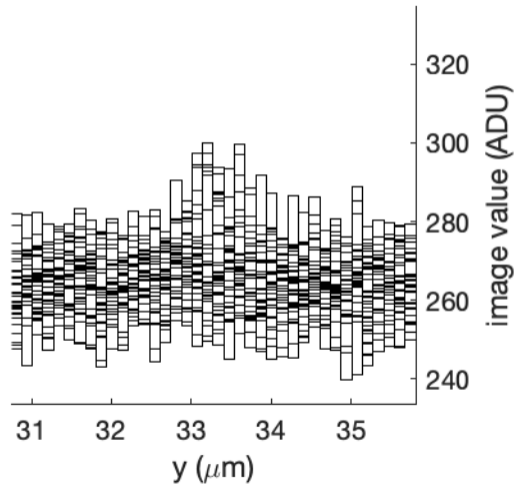

**Image frame 15**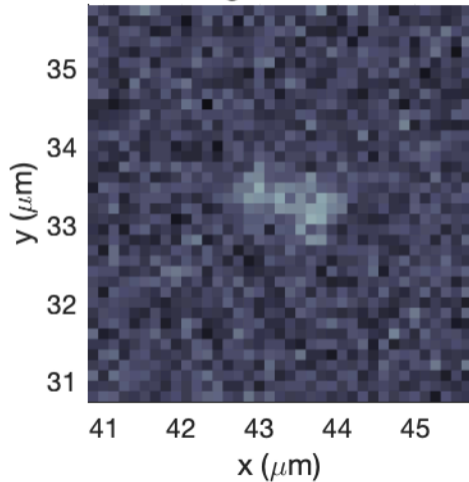**Horizontal line scans**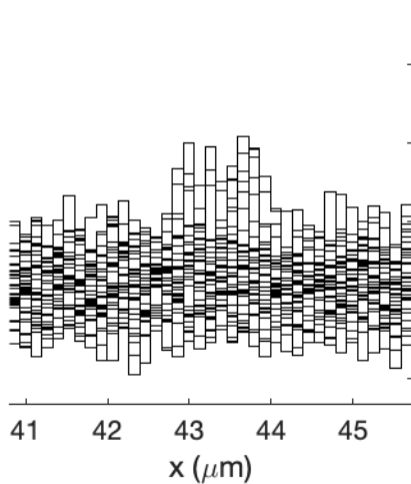**Vertical line scans**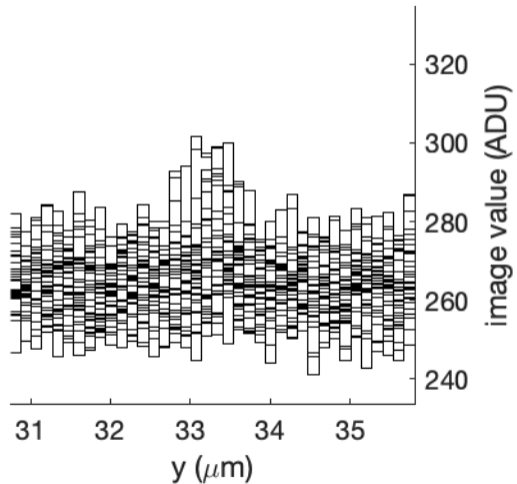

**Image frame 16**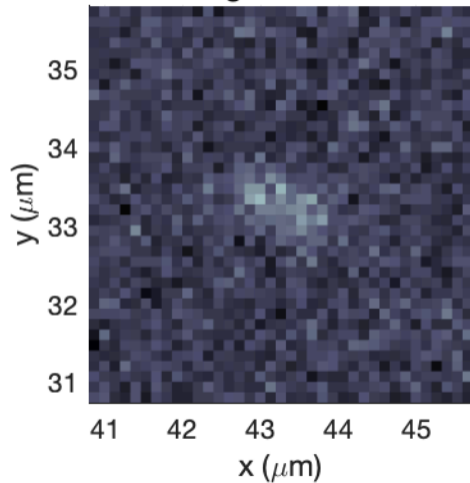**Horizontal line scans**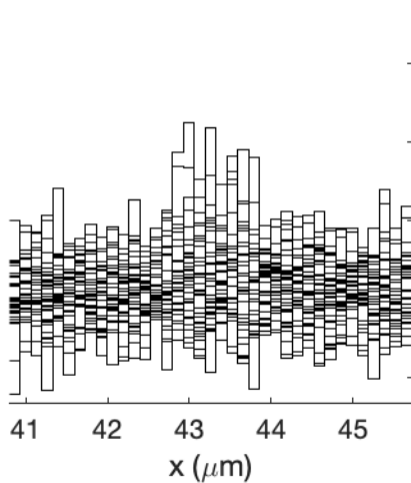**Vertical line scans**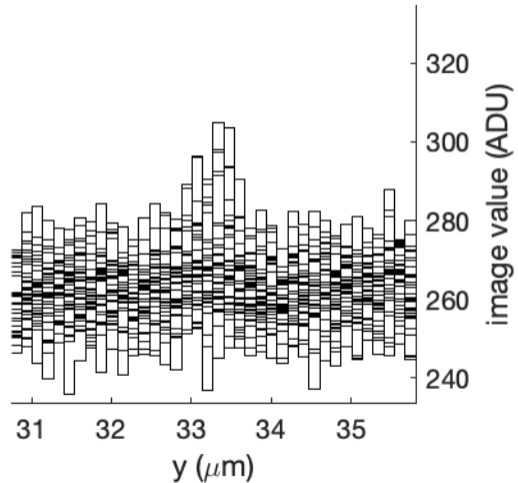



**Image frame 17**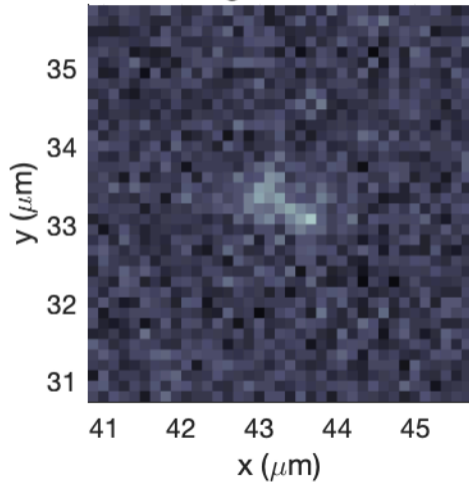**Horizontal line scans**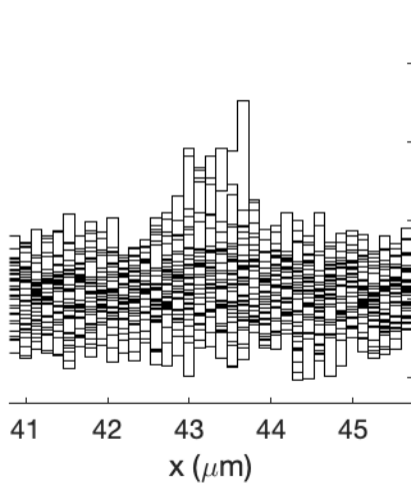**Vertical line scans**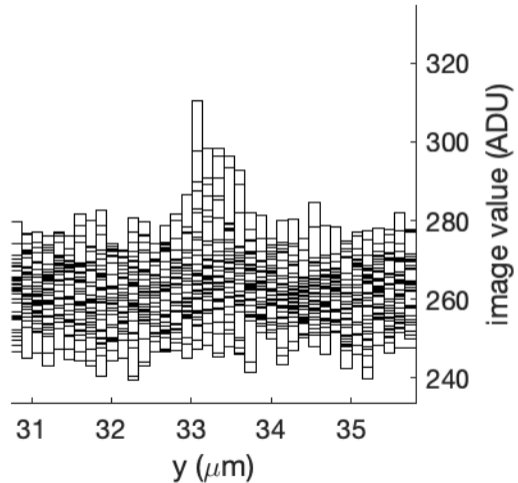

**Image frame 18**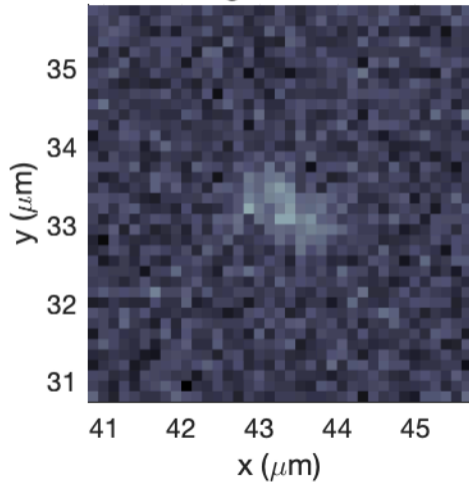**Horizontal line scans**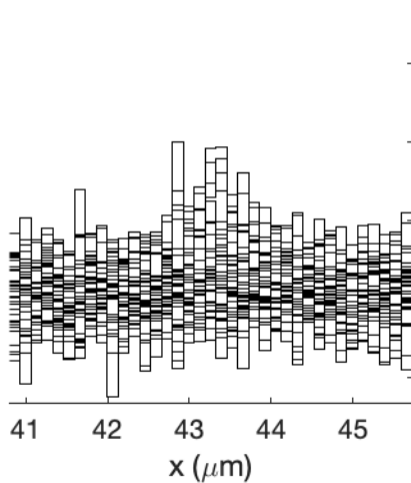**Vertical line scans**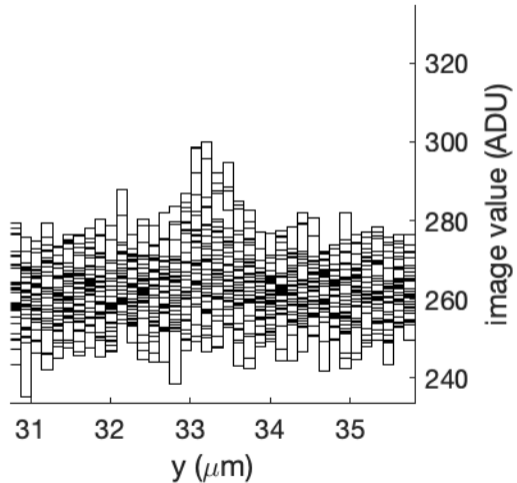

**Image frame 19**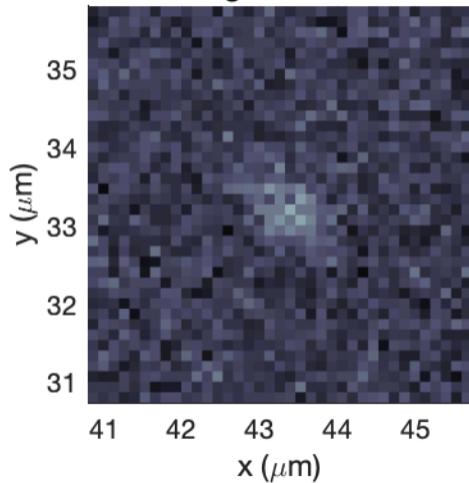**Horizontal line scans**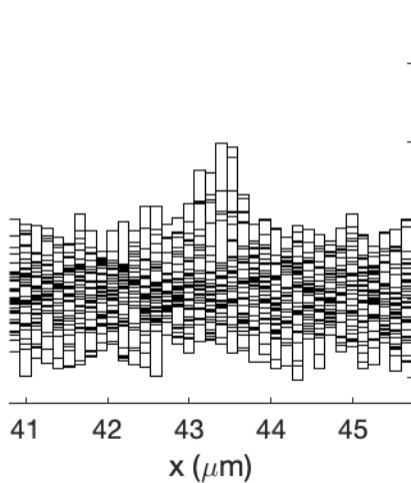**Vertical line scans**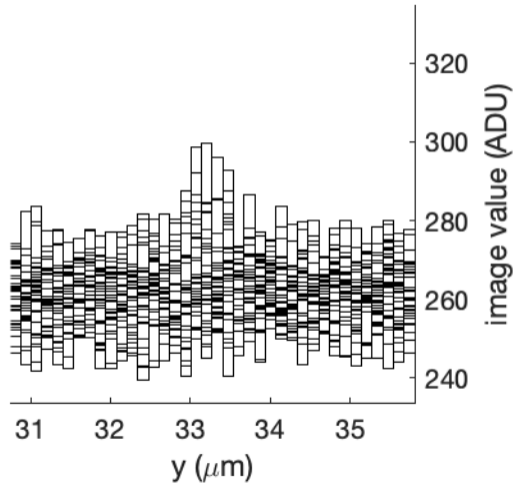

**Image frame 20**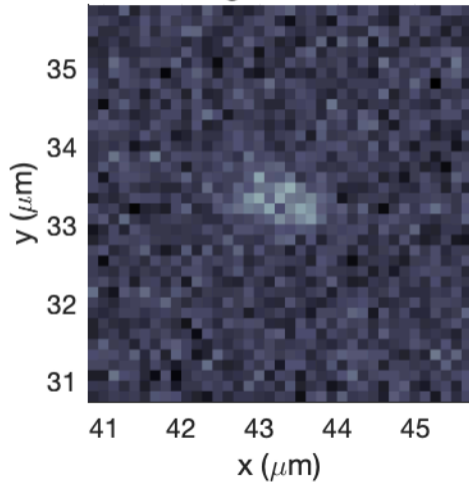**Horizontal line scans**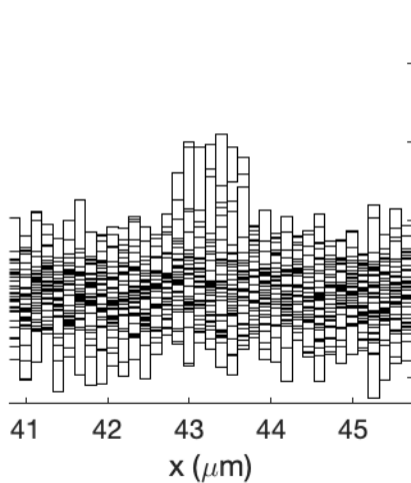**Vertical line scans**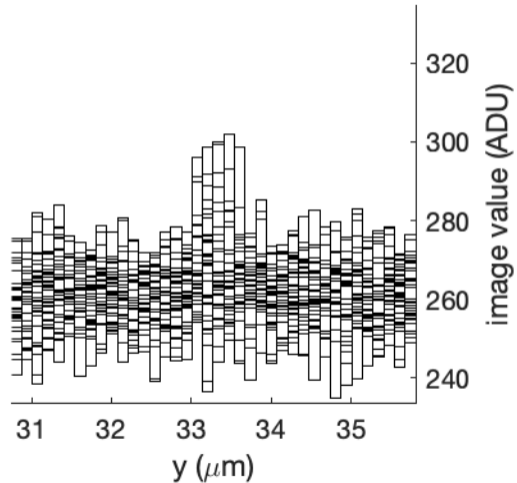

**Image frame 21**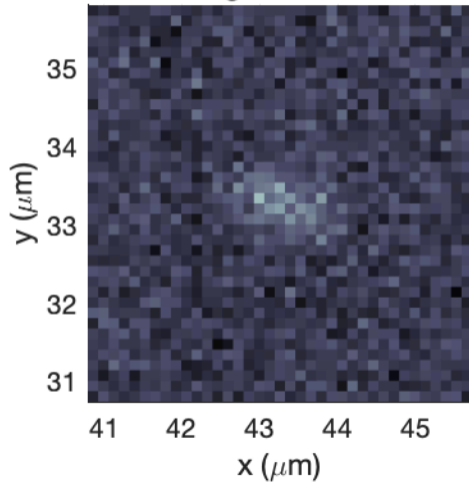**Horizontal line scans**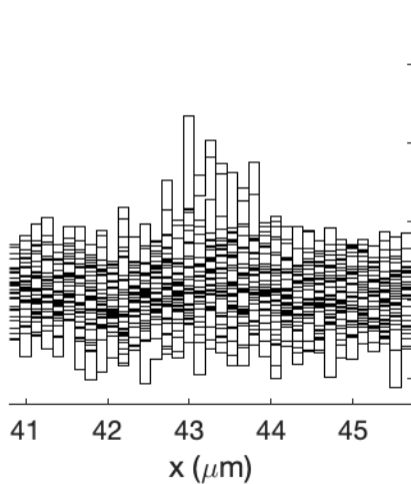**Vertical line scans**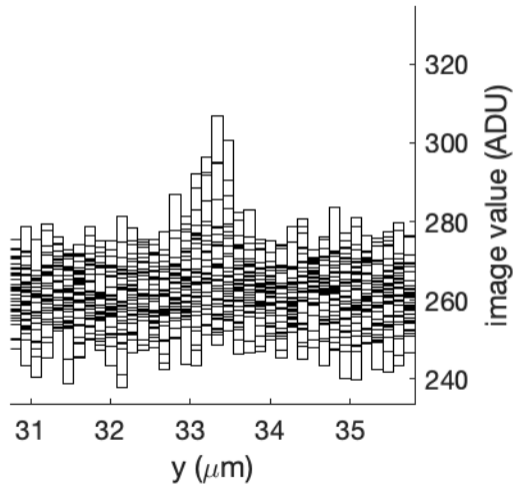

**Image frame 22**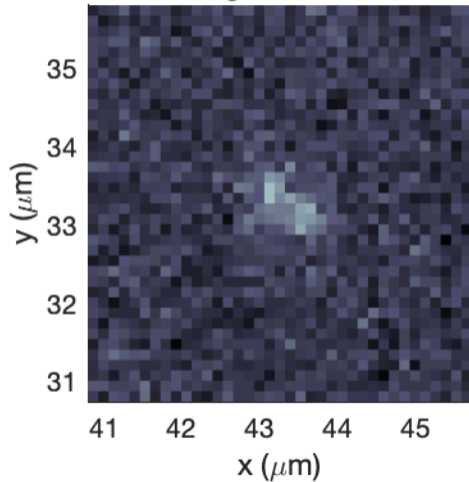**Horizontal line scans**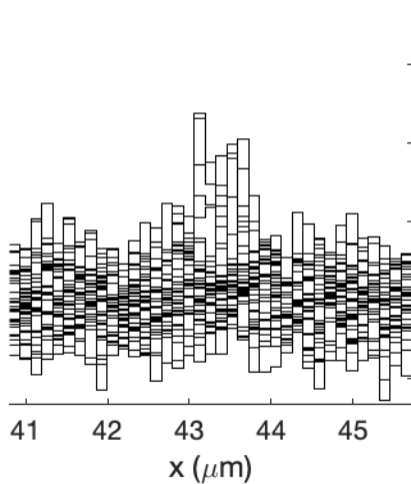**Vertical line scans**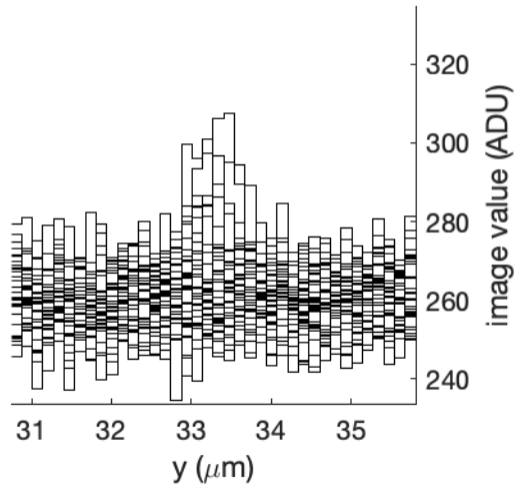

**Image frame 1**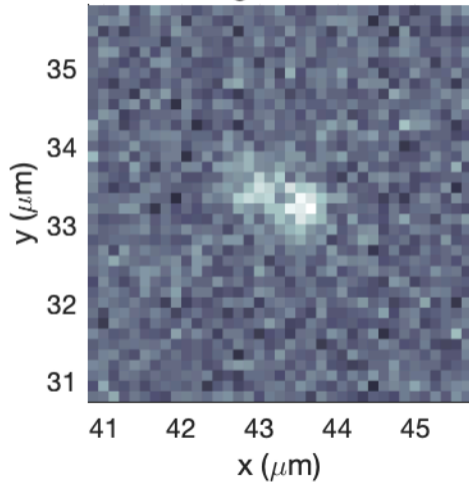**Horizontal line scans**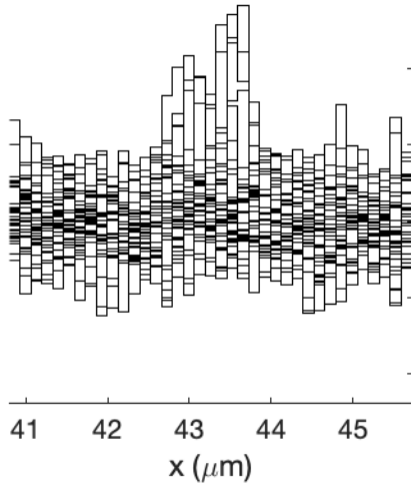**Vertical line scans**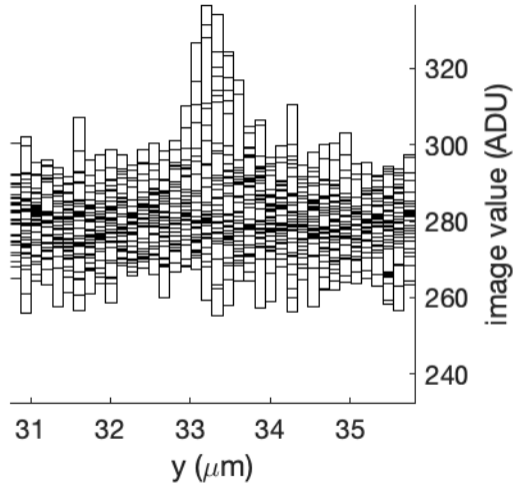

**Image frame 2**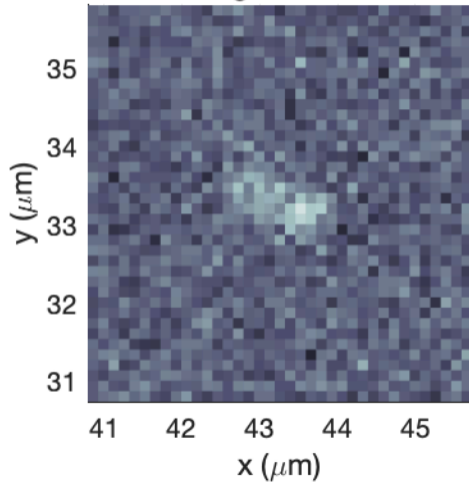**Horizontal line scans**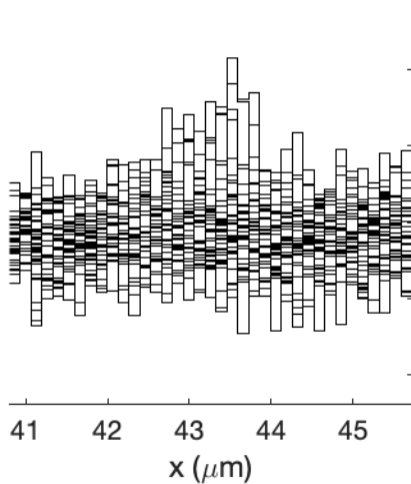**Vertical line scans**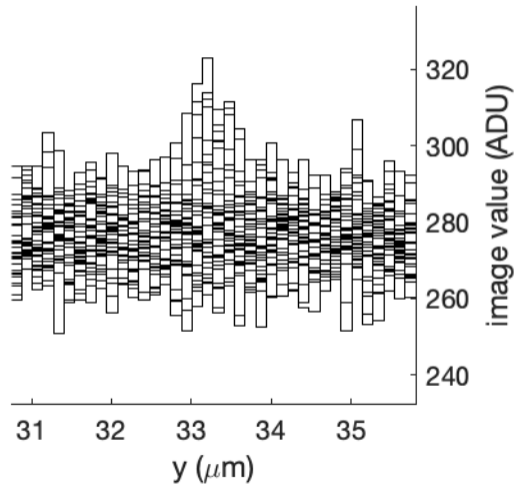



**Image frame 3**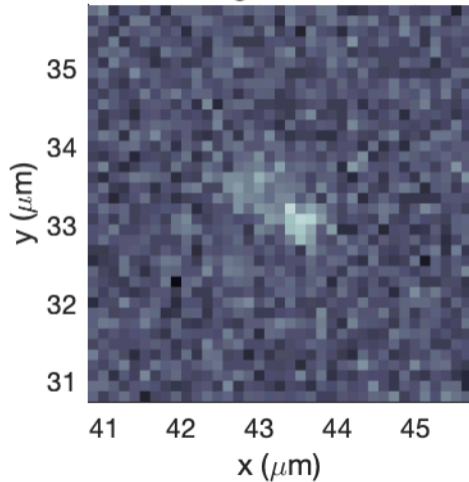**Horizontal line scans**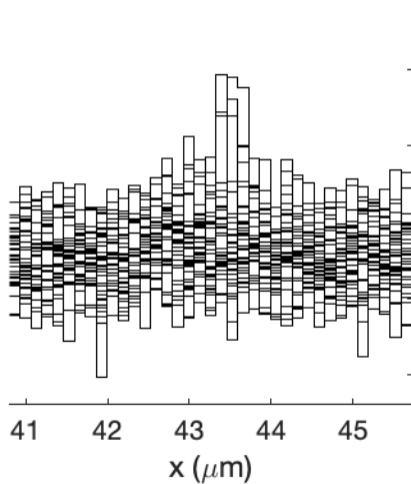**Vertical line scans**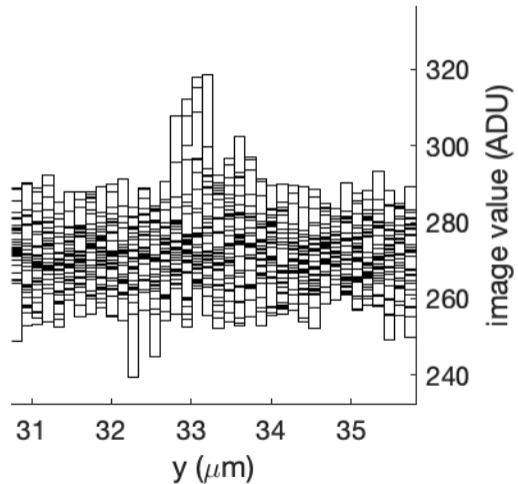

**Image frame 4**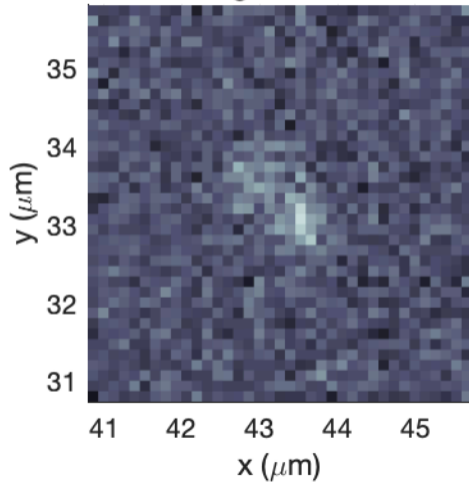**Horizontal line scans**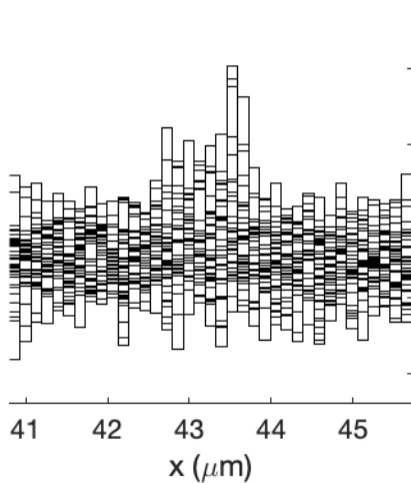**Vertical line scans**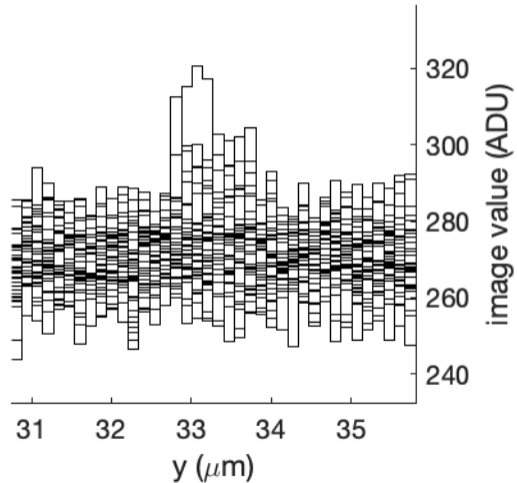

**Image frame 5**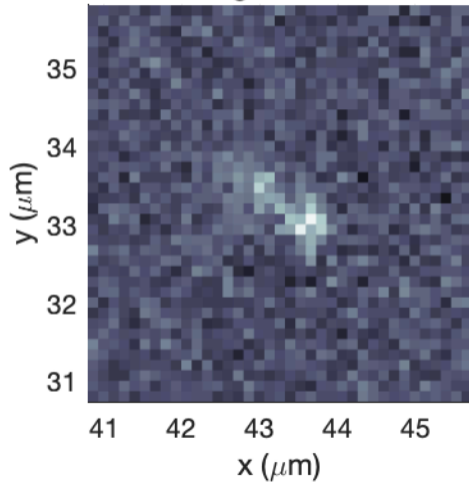**Horizontal line scans**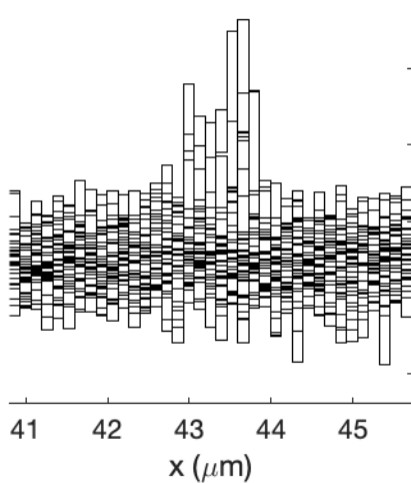**Vertical line scans**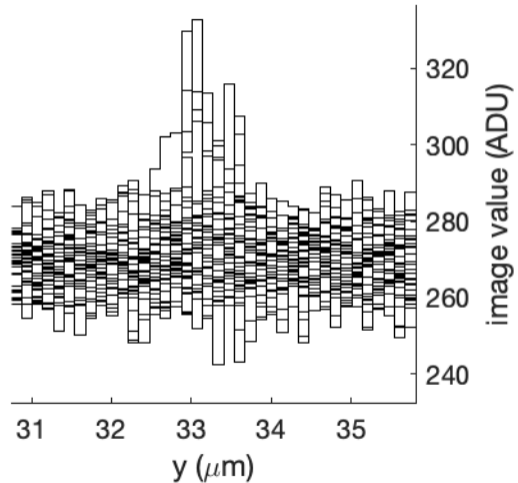

**Image frame 6**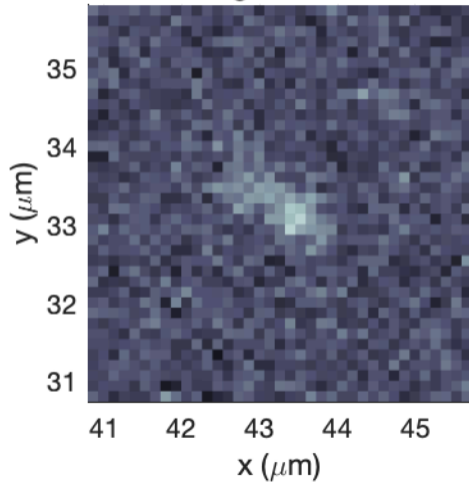**Horizontal line scans**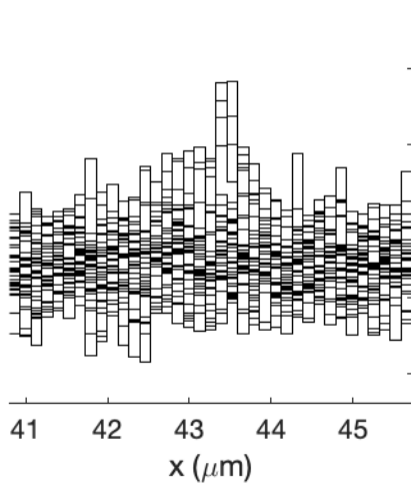**Vertical line scans**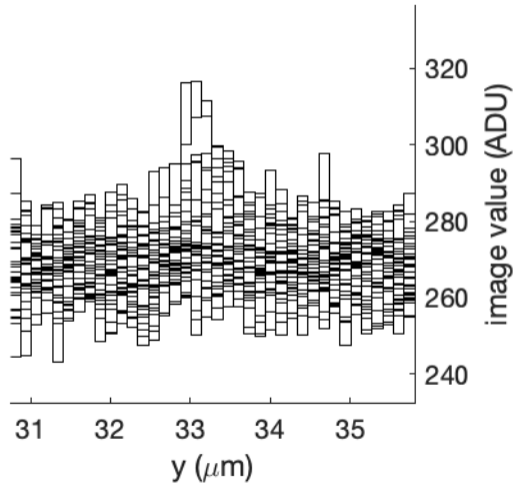

**Image frame 7**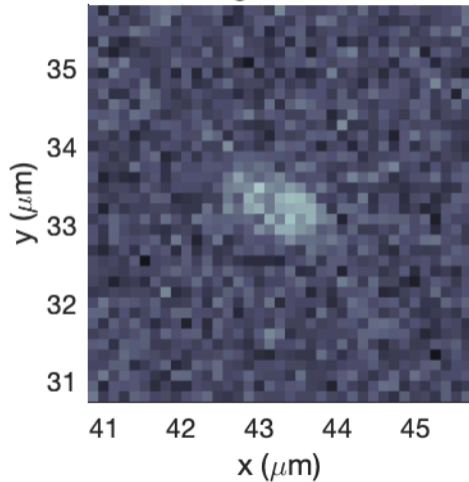**Horizontal line scans**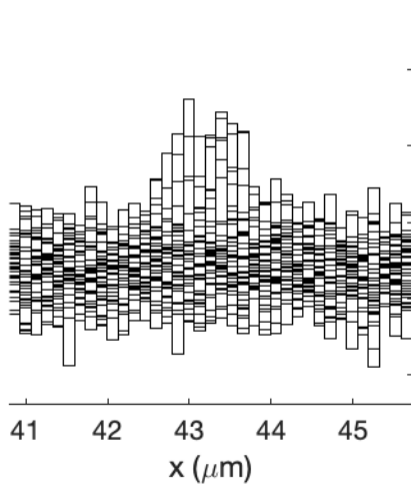**Vertical line scans**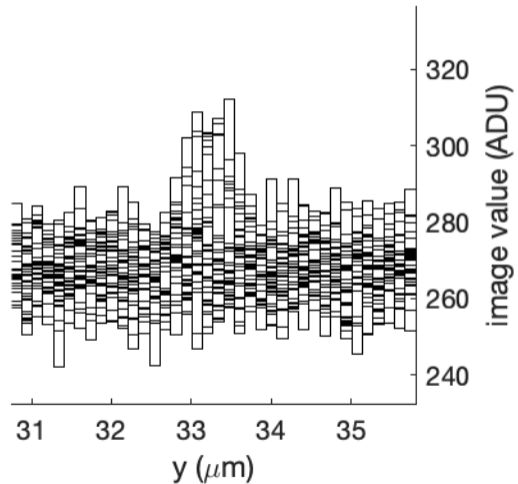

**Image frame 8**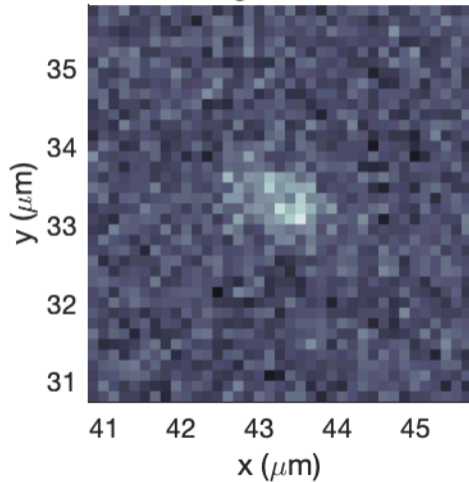**Horizontal line scans**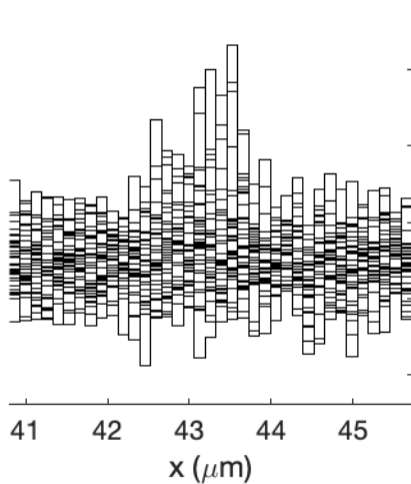**Vertical line scans**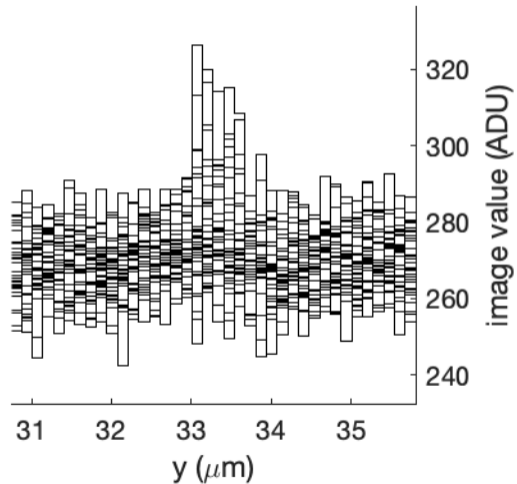

**Image frame 9**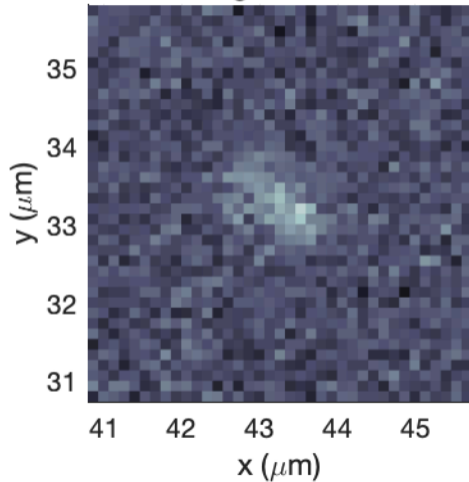**Horizontal line scans**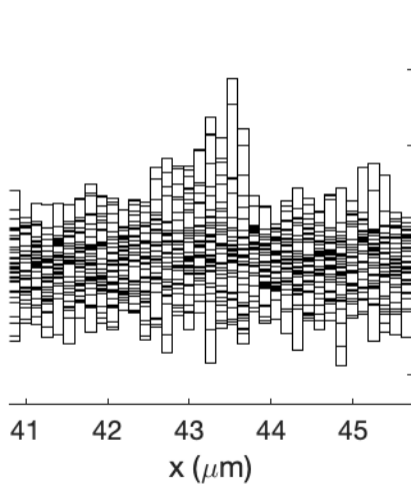**Vertical line scans**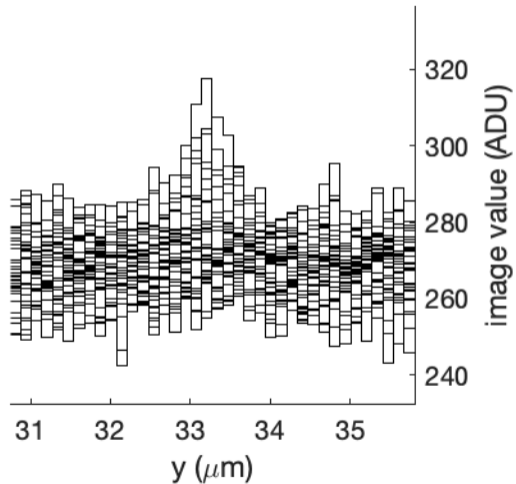

**Image frame 10**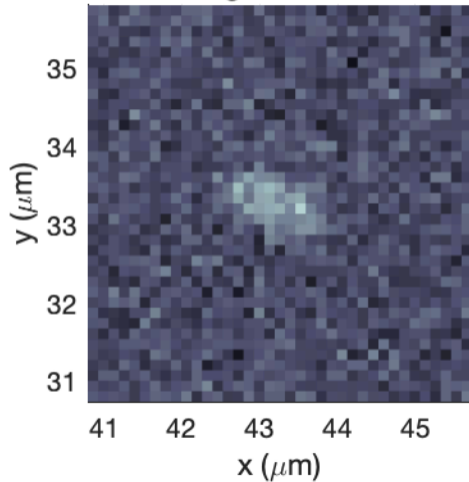**Horizontal line scans**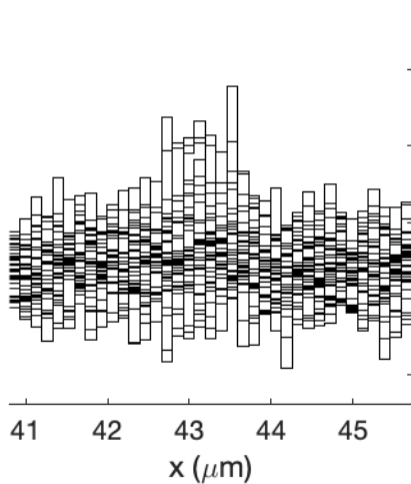**Vertical line scans**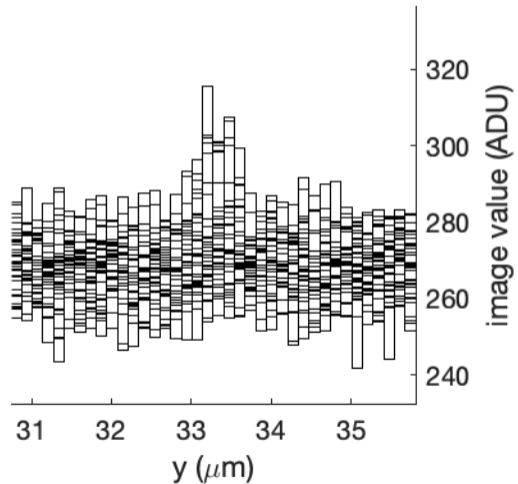



**Image frame 11**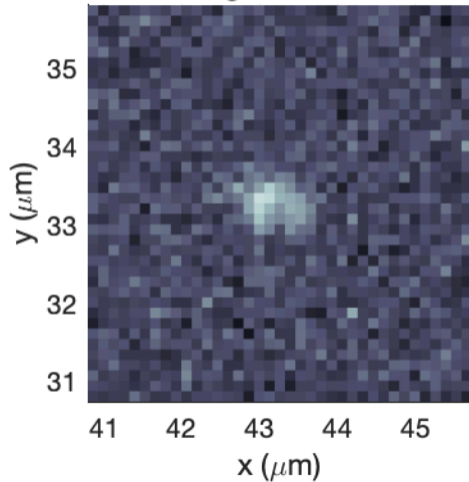**Horizontal line scans**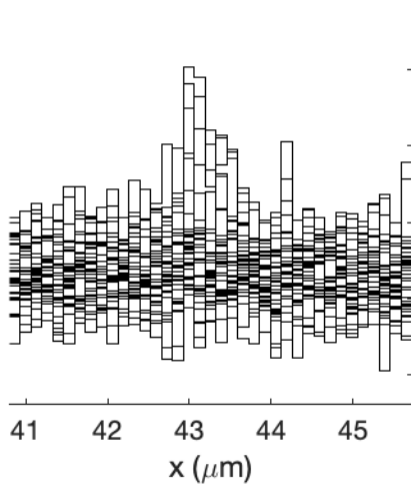**Vertical line scans**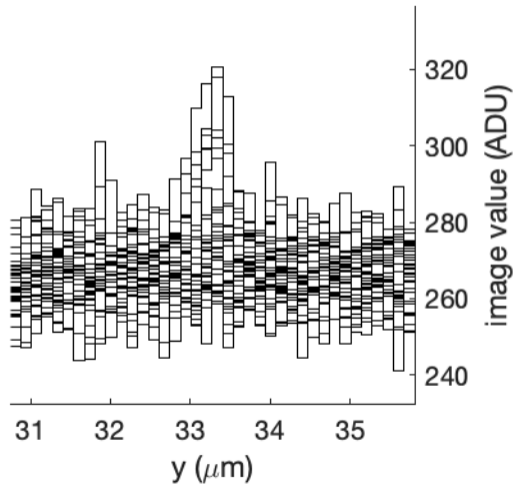

**Image frame 12**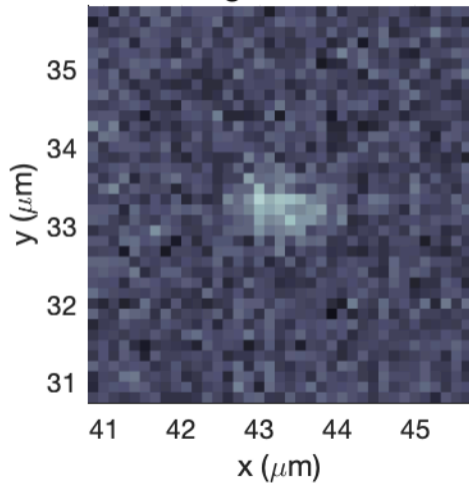**Horizontal line scans**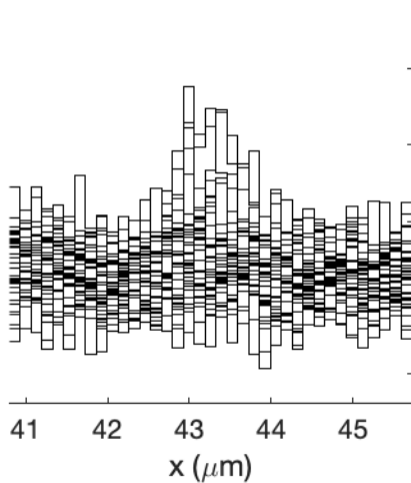**Vertical line scans**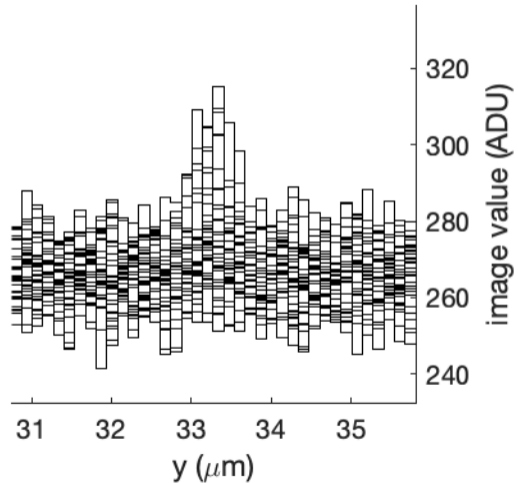

**Image frame 13**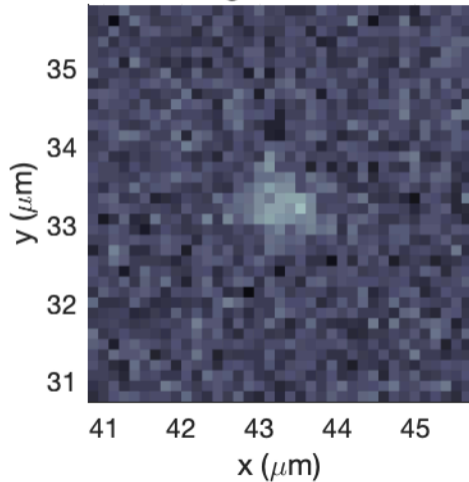**Horizontal line scans**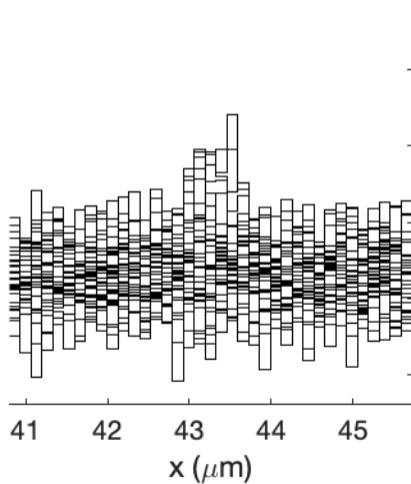**Vertical line scans**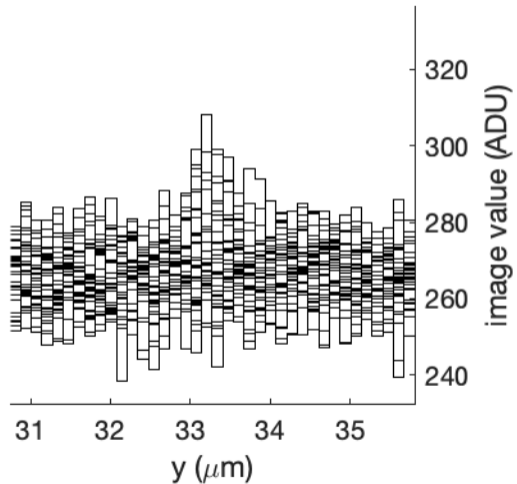

**Image frame 14**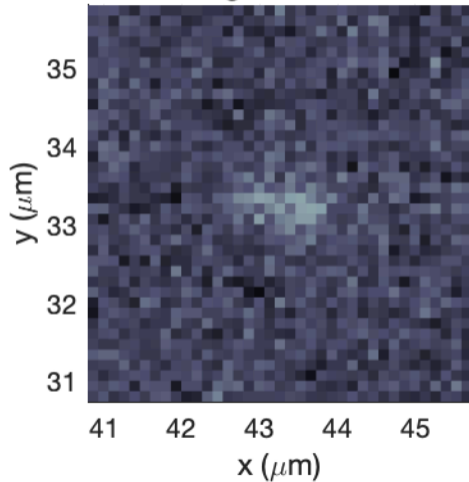**Horizontal line scans**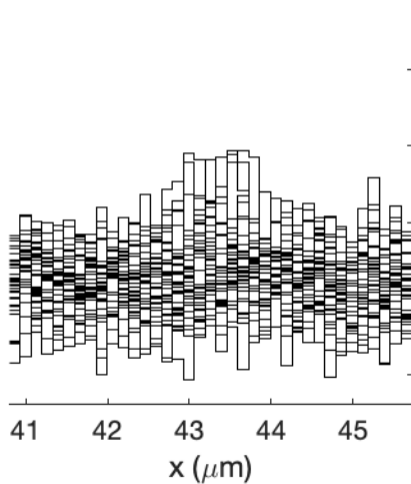**Vertical line scans**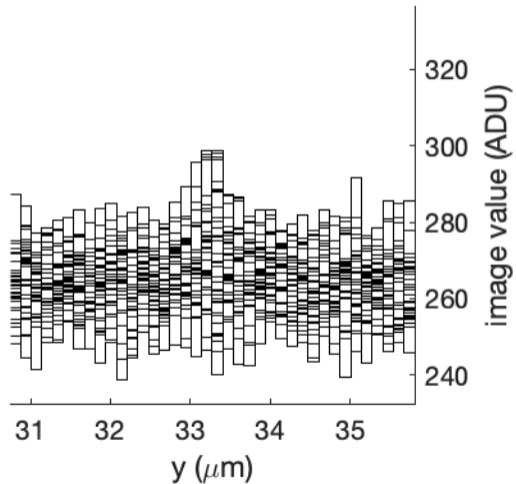

**Image frame 15**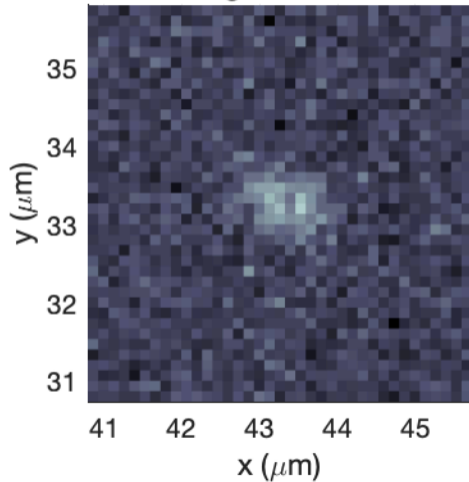**Horizontal line scans**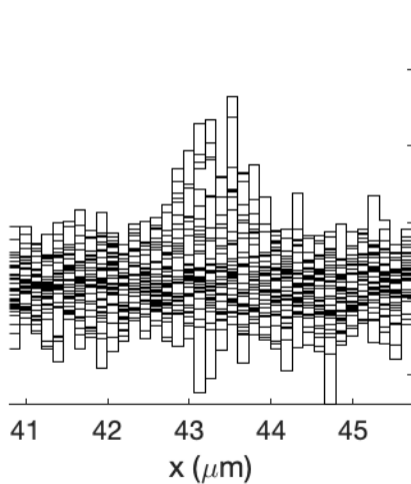**Vertical line scans**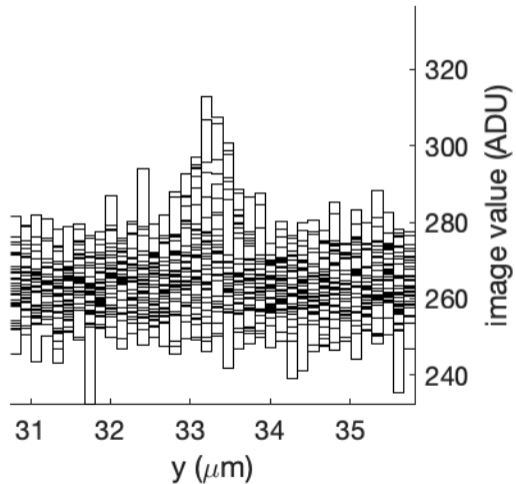

**Image frame 16**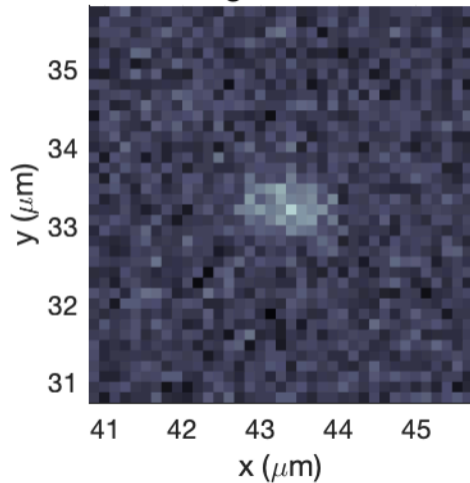**Horizontal line scans**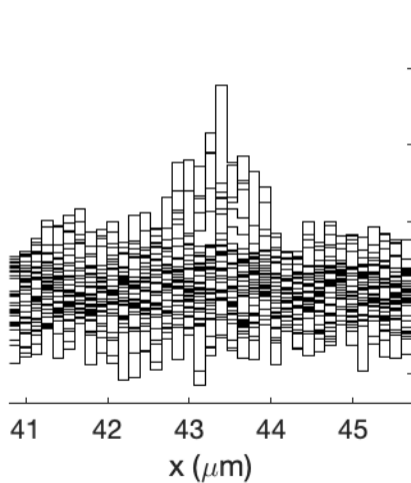**Vertical line scans**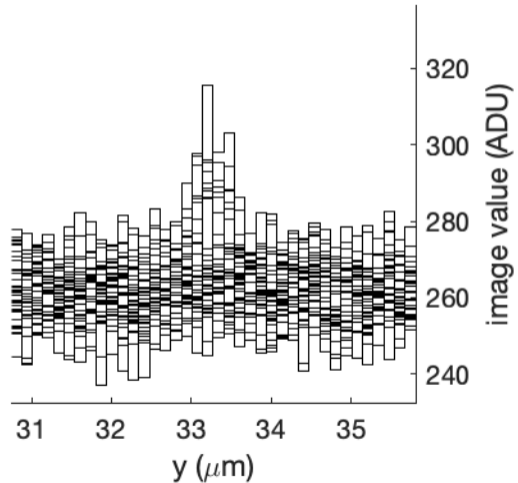

**Image frame 17**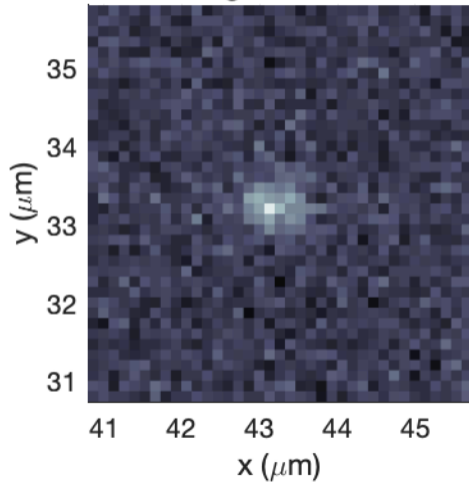**Horizontal line scans**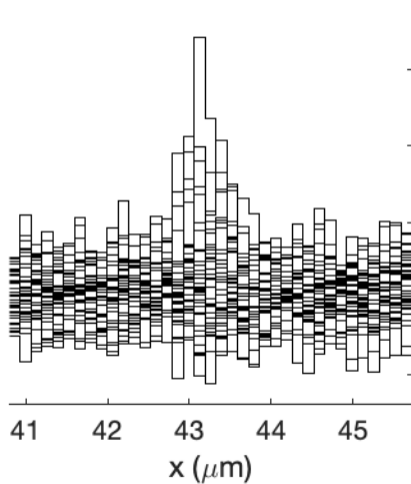**Vertical line scans**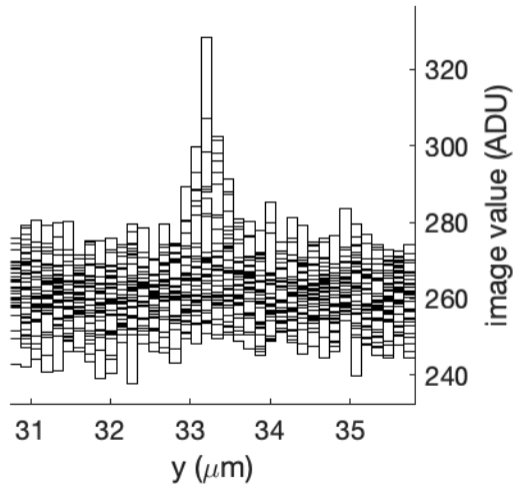

**Image frame 18**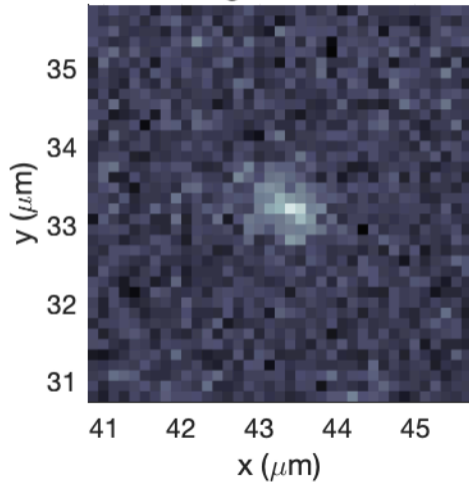**Horizontal line scans**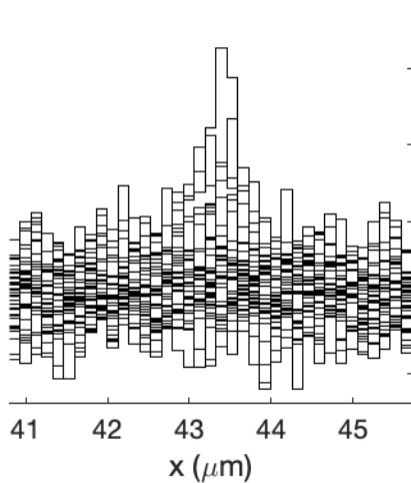**Vertical line scans**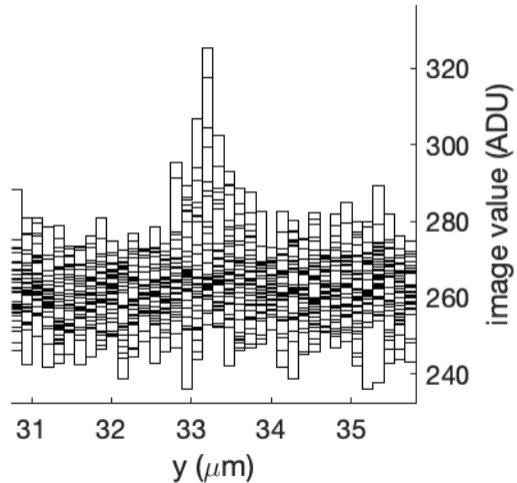



**Image frame 19**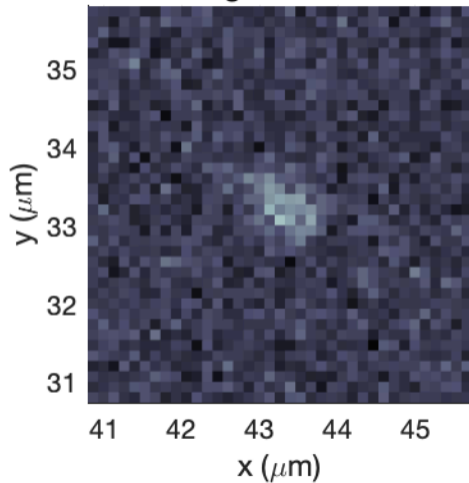**Horizontal line scans**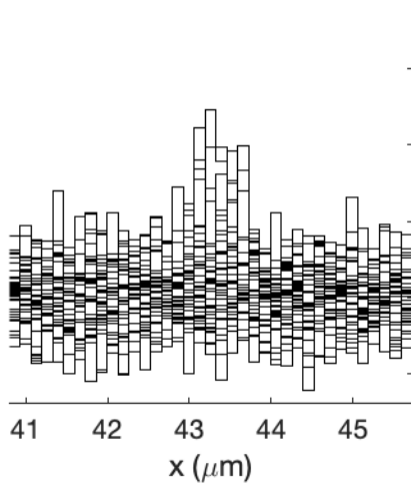**Vertical line scans**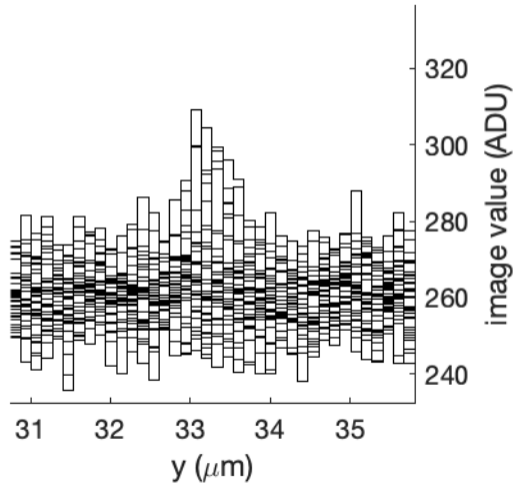

**Image frame 20**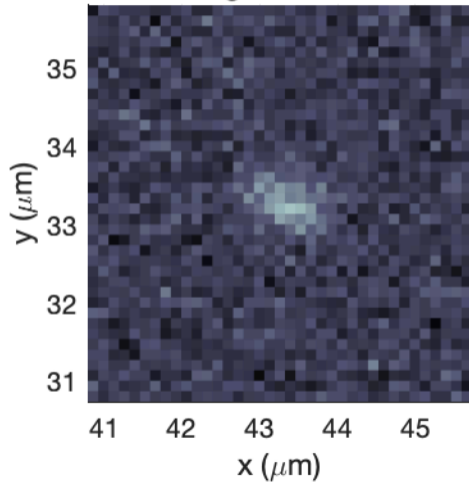**Horizontal line scans**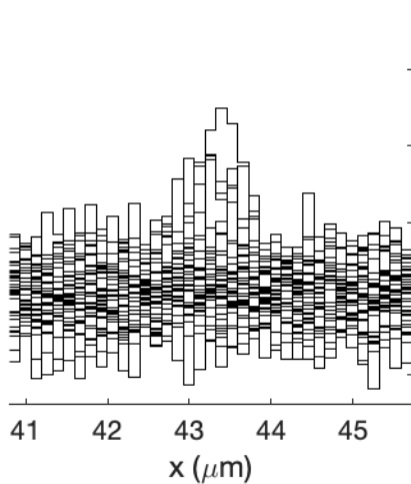**Vertical line scans**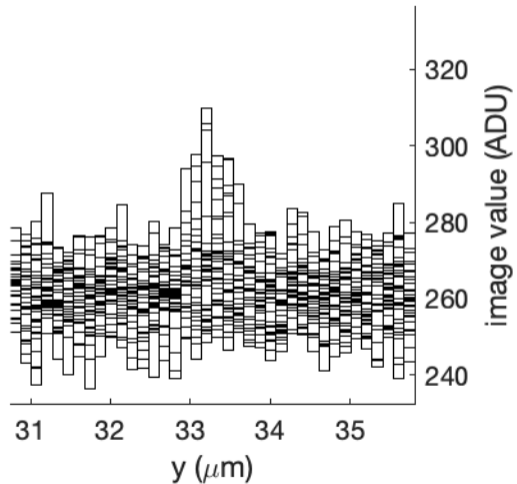

**Image frame 21**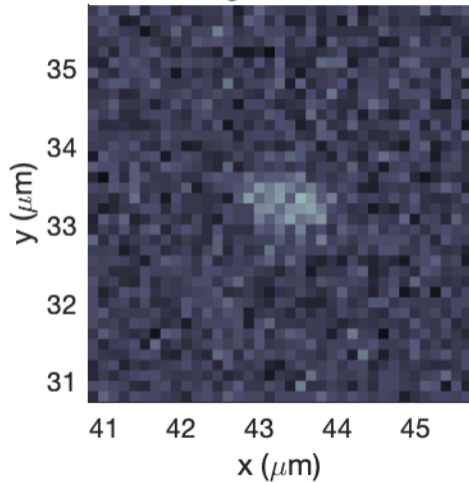**Horizontal line scans**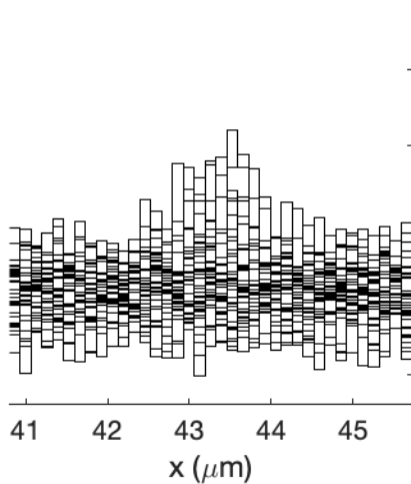**Vertical line scans**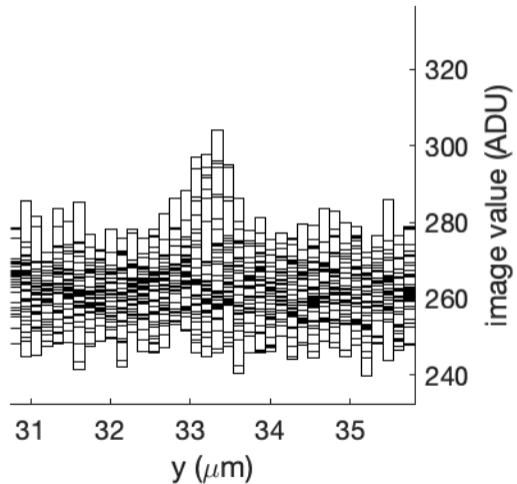

**Image frame 22**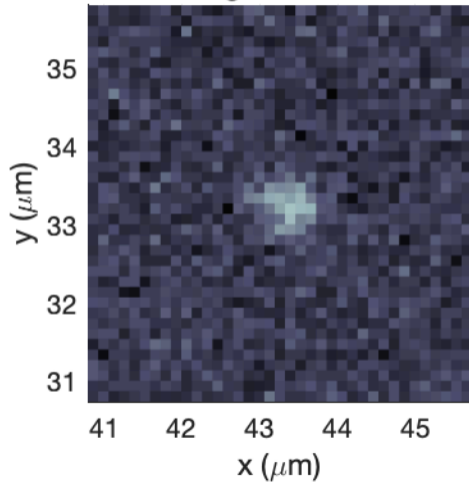**Horizontal line scans**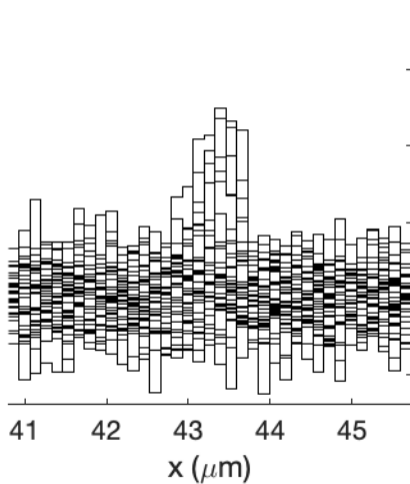**Vertical line scans**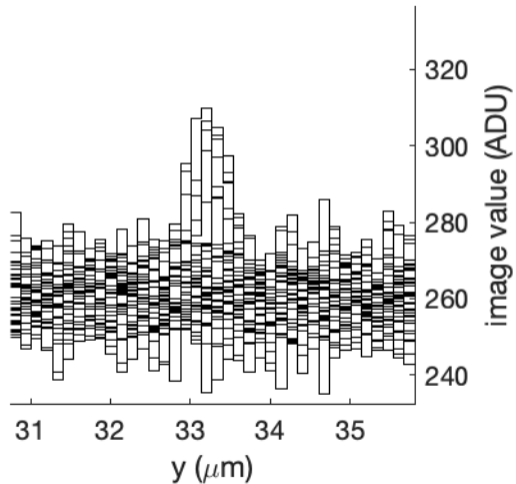

**Image frame 1**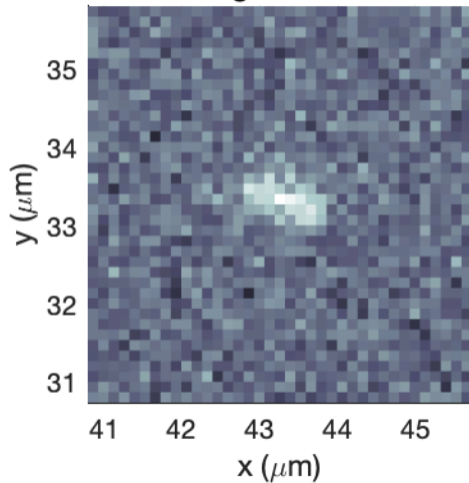**Horizontal line scans**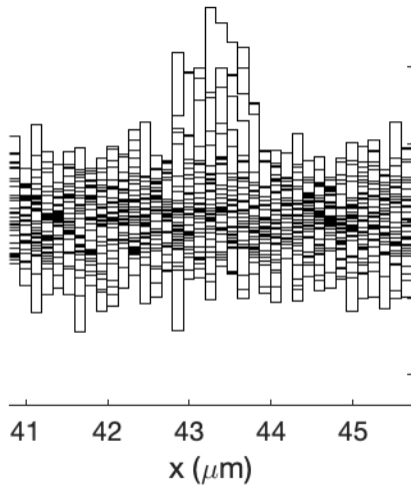**Vertical line scans**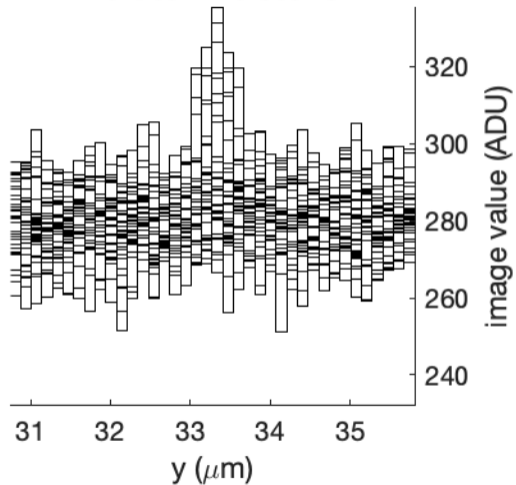

**Image frame 2**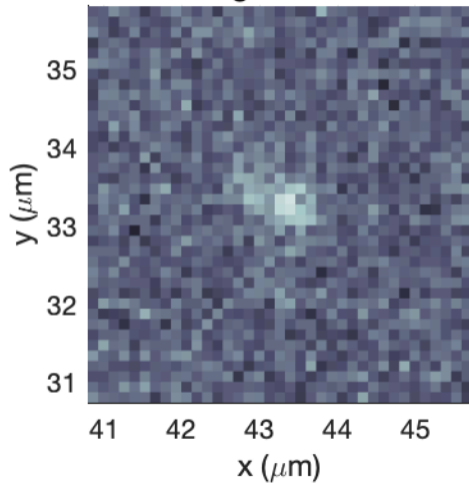**Horizontal line scans**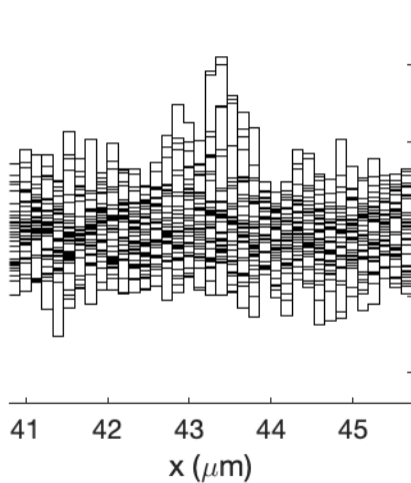**Vertical line scans**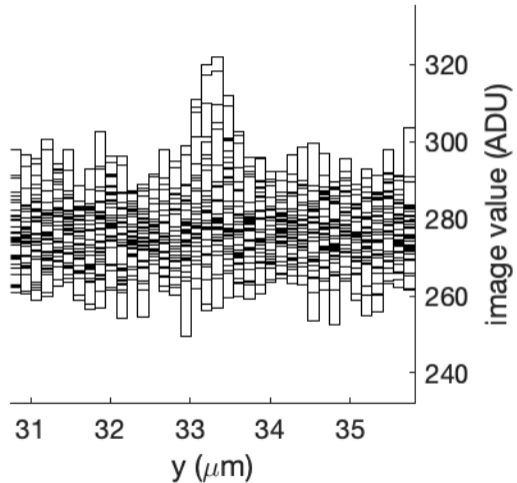

**Image frame 3**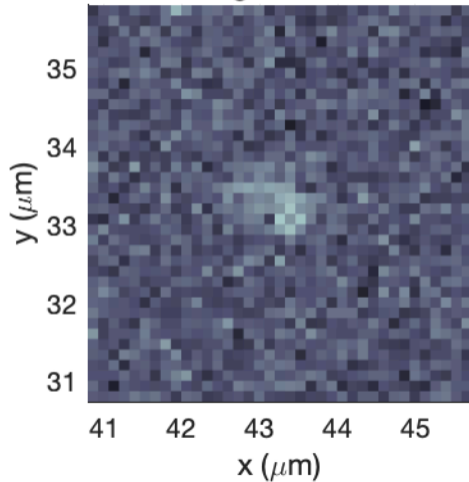**Horizontal line scans**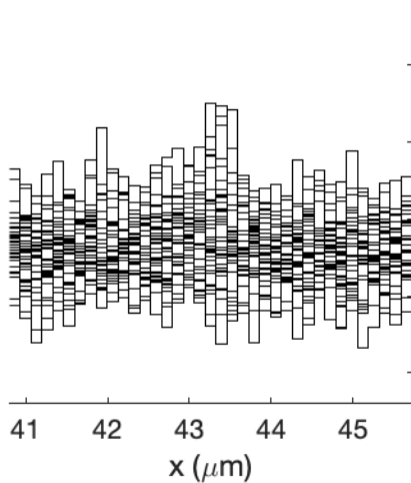**Vertical line scans**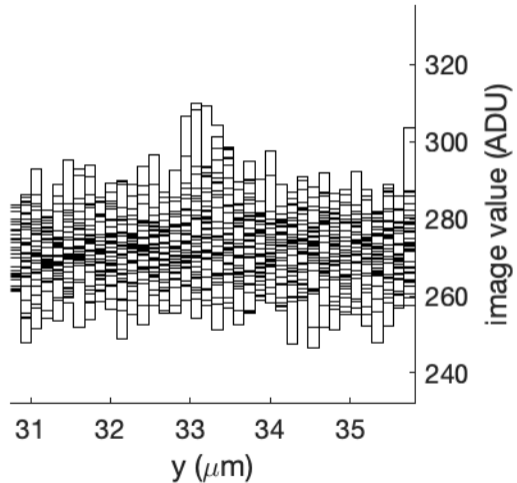

**Image frame 4**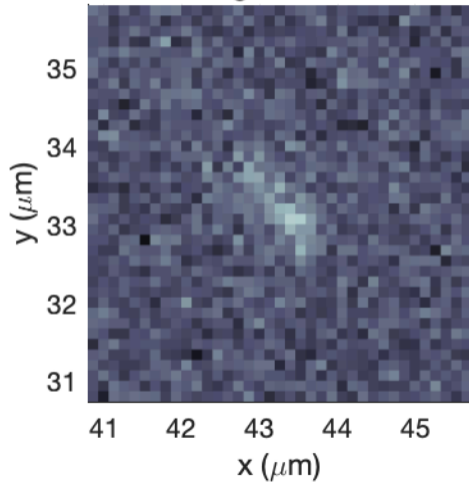**Horizontal line scans**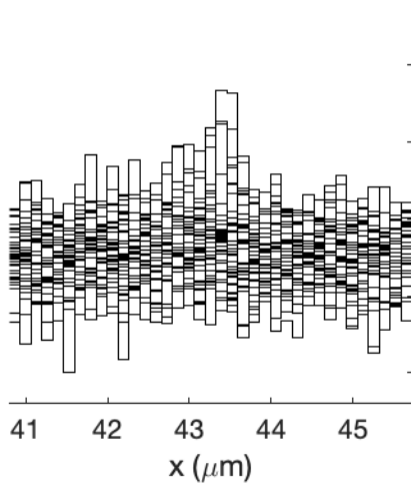**Vertical line scans**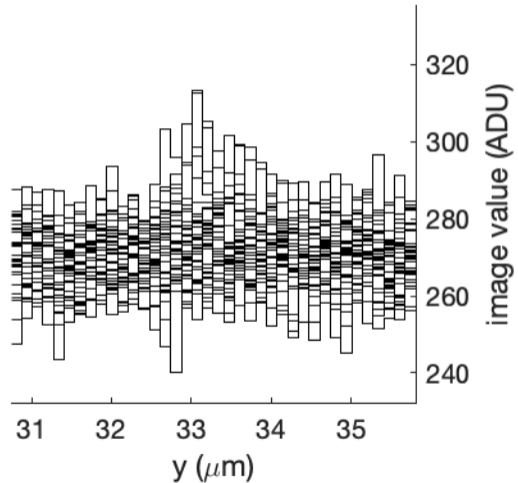



**Image frame 5**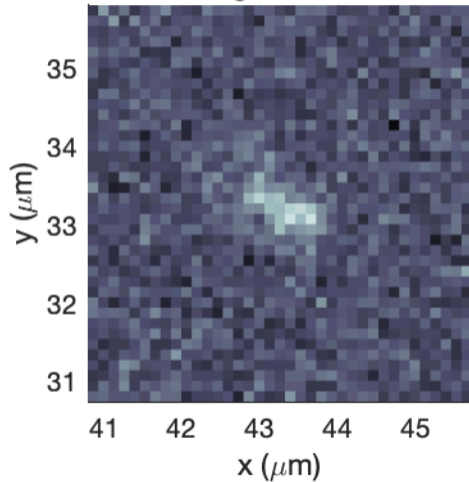**Horizontal line scans**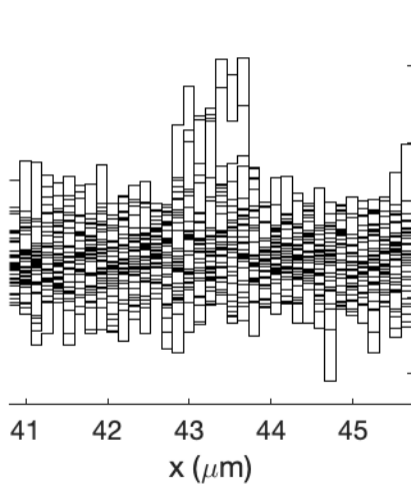**Vertical line scans**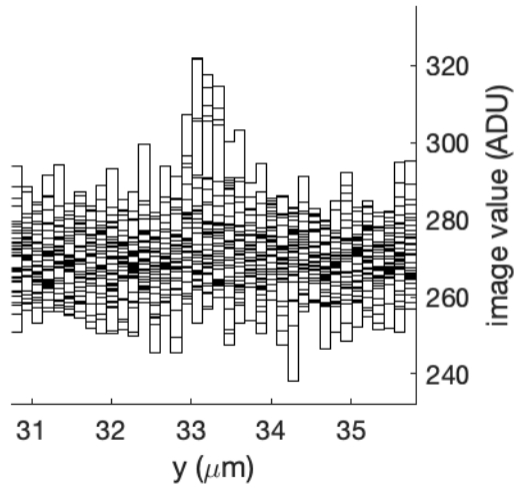

**Image frame 6**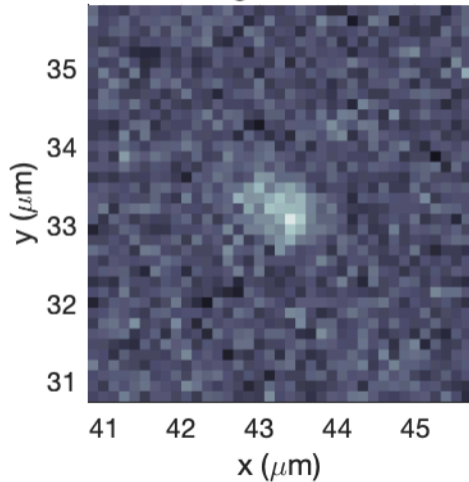**Horizontal line scans**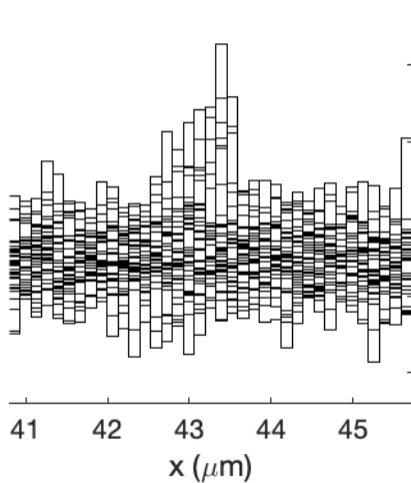**Vertical line scans**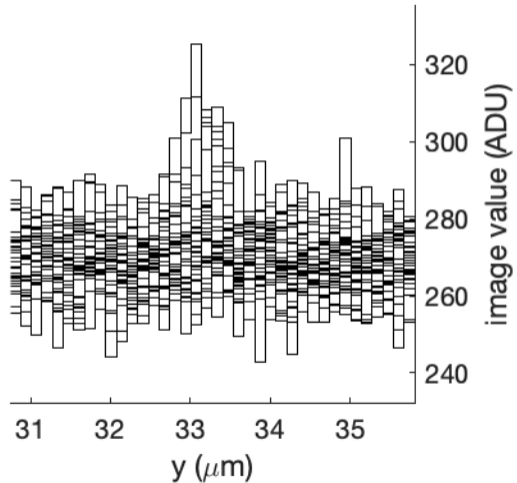

**Image frame 7**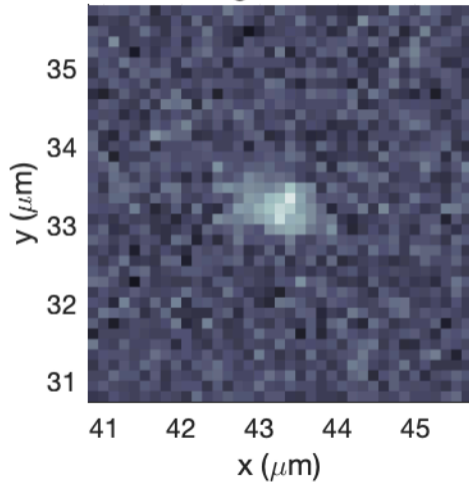**Horizontal line scans**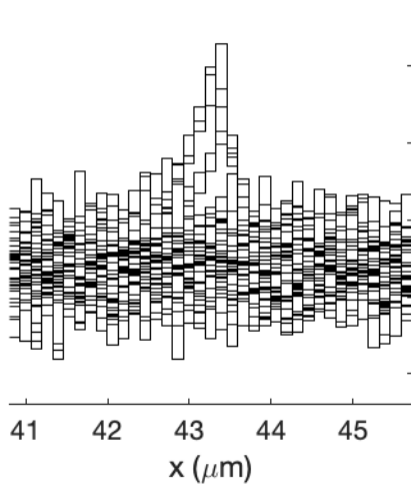**Vertical line scans**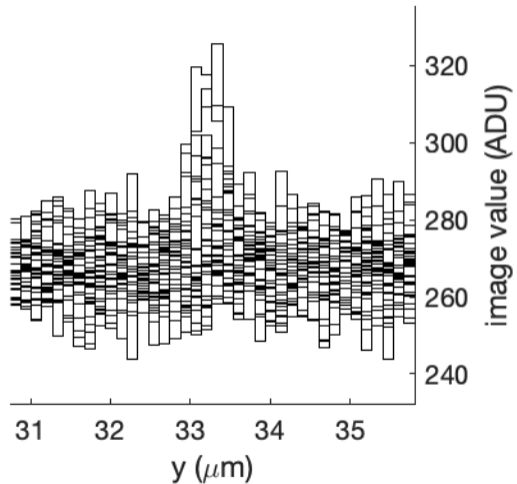

**Image frame 8**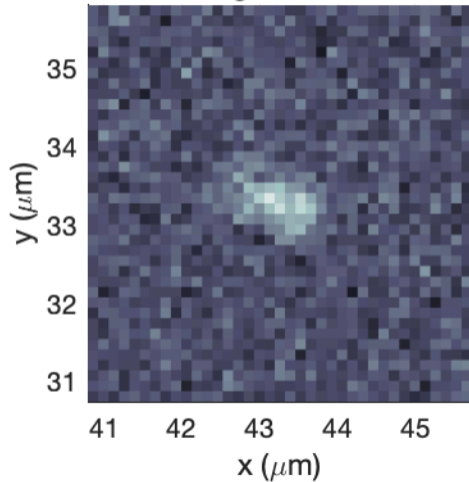**Horizontal line scans**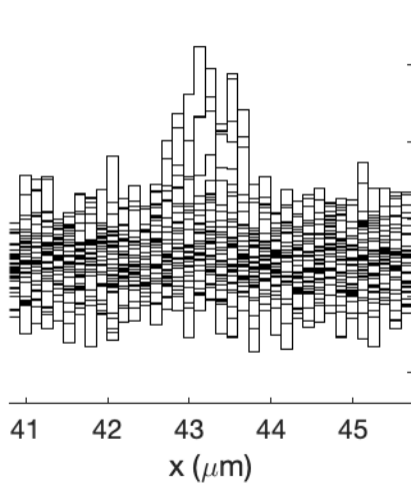**Vertical line scans**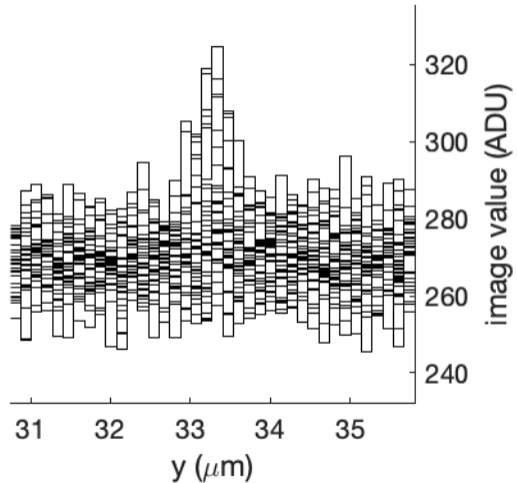

**Image frame 9**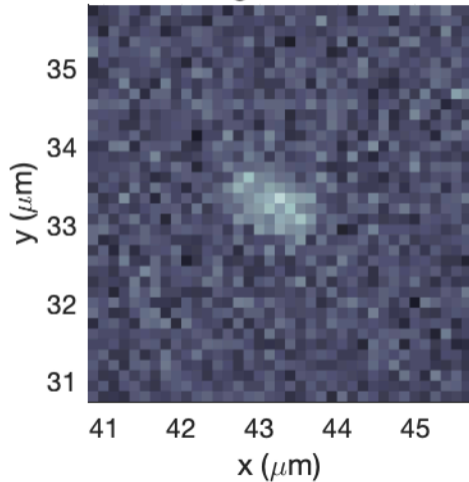**Horizontal line scans**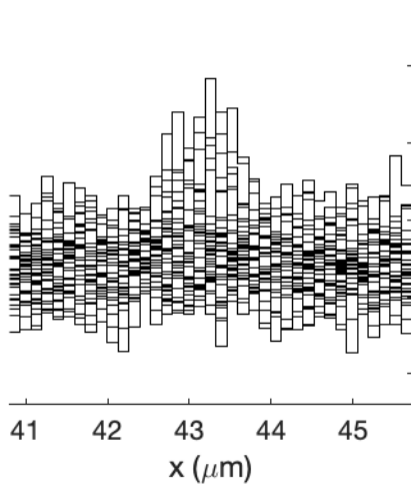**Vertical line scans**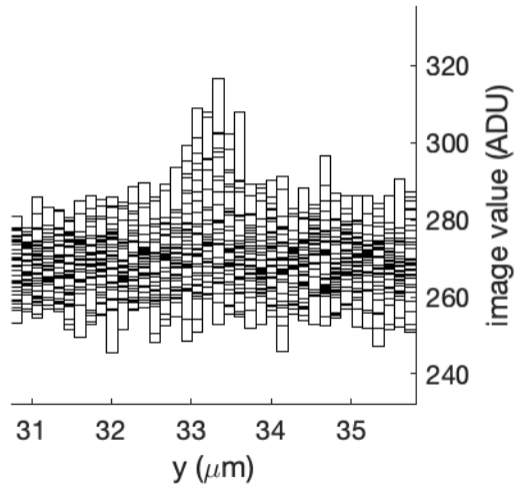

**Image frame 10**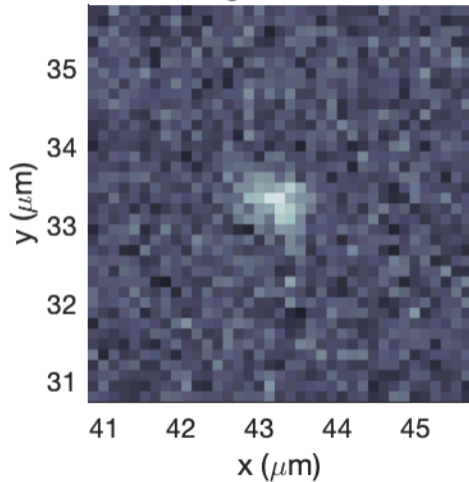**Horizontal line scans**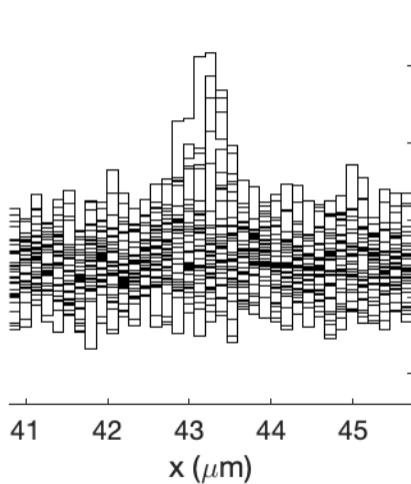**Vertical line scans**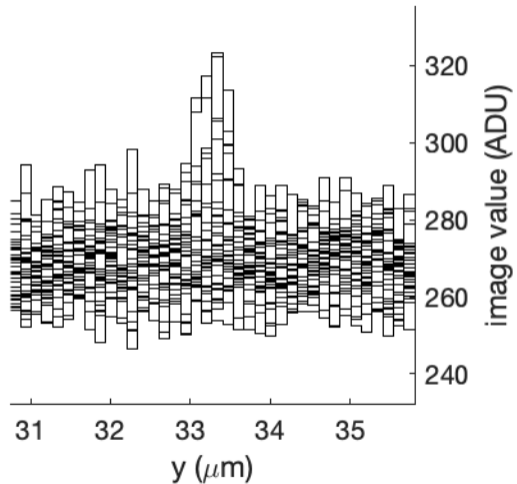

**Image frame 11**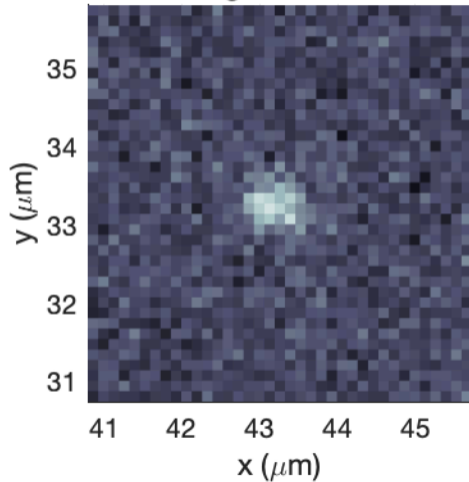**Horizontal line scans**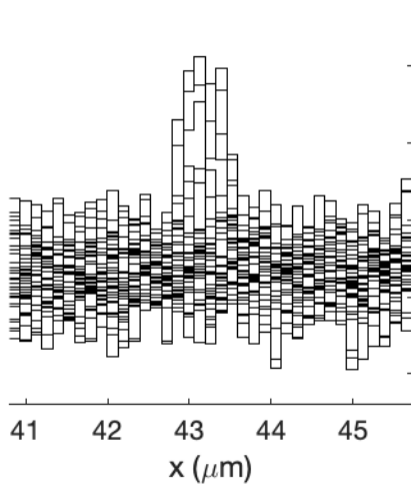**Vertical line scans**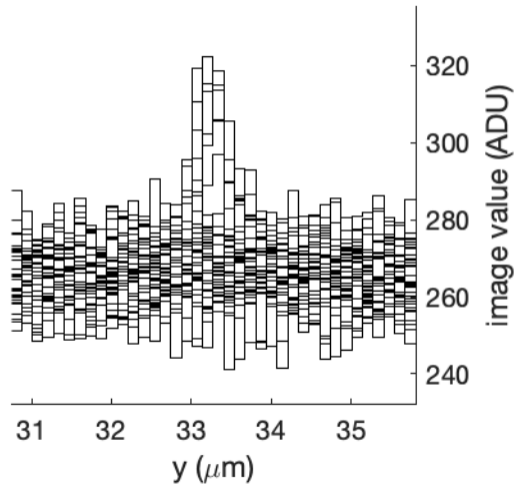

**Image frame 12**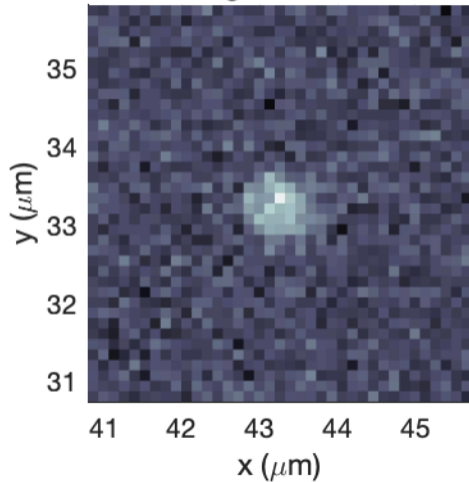**Horizontal line scans**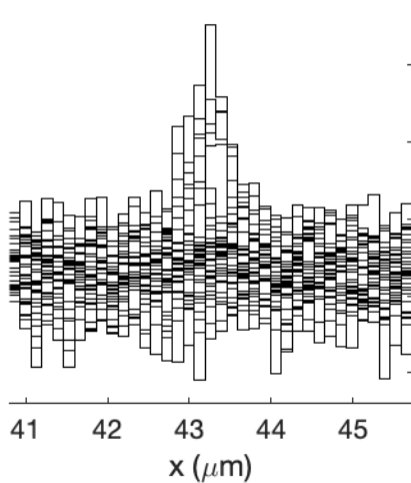**Vertical line scans**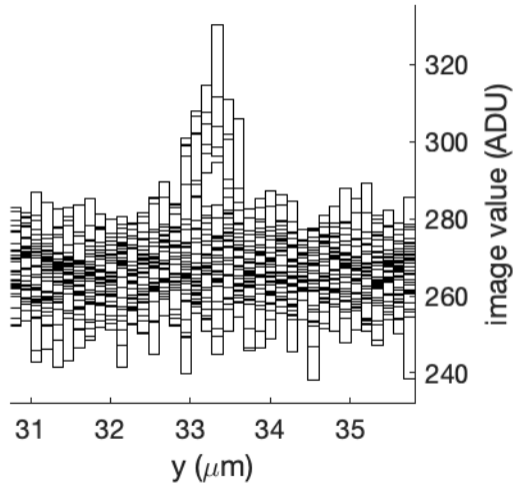



**Image frame 13**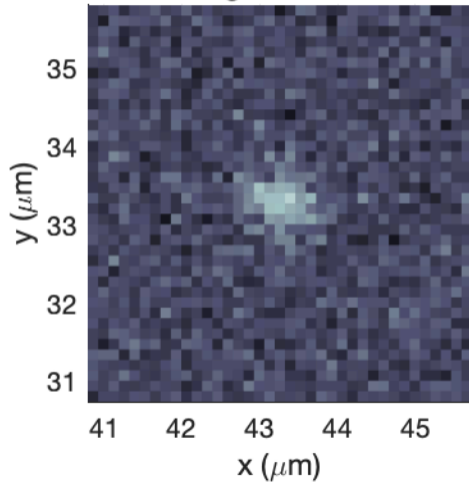**Horizontal line scans**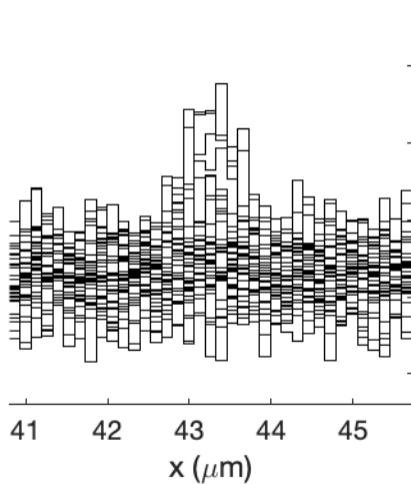**Vertical line scans**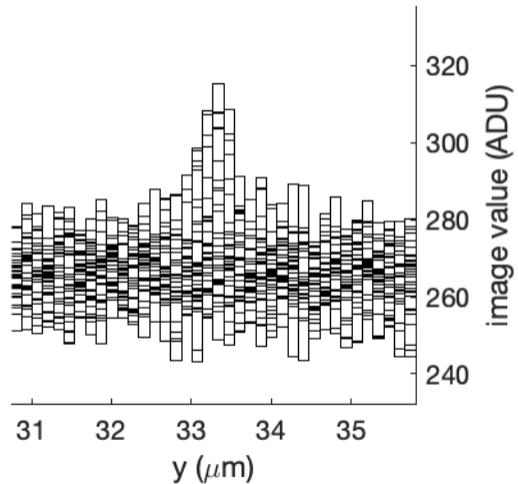

**Image frame 14**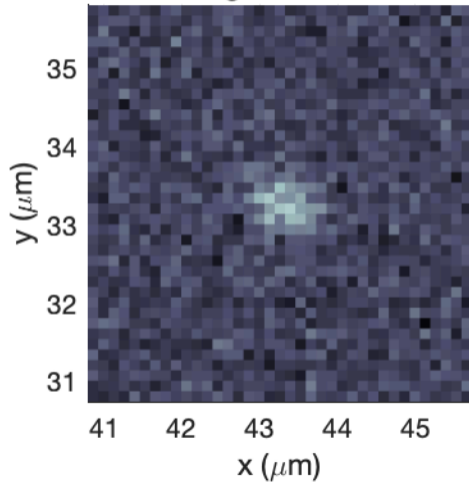**Horizontal line scans**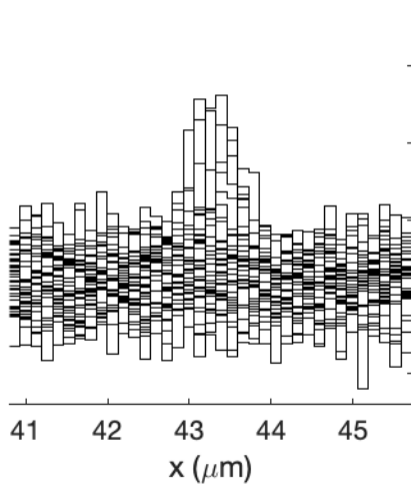**Vertical line scans**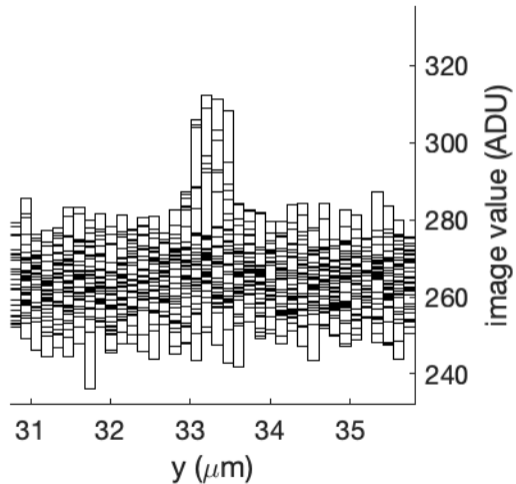

**Image frame 15**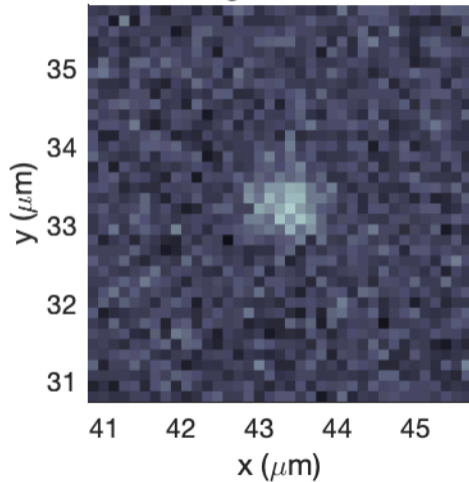**Horizontal line scans**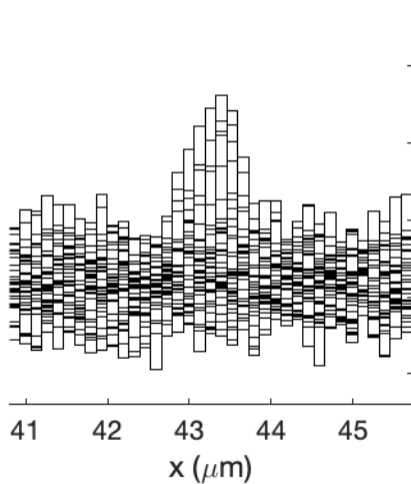**Vertical line scans**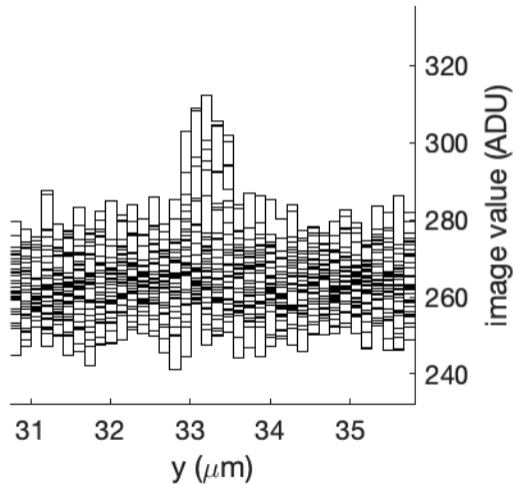

**Image frame 16**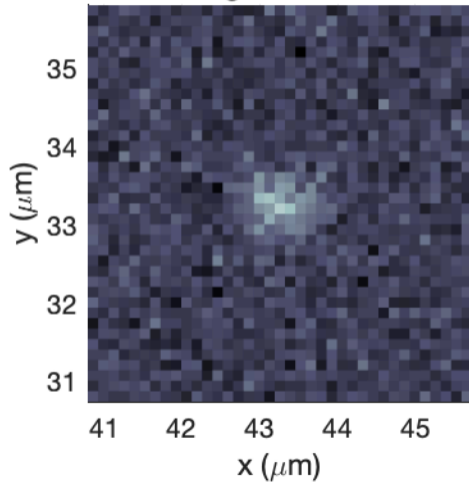**Horizontal line scans**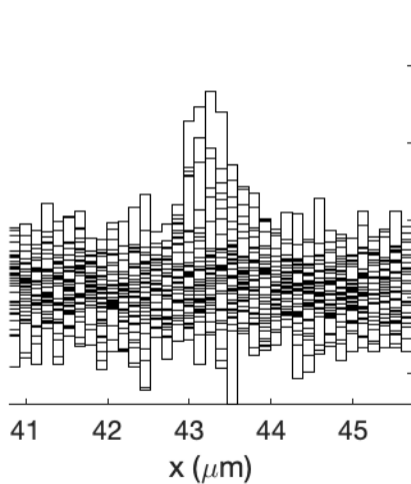**Vertical line scans**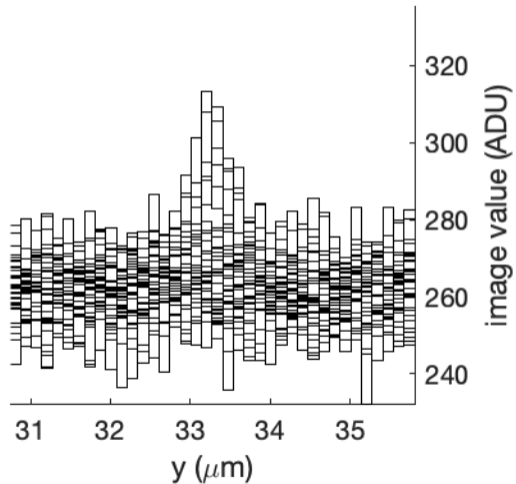

**Image frame 17**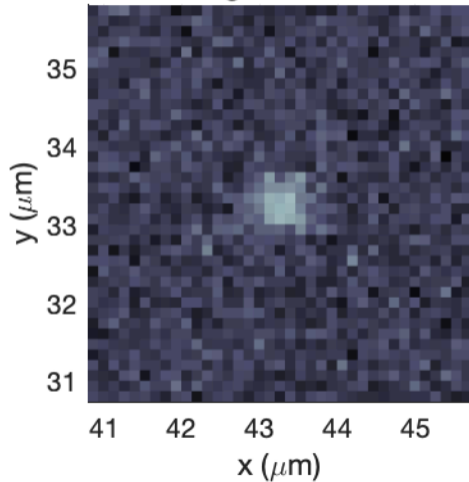**Horizontal line scans**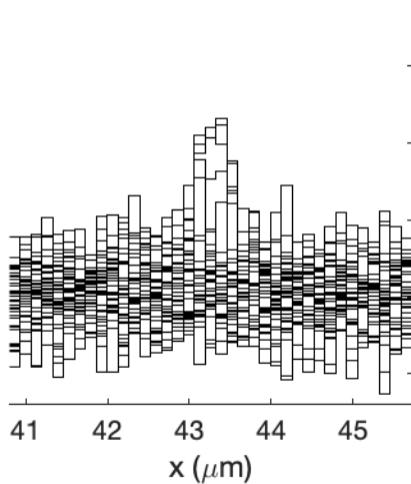**Vertical line scans**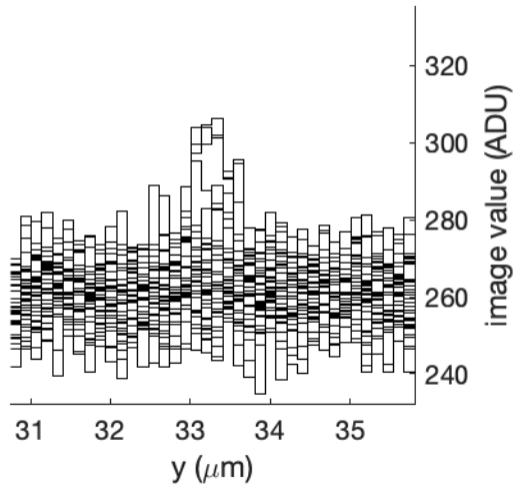

**Image frame 18**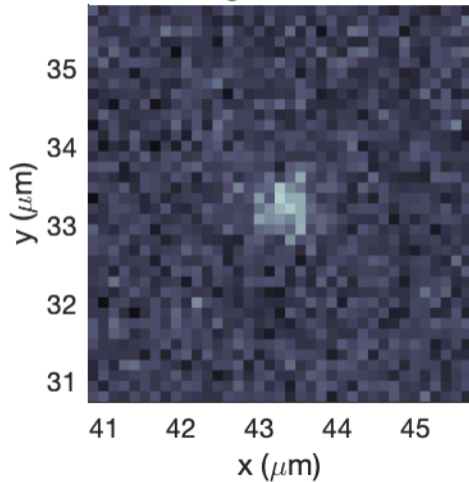**Horizontal line scans**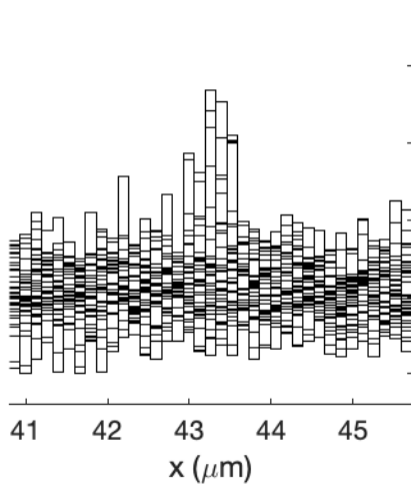**Vertical line scans**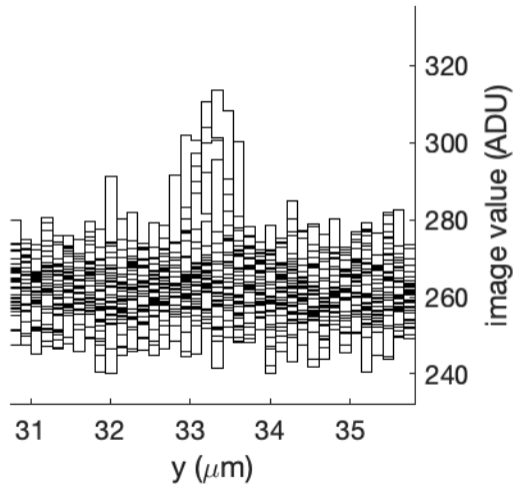

**Image frame 19**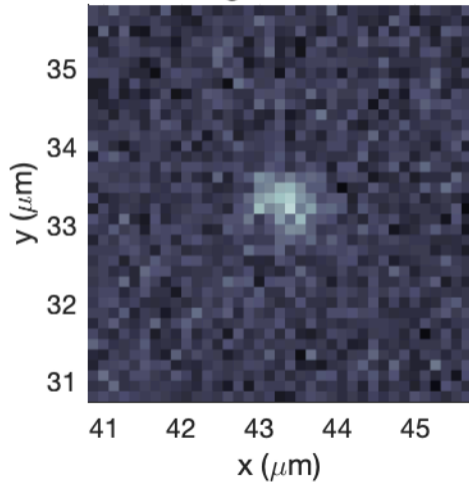**Horizontal line scans**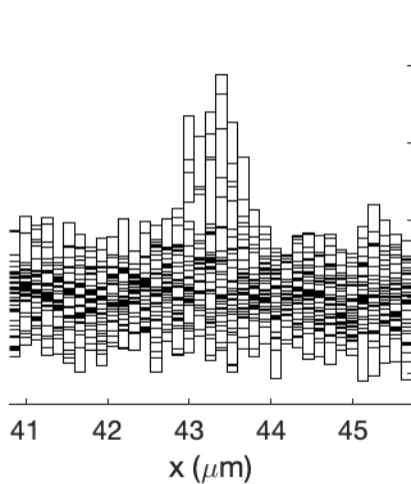**Vertical line scans**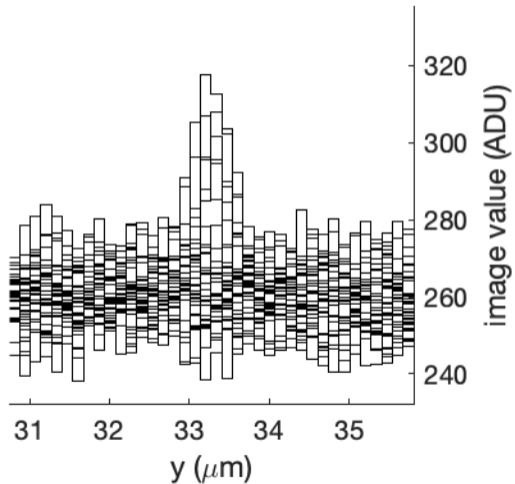

**Image frame 20**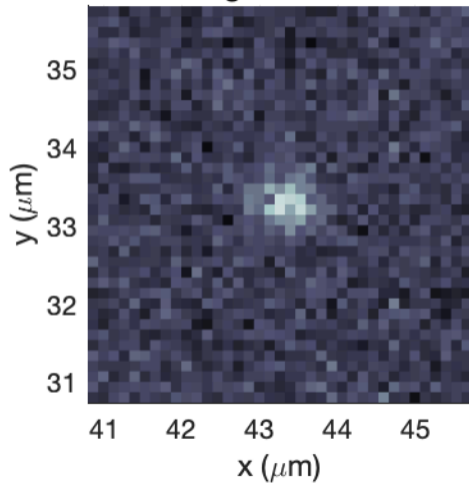**Horizontal line scans**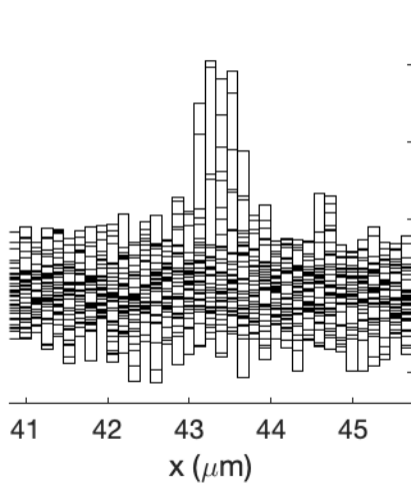**Vertical line scans**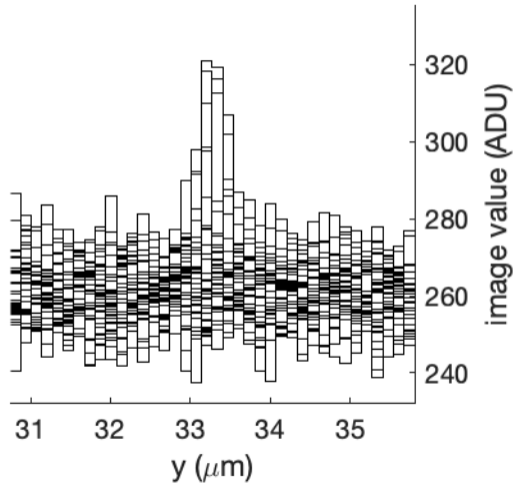



**Image frame 21**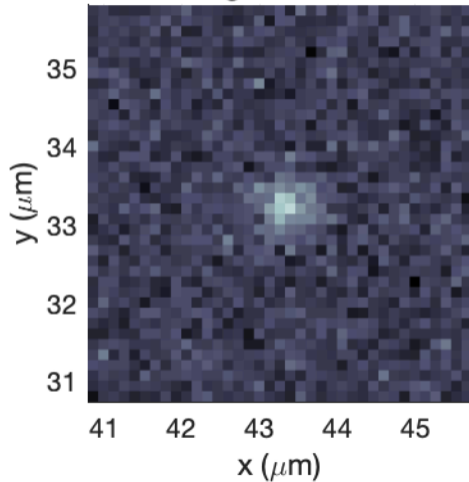**Horizontal line scans**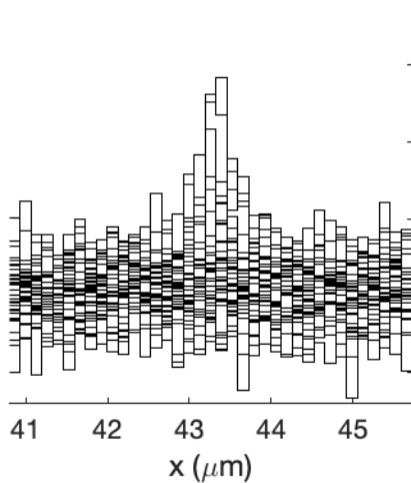**Vertical line scans**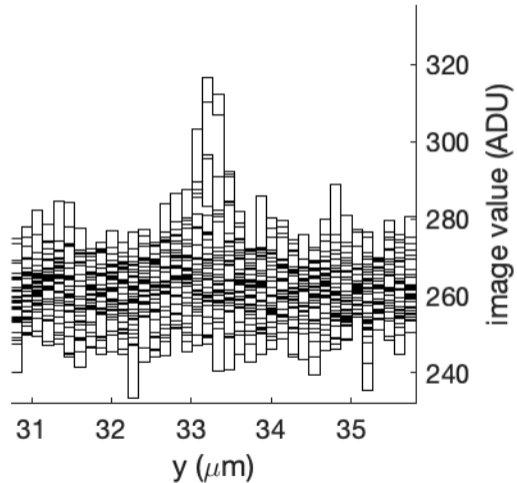

**Image frame 22**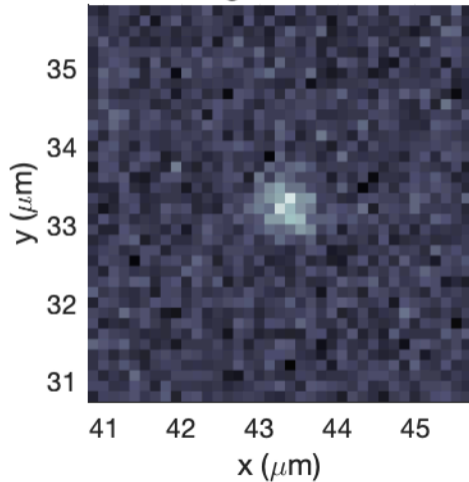**Horizontal line scans**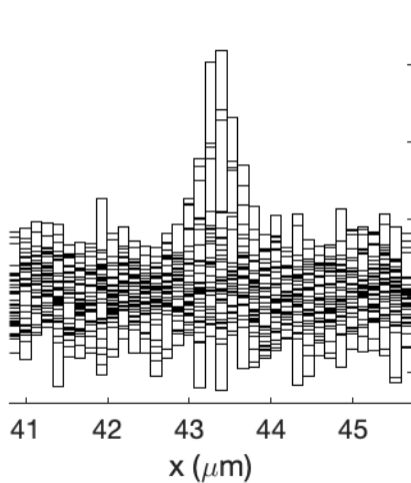**Vertical line scans**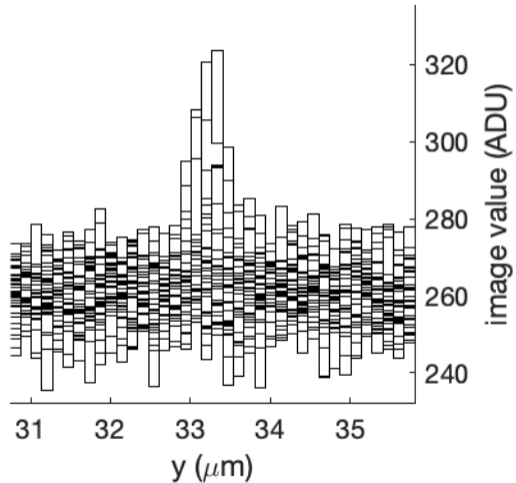

**Image frame 1**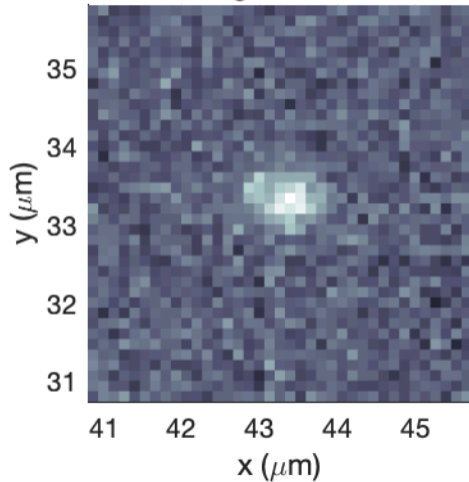**Horizontal line scans**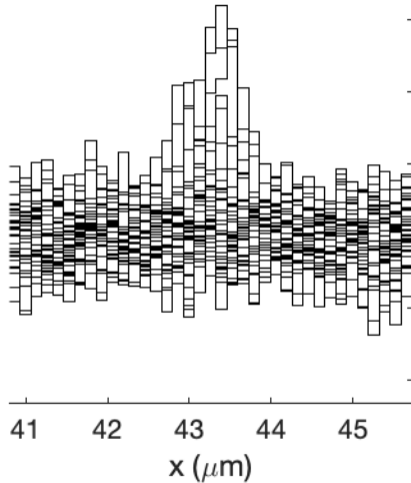**Vertical line scans**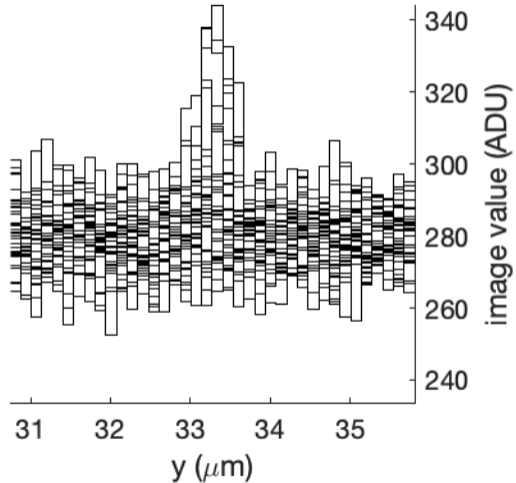

**Image frame 2**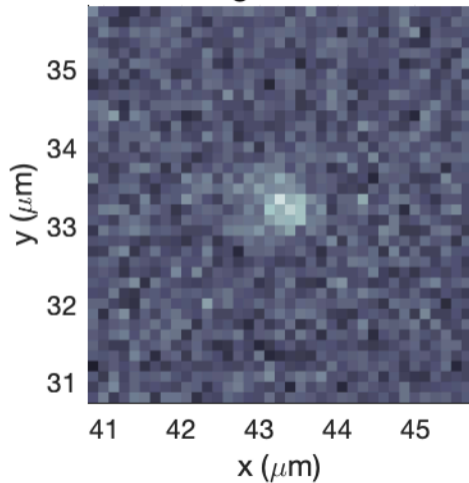**Horizontal line scans**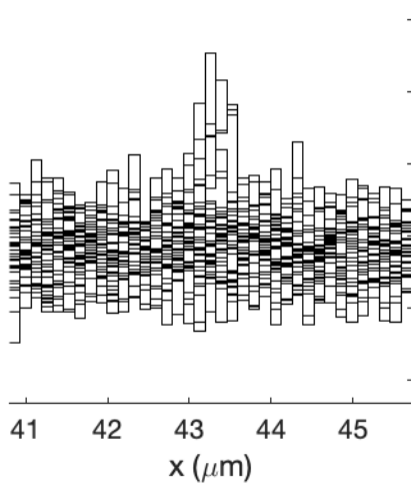**Vertical line scans**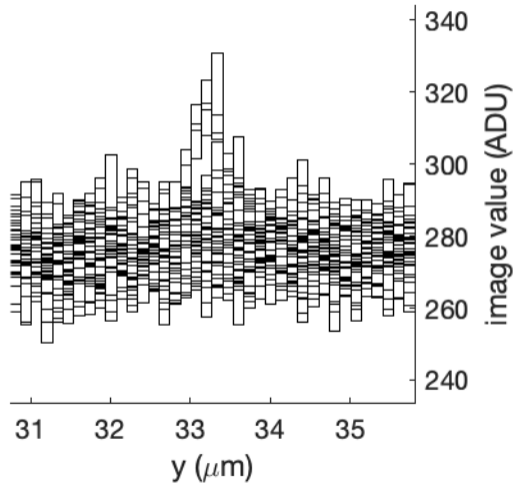

**Image frame 3**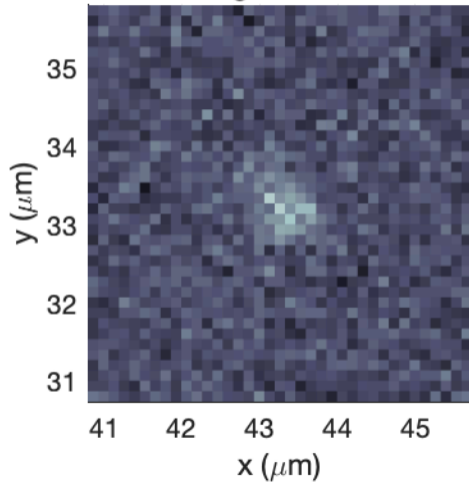**Horizontal line scans**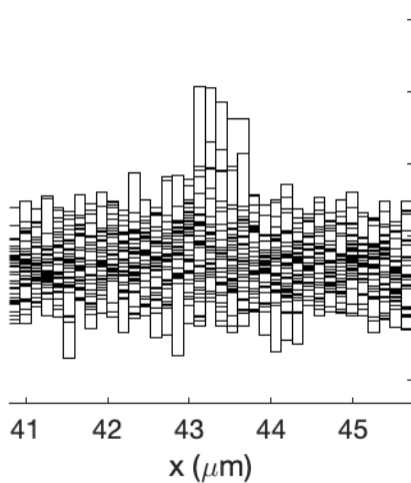**Vertical line scans**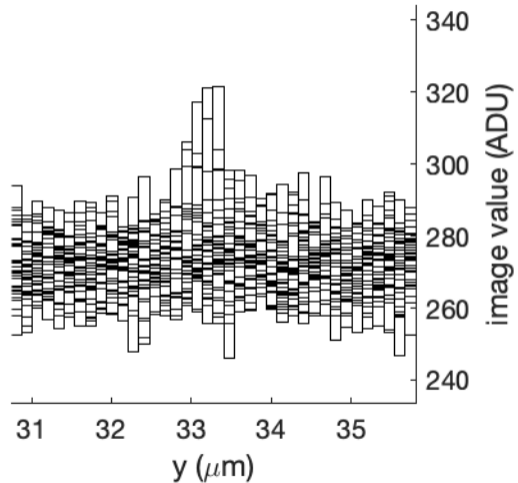

**Image frame 4**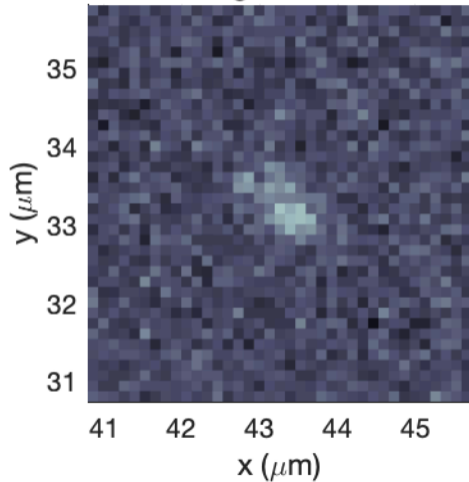**Horizontal line scans**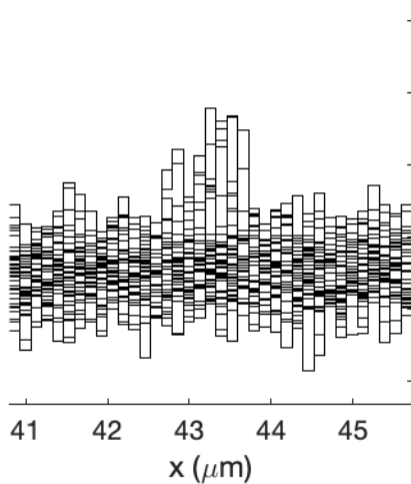**Vertical line scans**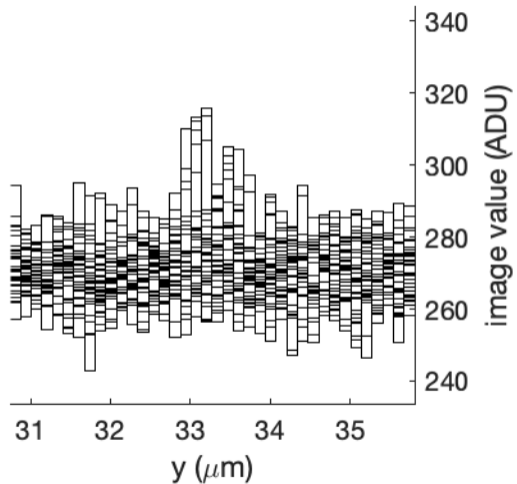

**Image frame 5**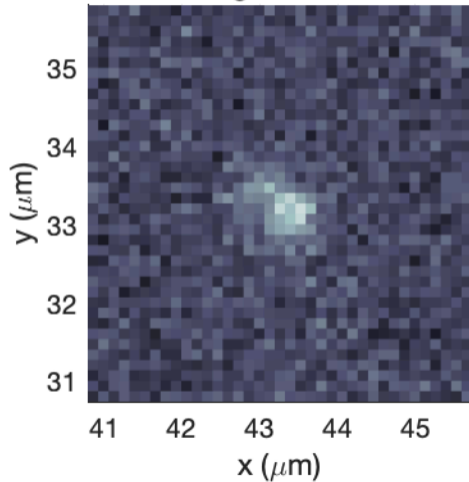**Horizontal line scans**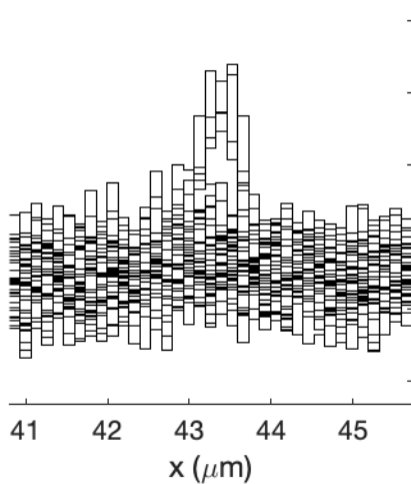**Vertical line scans**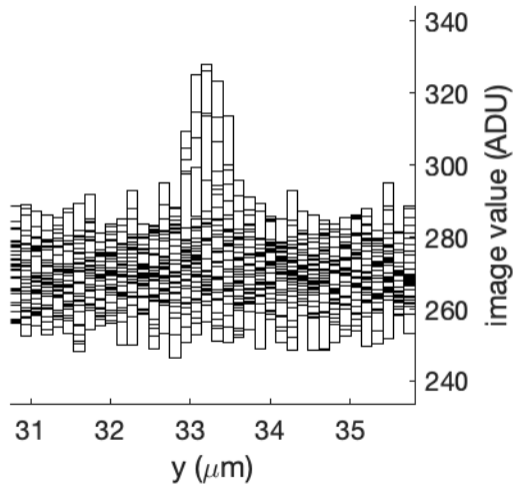

**Image frame 6**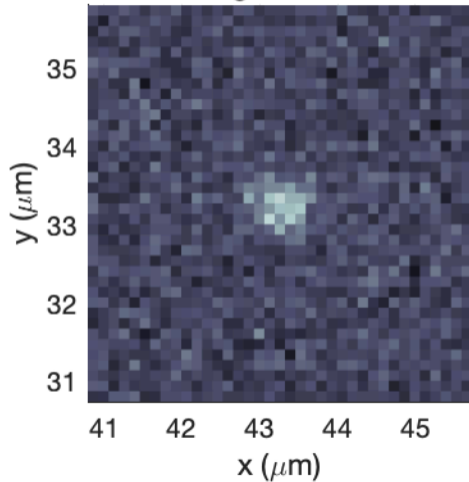**Horizontal line scans**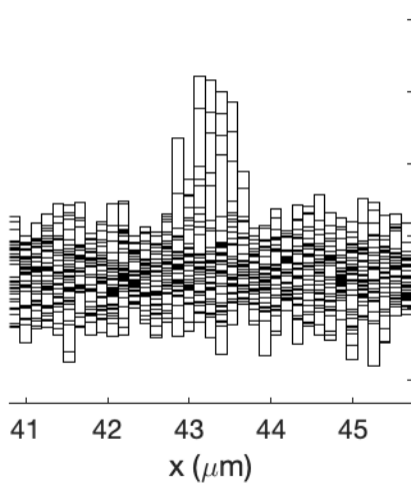**Vertical line scans**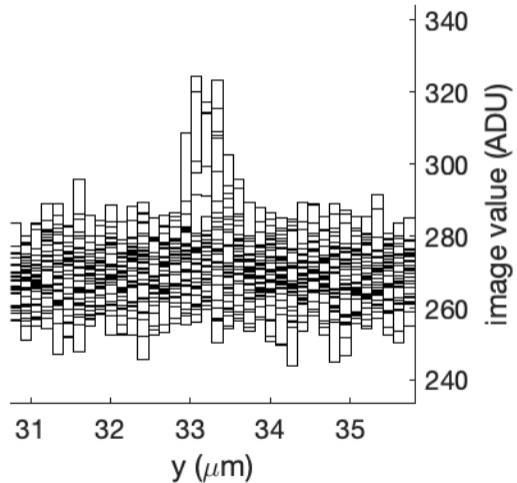



**Image frame 7**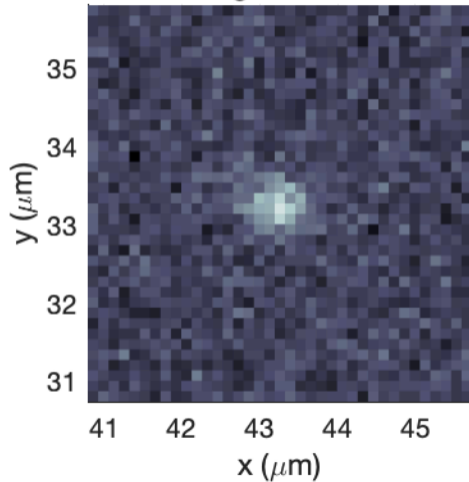**Horizontal line scans**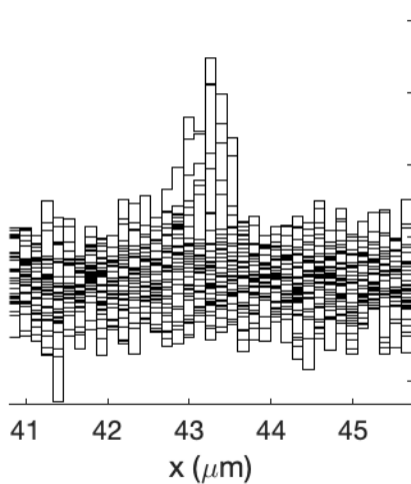**Vertical line scans**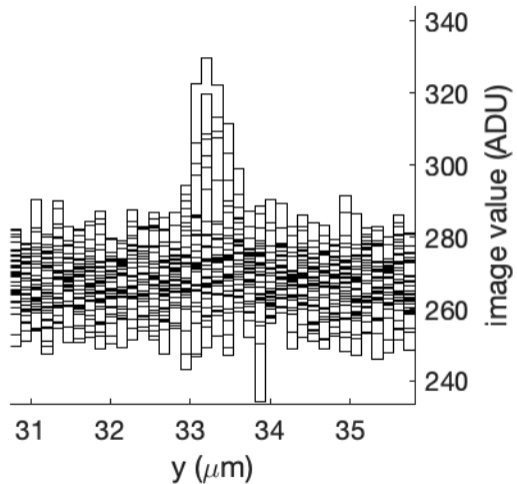

**Image frame 8**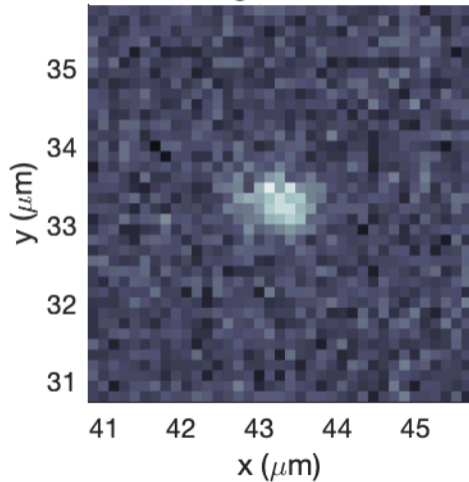**Horizontal line scans**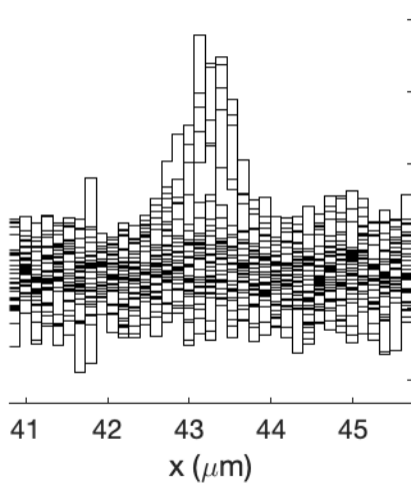**Vertical line scans**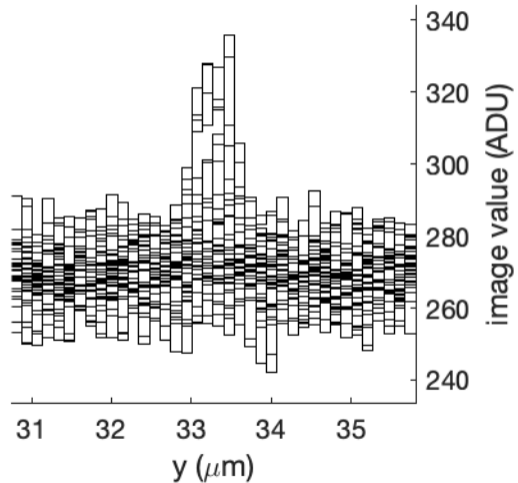

**Image frame 9**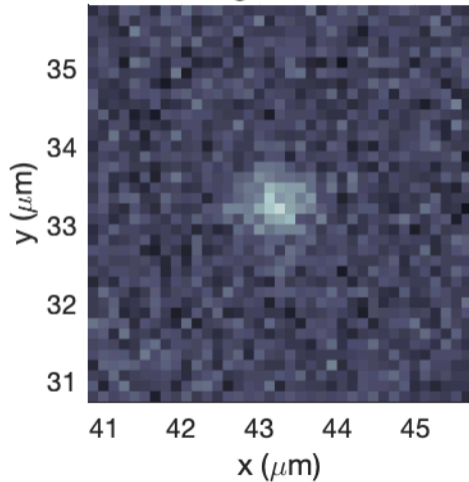**Horizontal line scans**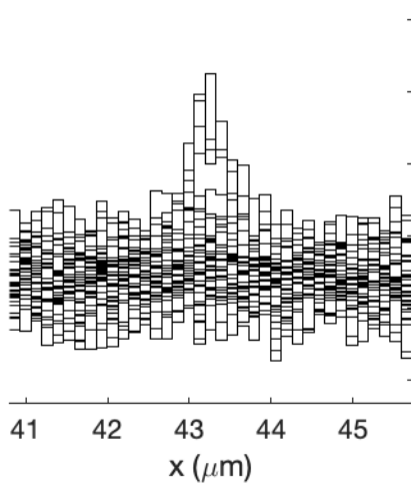**Vertical line scans**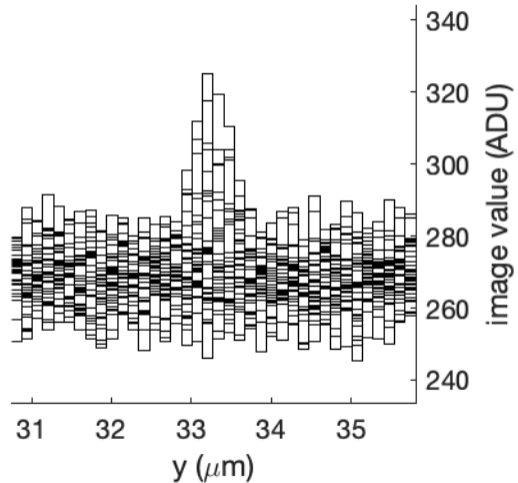

**Image frame 10**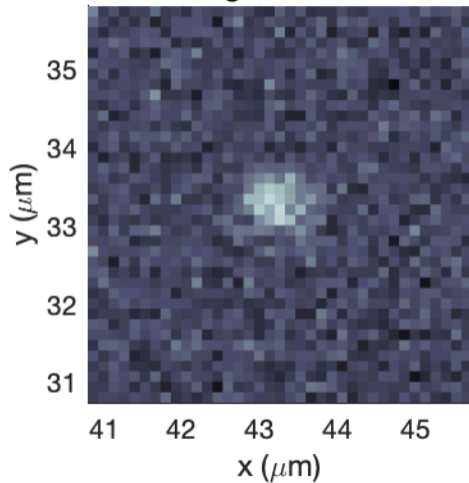**Horizontal line scans**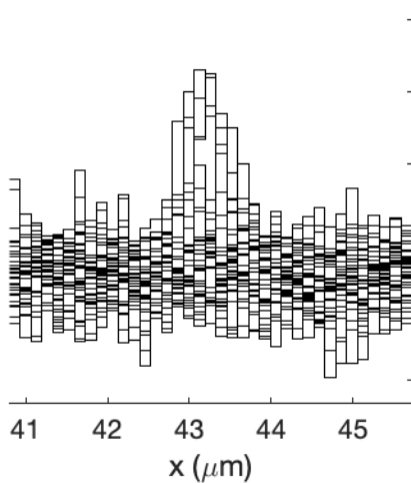**Vertical line scans**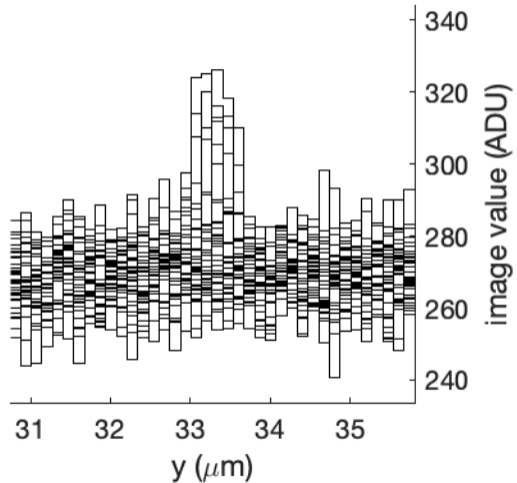

**Image frame 11**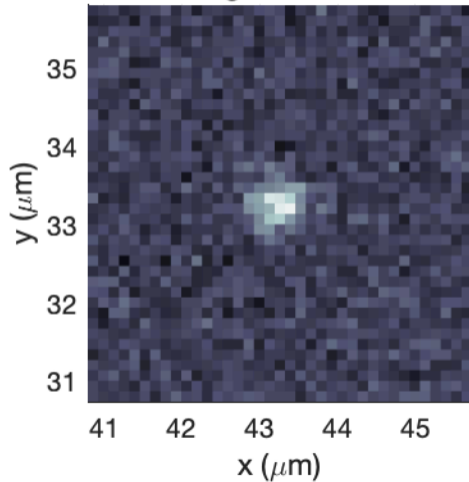**Horizontal line scans**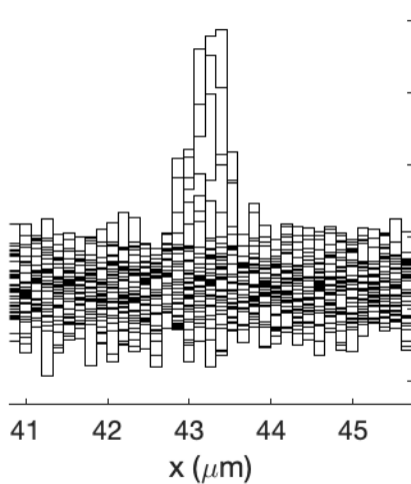**Vertical line scans**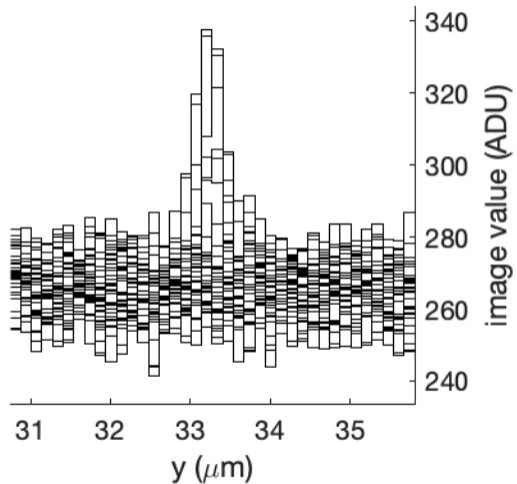

**Image frame 12**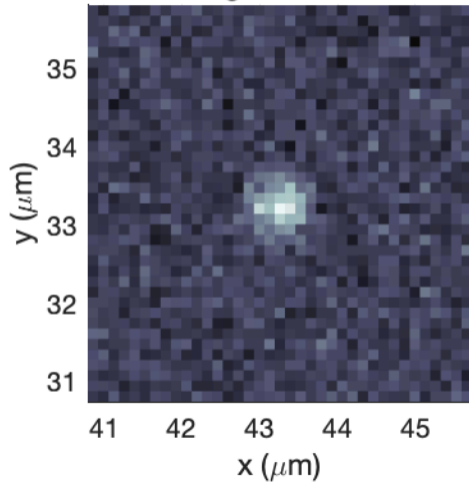**Horizontal line scans**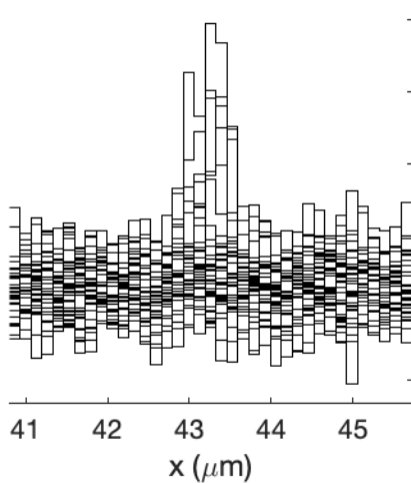**Vertical line scans**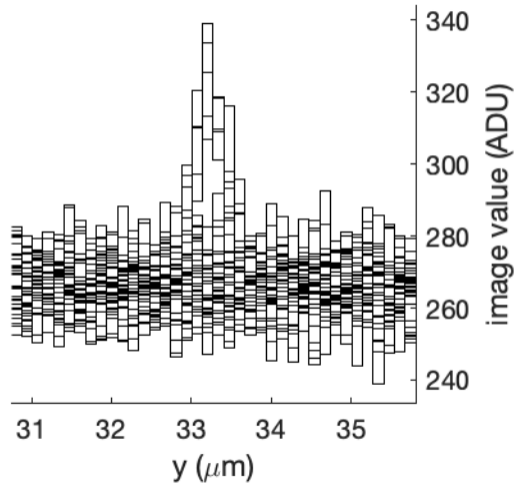

**Image frame 13**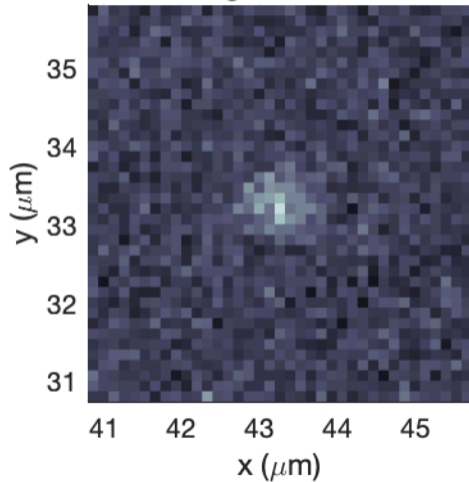**Horizontal line scans**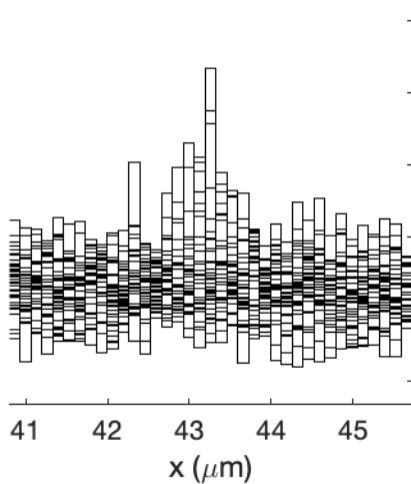**Vertical line scans**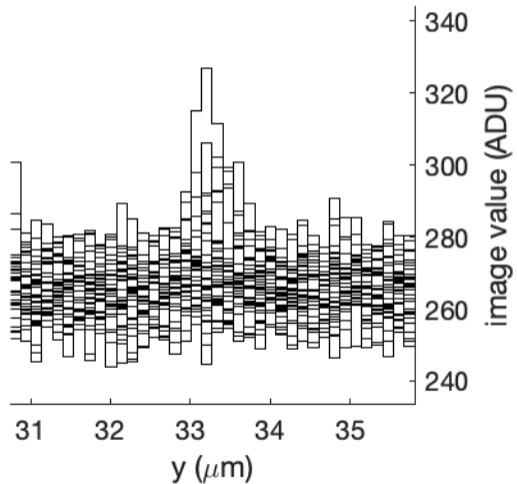

**Image frame 14**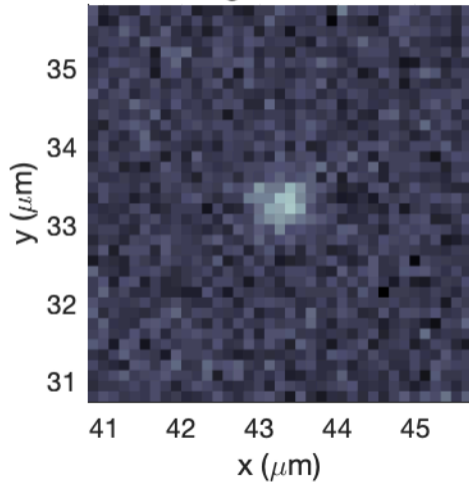**Horizontal line scans**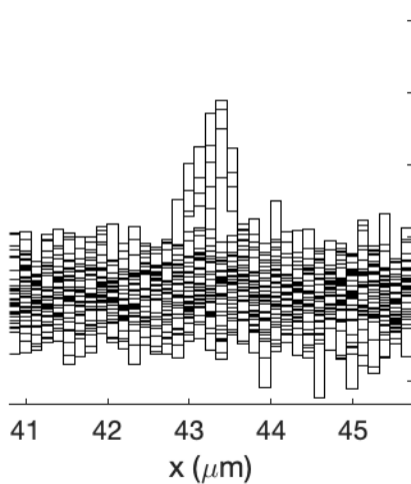**Vertical line scans**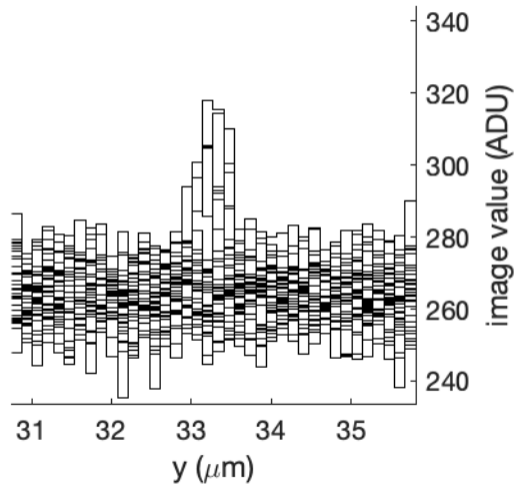



**Image frame 15**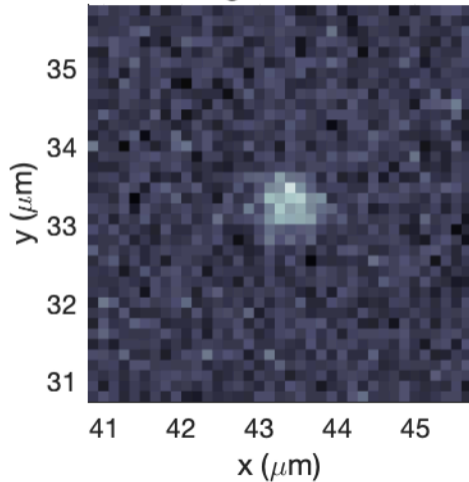**Horizontal line scans**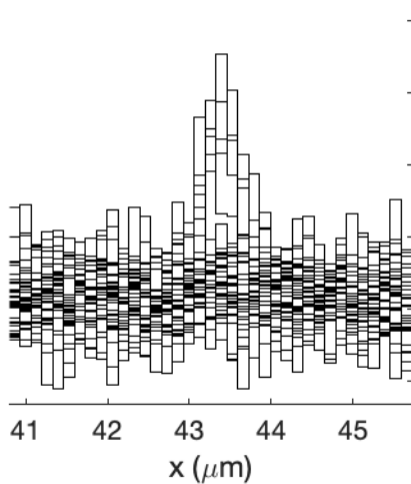**Vertical line scans**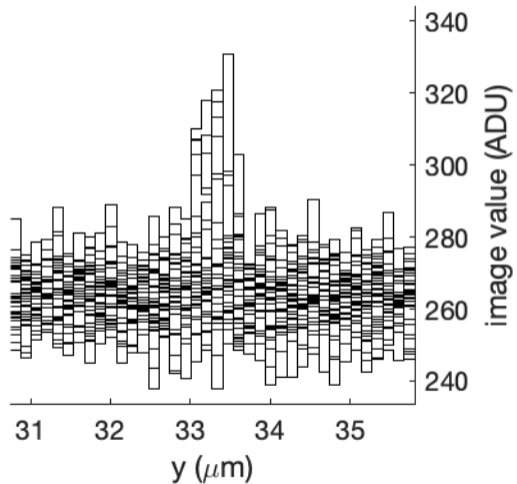

**Image frame 16**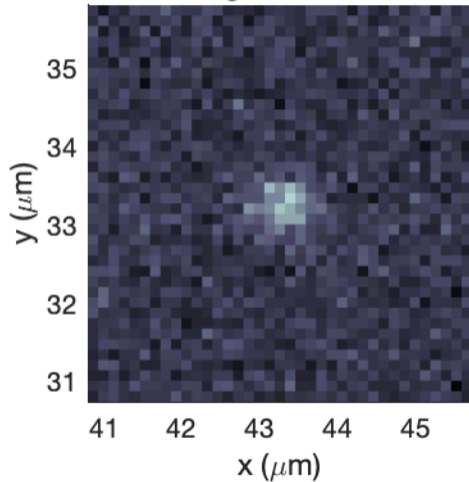**Horizontal line scans**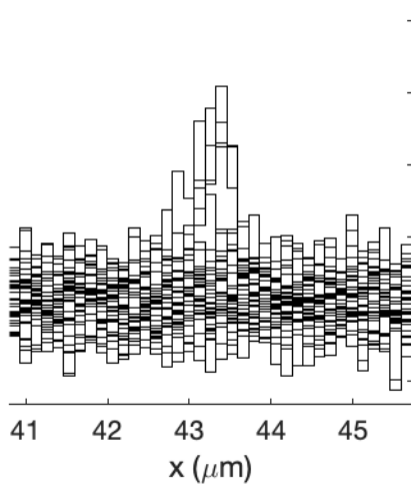**Vertical line scans**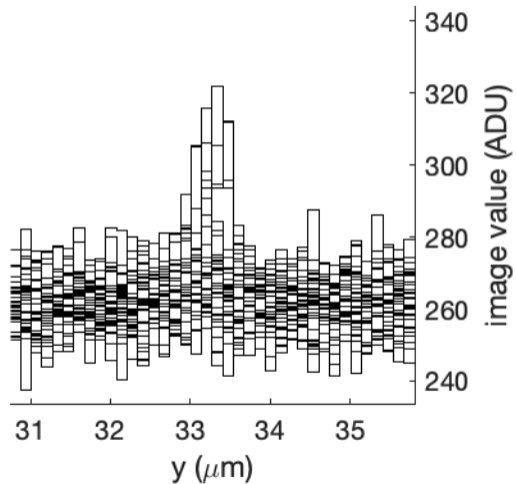

**Image frame 17**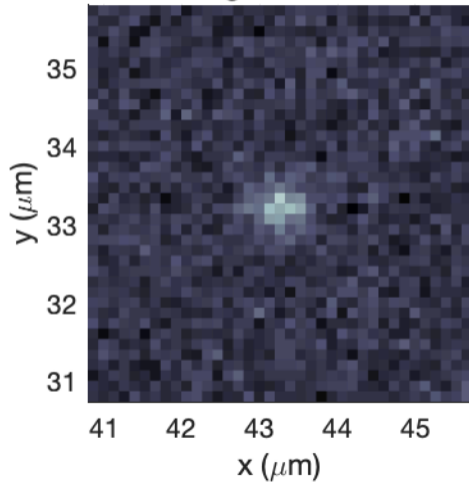**Horizontal line scans**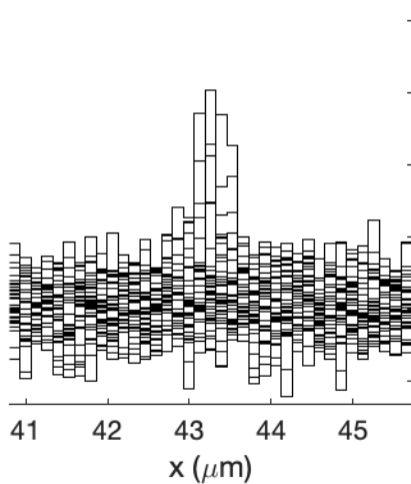**Vertical line scans**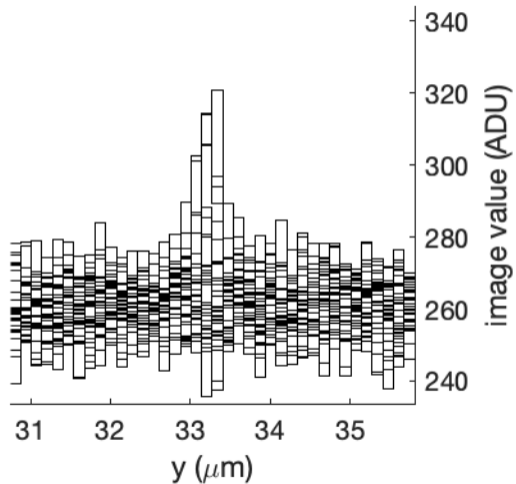

**Image frame 18**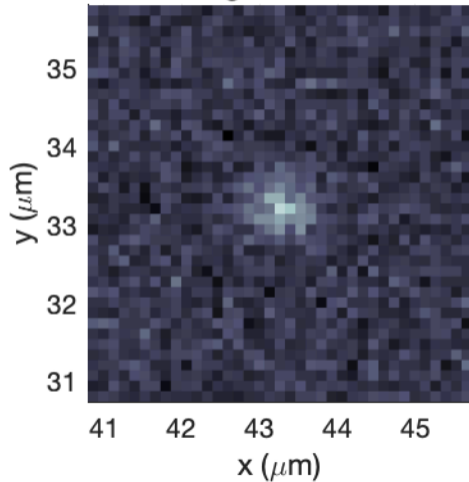**Horizontal line scans**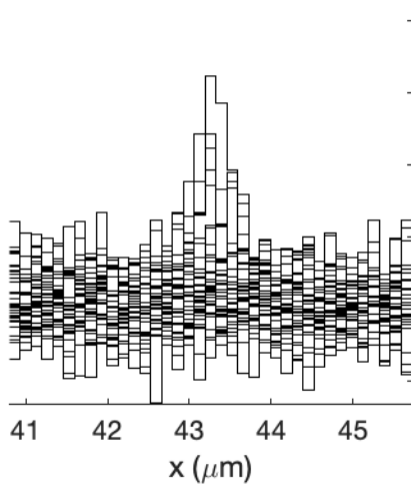**Vertical line scans**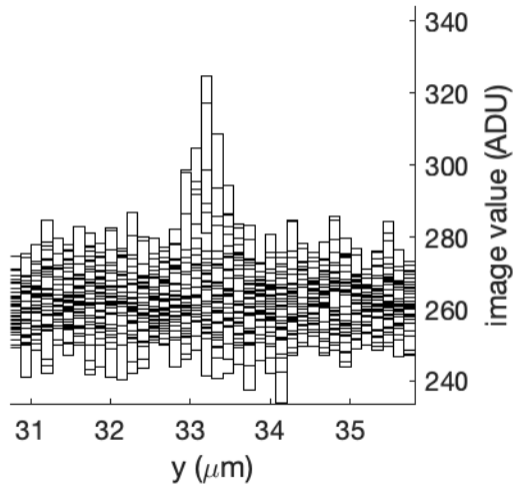

**Image frame 19**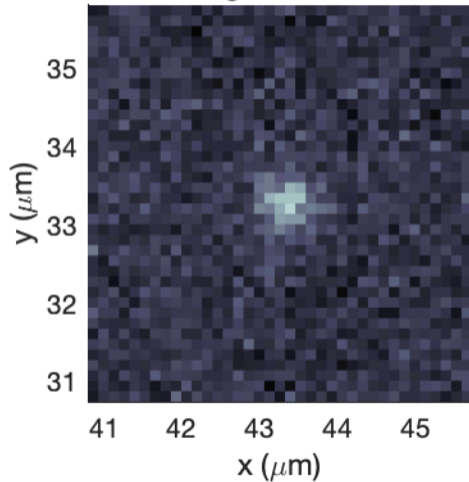**Horizontal line scans**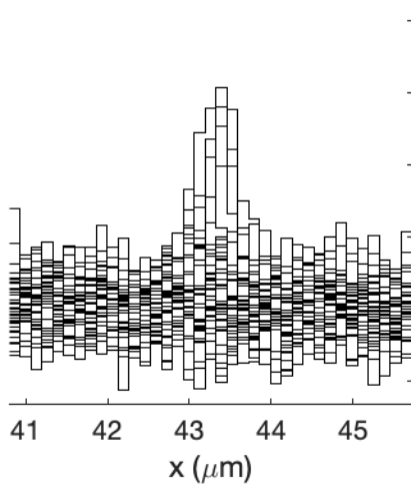**Vertical line scans**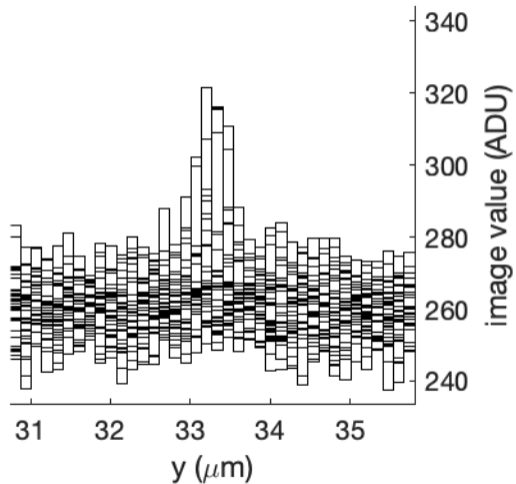

**Image frame 20**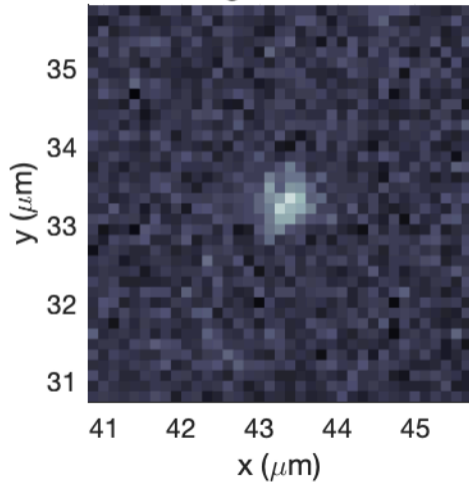**Horizontal line scans**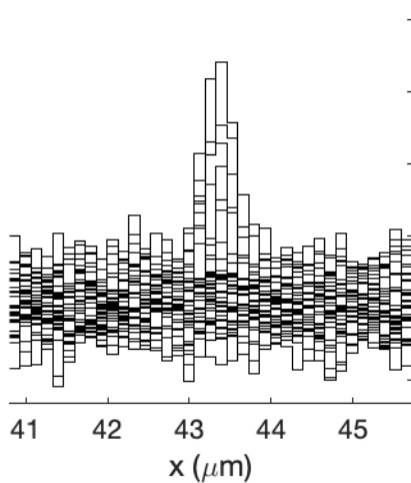**Vertical line scans**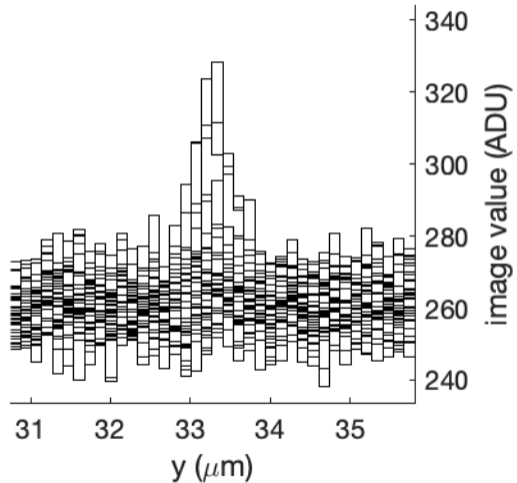

**Image frame 21**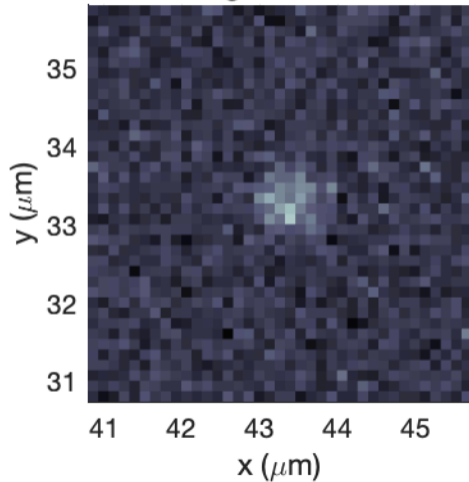**Horizontal line scans**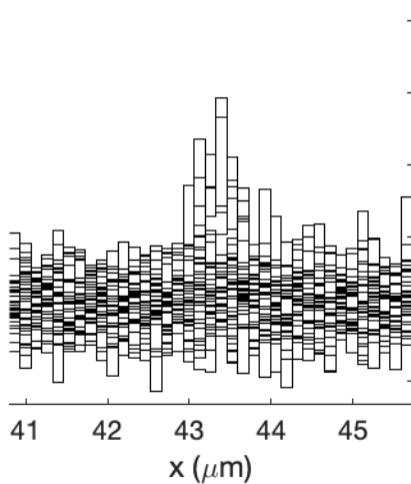**Vertical line scans**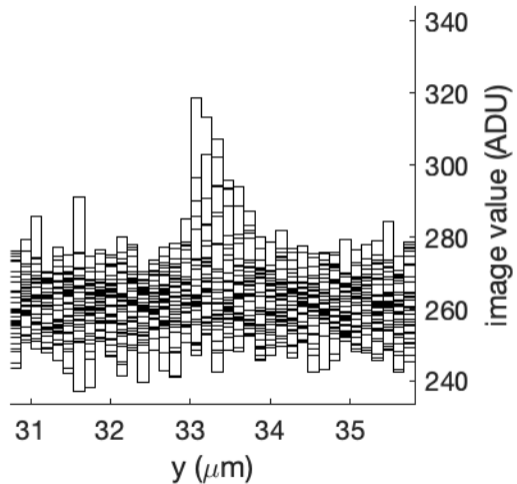

**Image frame 22**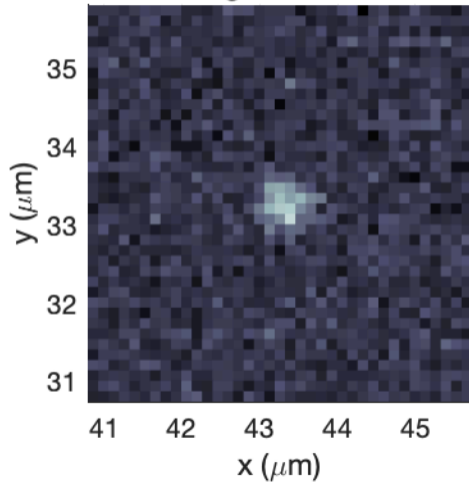**Horizontal line scans**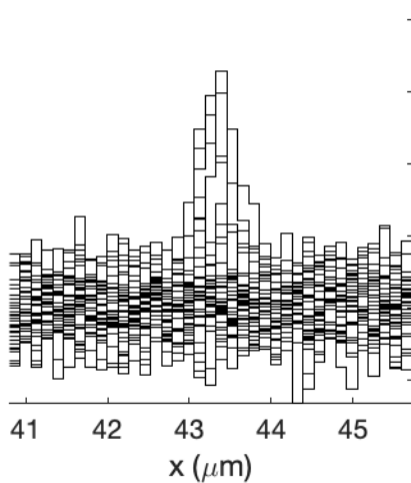**Vertical line scans**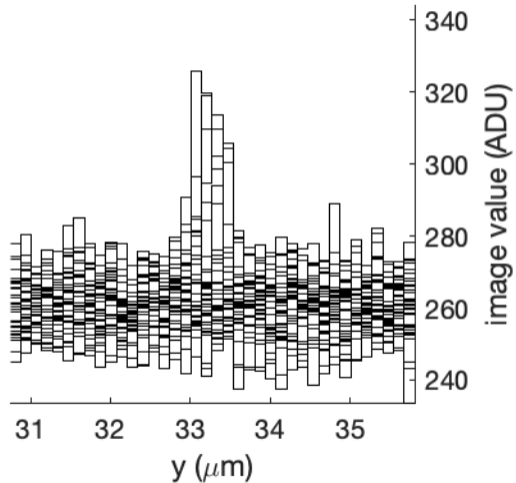



**Image frame 1**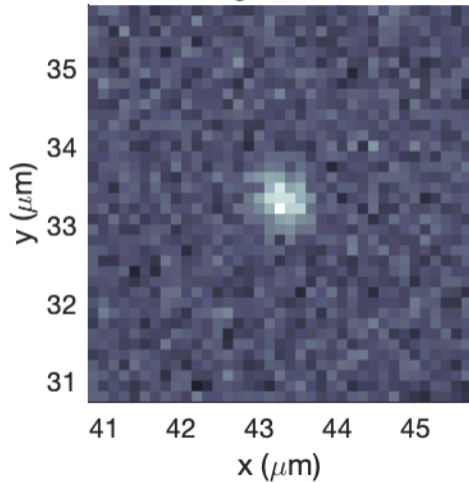**Horizontal line scans**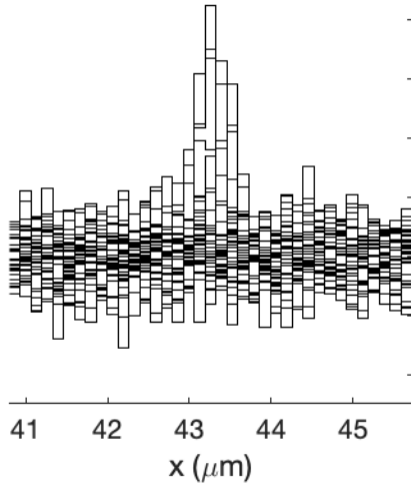**Vertical line scans**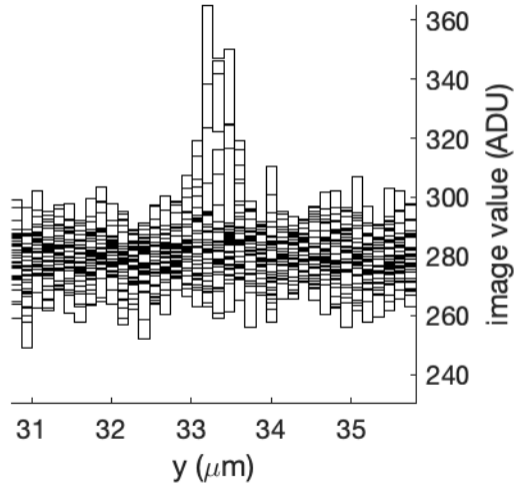

**Image frame 2**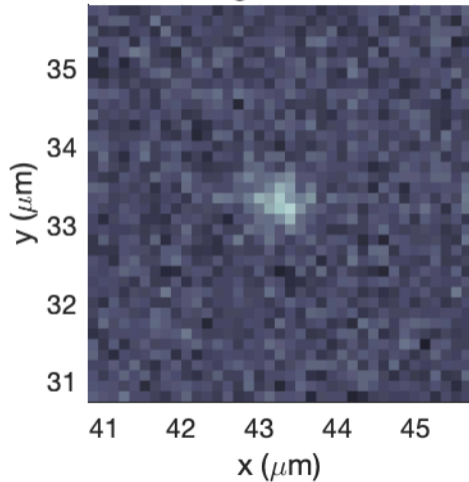**Horizontal line scans**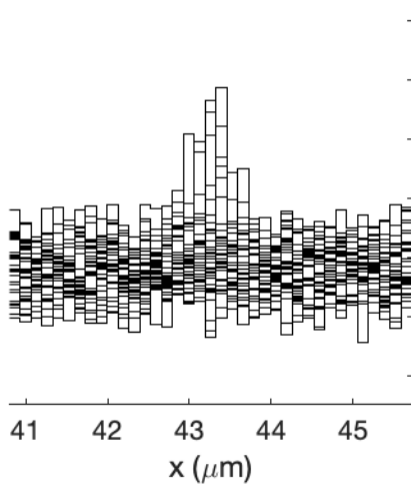**Vertical line scans**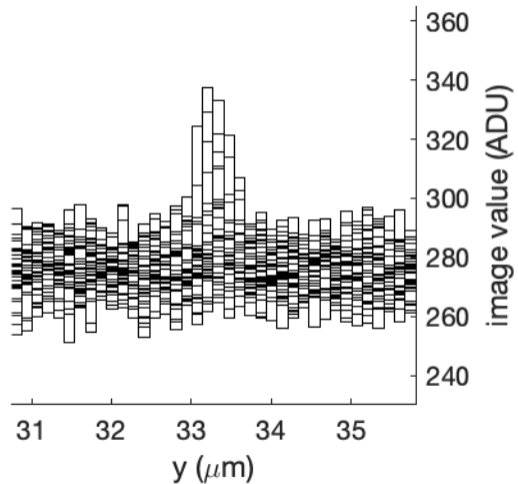

**Image frame 3**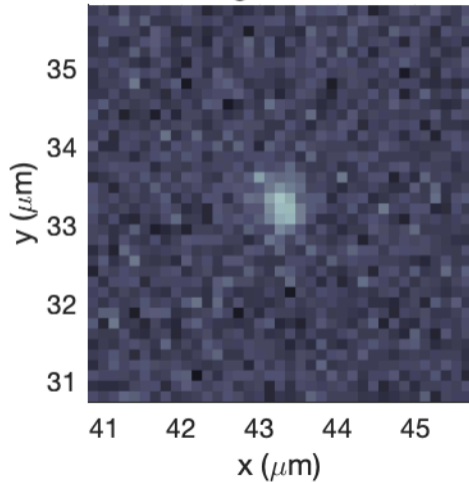**Horizontal line scans**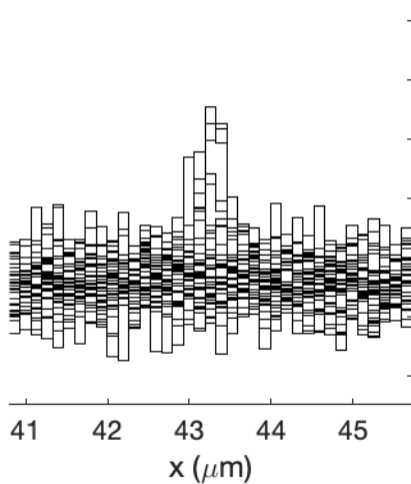**Vertical line scans**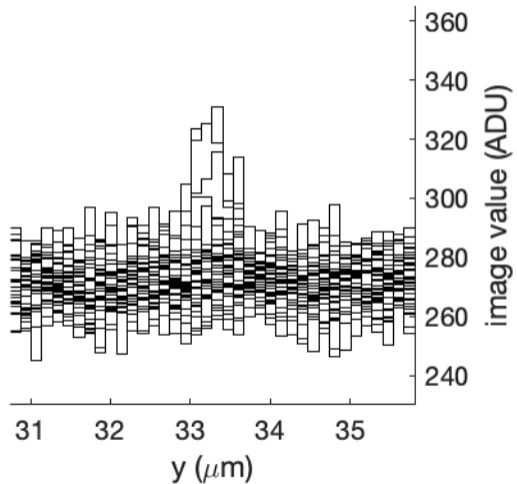

**Image frame 4**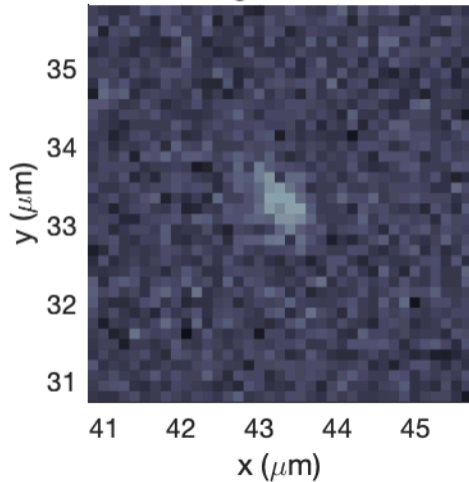**Horizontal line scans**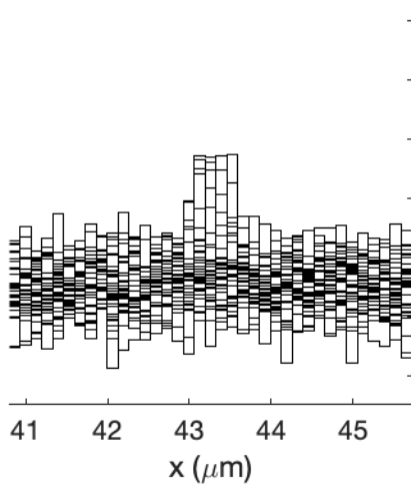**Vertical line scans**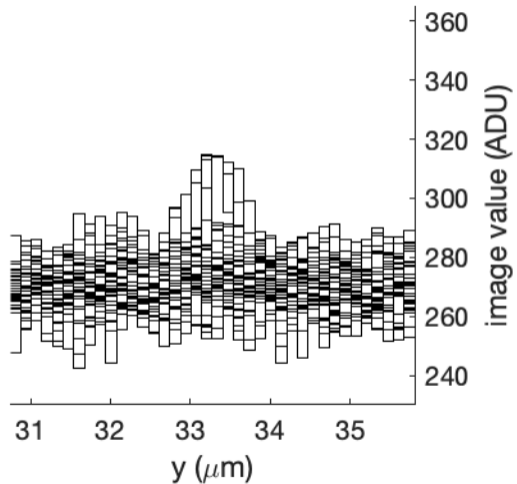

**Image frame 5**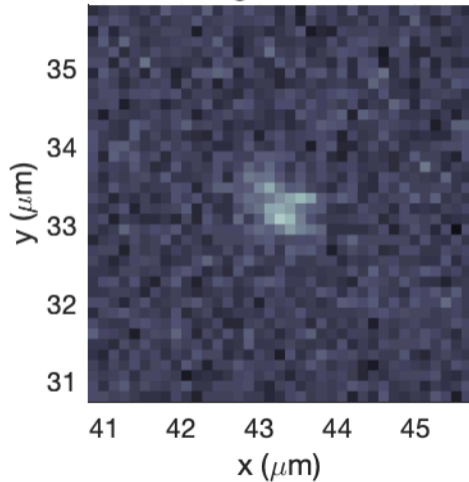**Horizontal line scans**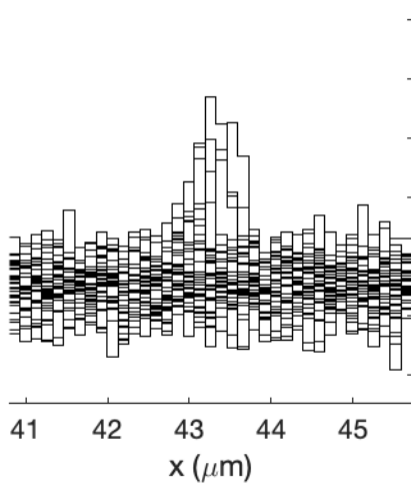**Vertical line scans**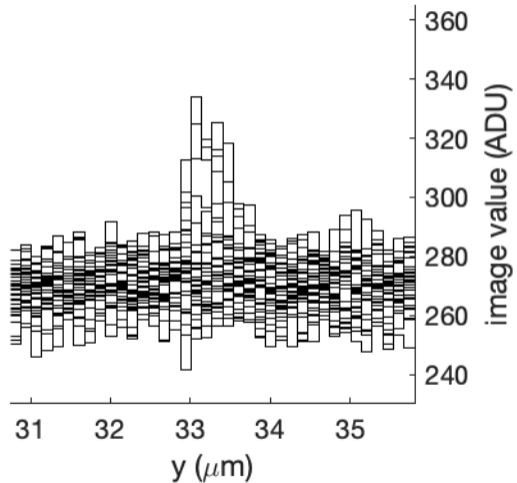

**Image frame 6**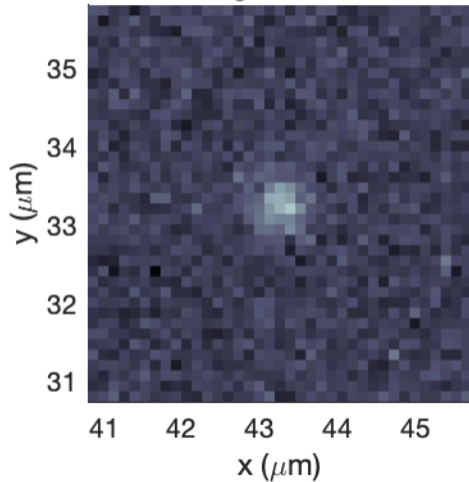**Horizontal line scans**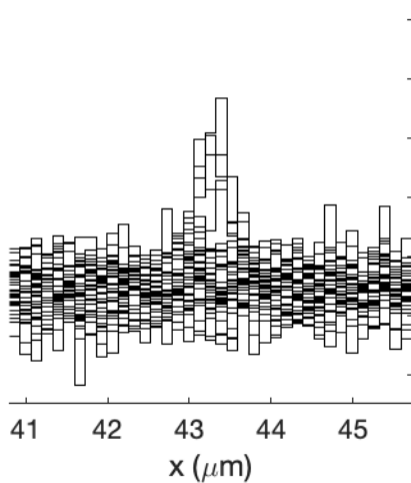**Vertical line scans**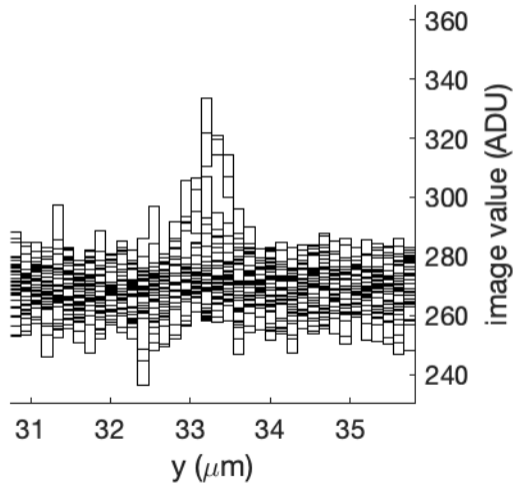

**Image frame 7**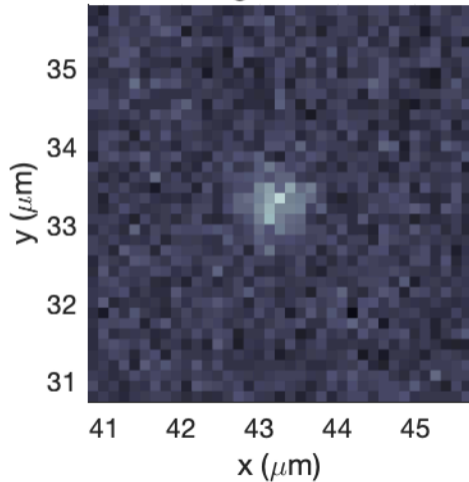**Horizontal line scans**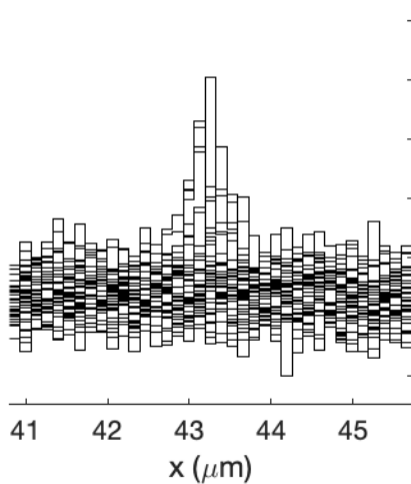**Vertical line scans**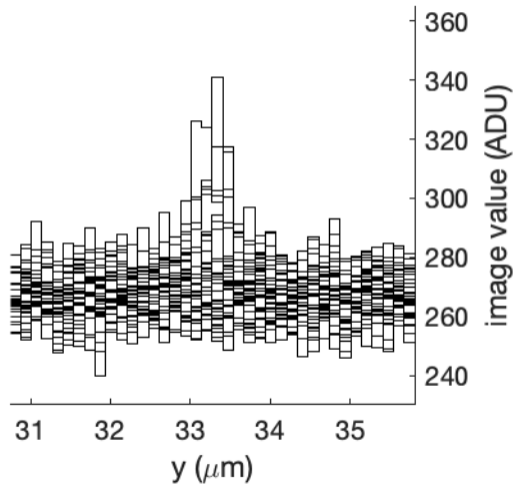

**Image frame 8**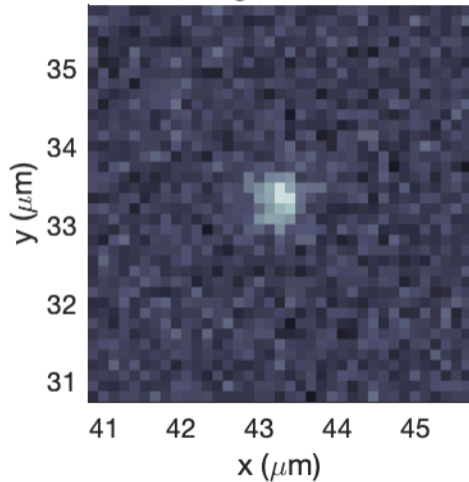**Horizontal line scans**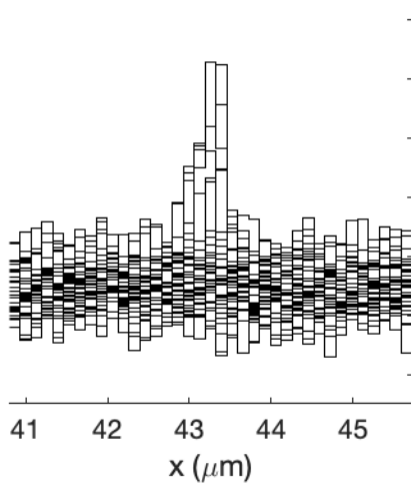**Vertical line scans**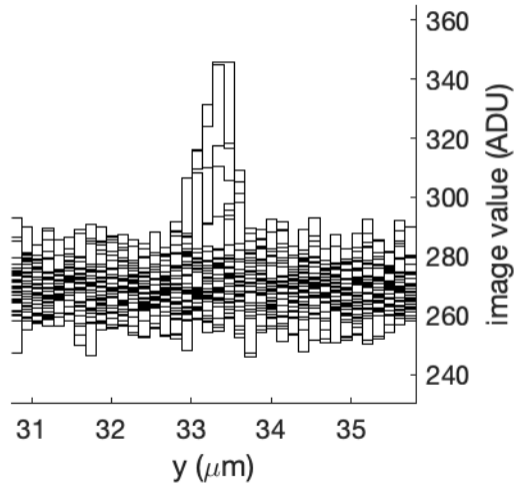



**Image frame 9**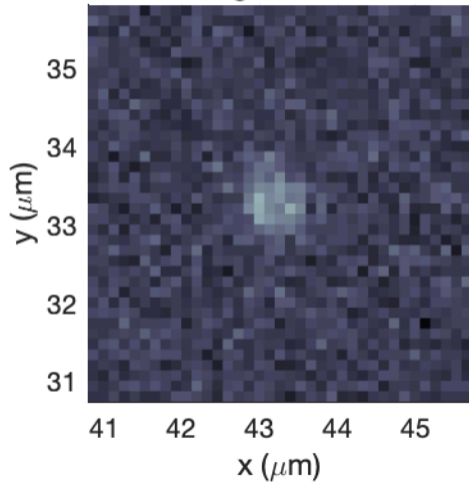**Horizontal line scans**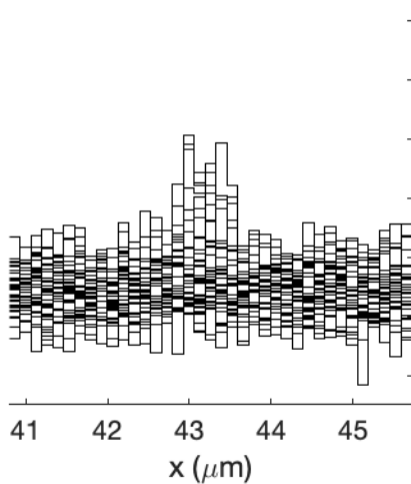**Vertical line scans**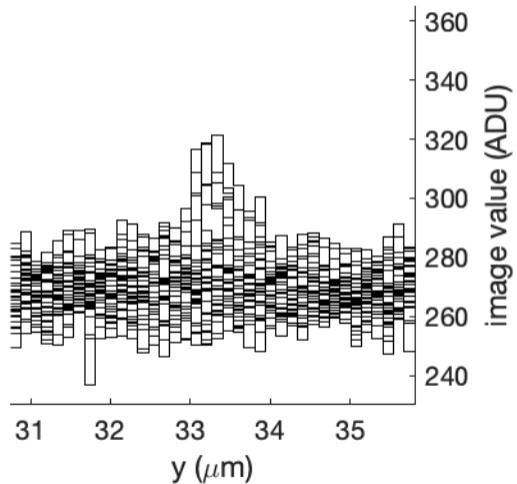

**Image frame 10**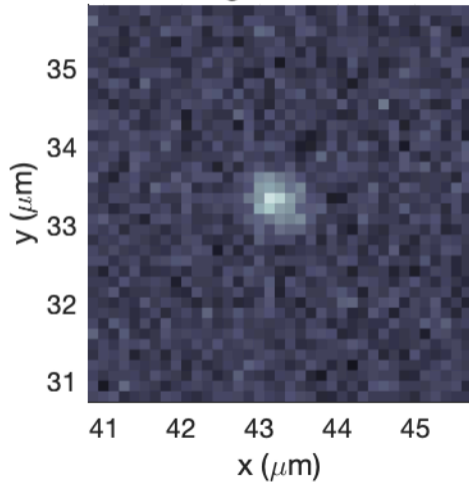**Horizontal line scans**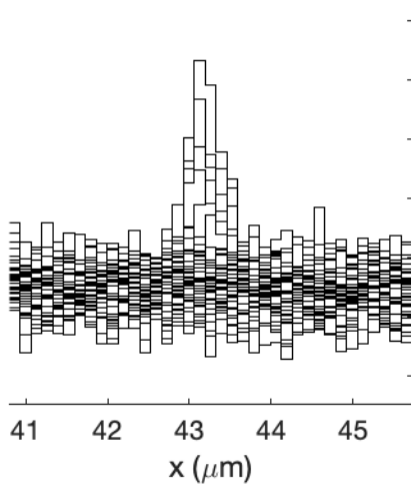**Vertical line scans**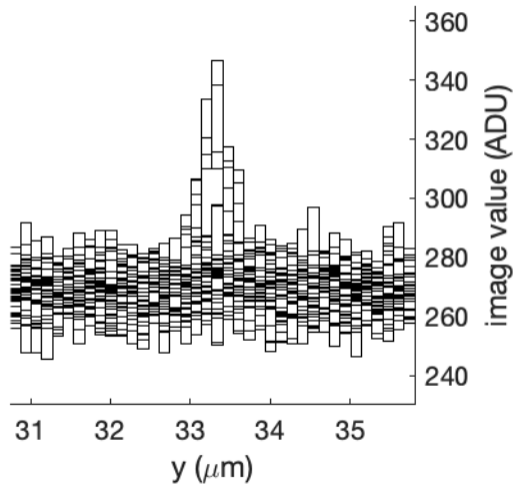

**Image frame 11**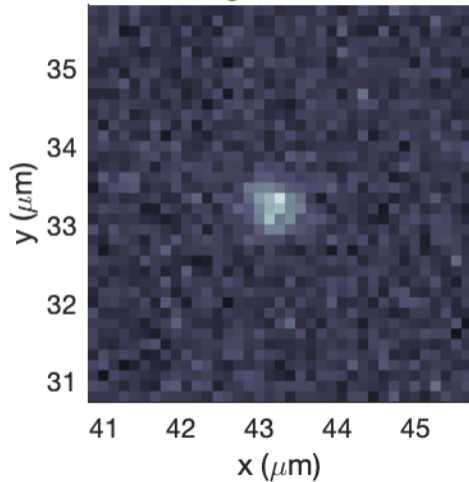**Horizontal line scans**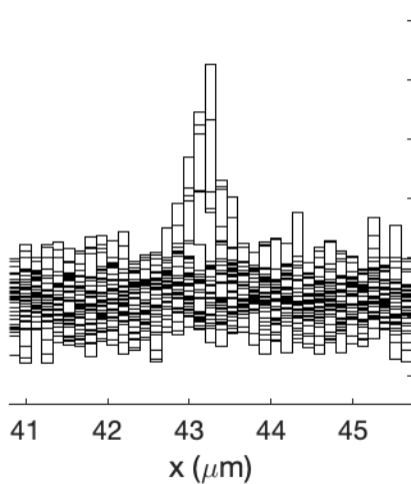**Vertical line scans**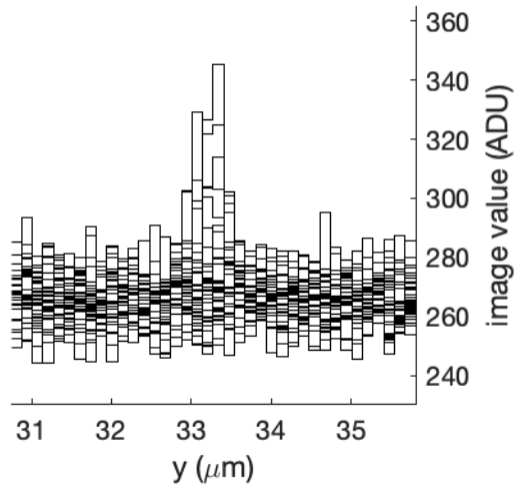

**Image frame 12**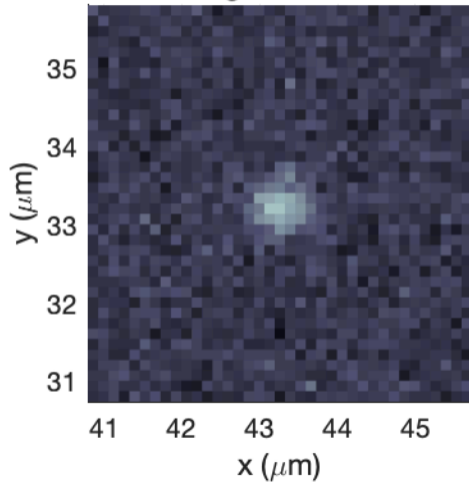**Horizontal line scans**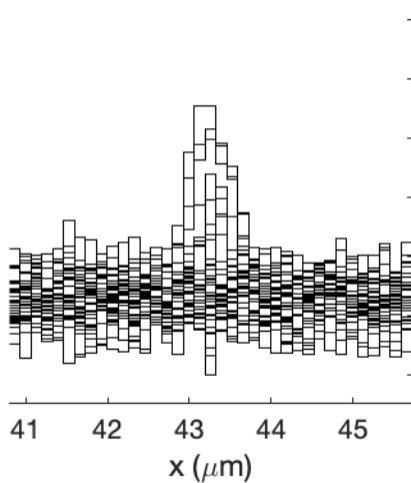**Vertical line scans**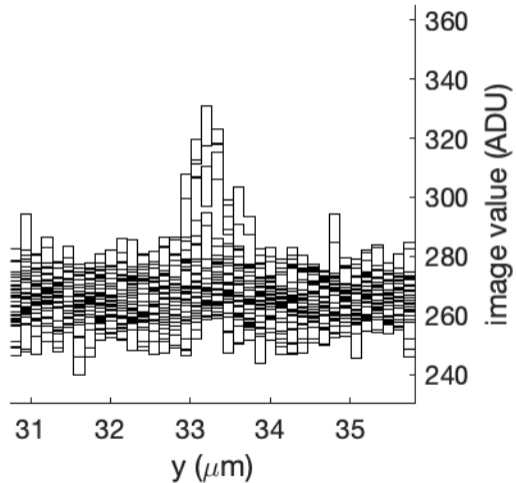

**Image frame 13**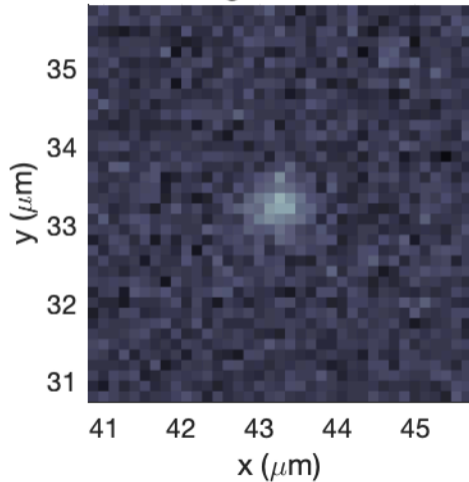**Horizontal line scans**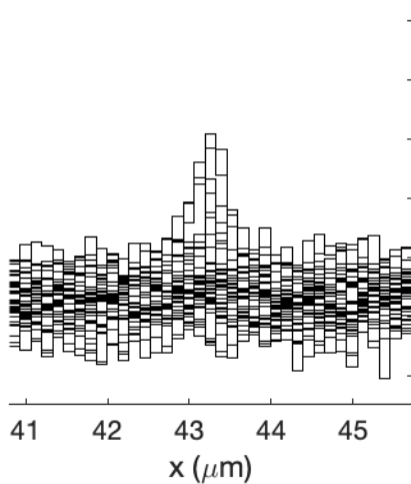**Vertical line scans**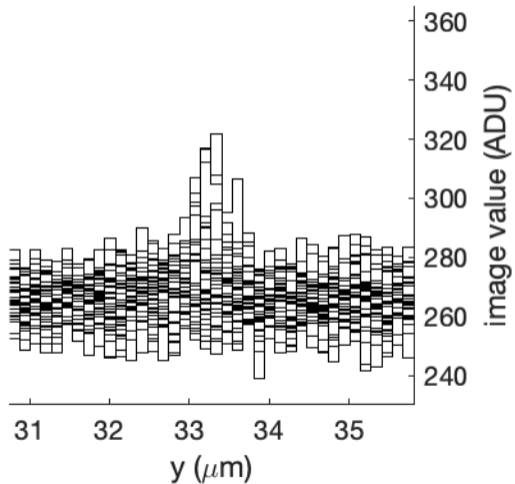

**Image frame 14**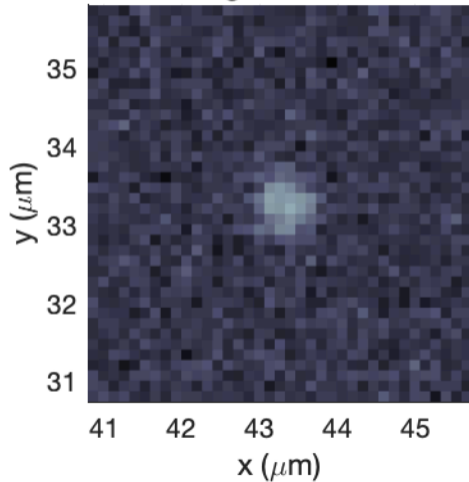**Horizontal line scans**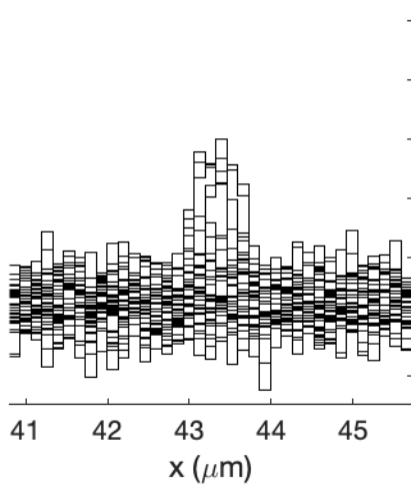**Vertical line scans**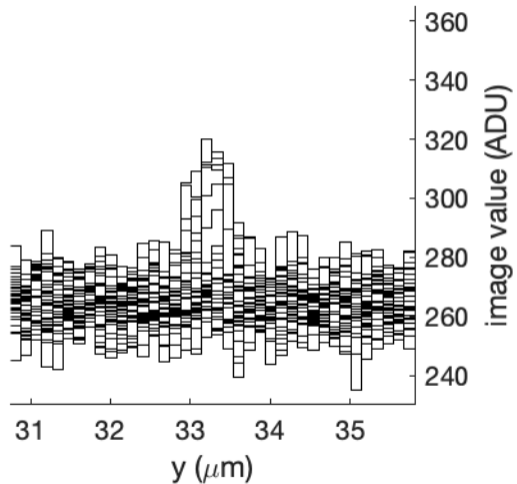

**Image frame 15**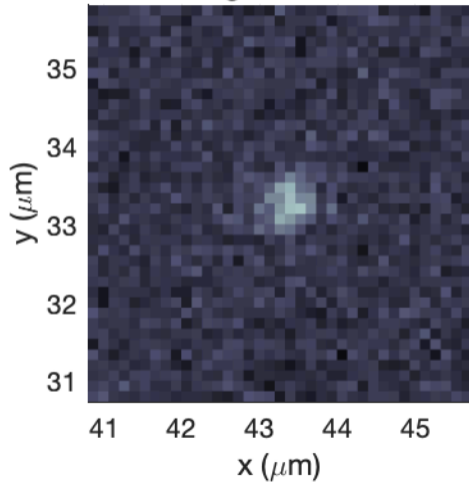**Horizontal line scans**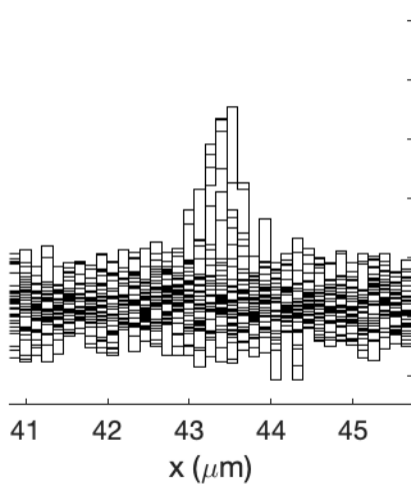**Vertical line scans**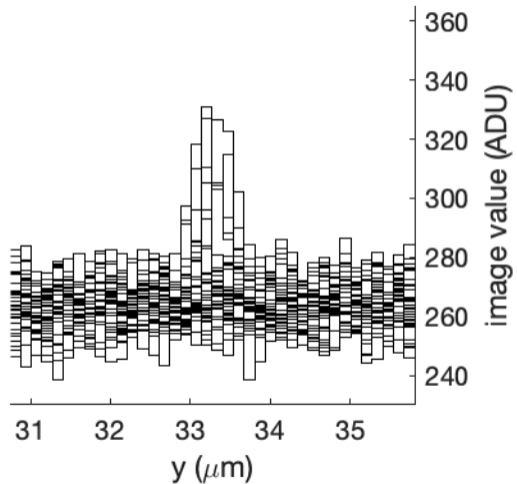

**Image frame 16**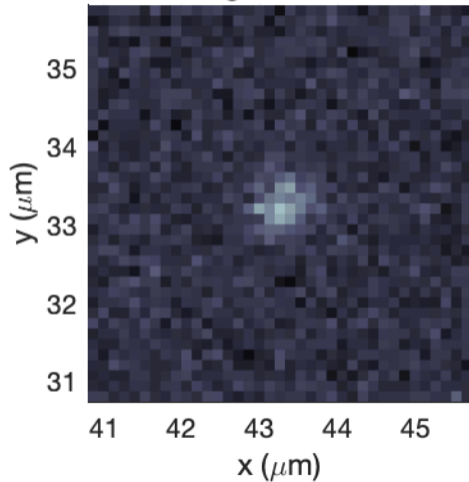**Horizontal line scans**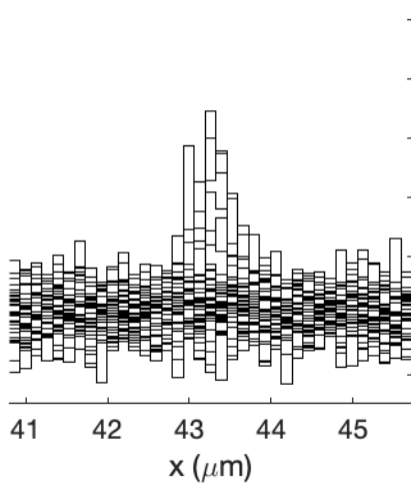**Vertical line scans**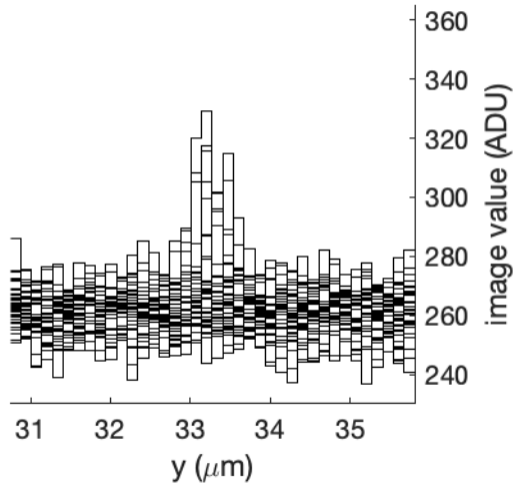



**Image frame 17**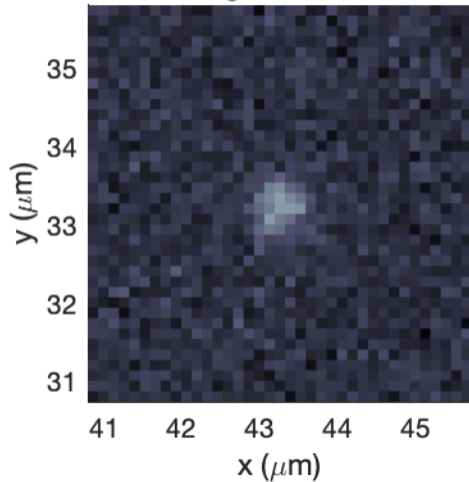**Horizontal line scans**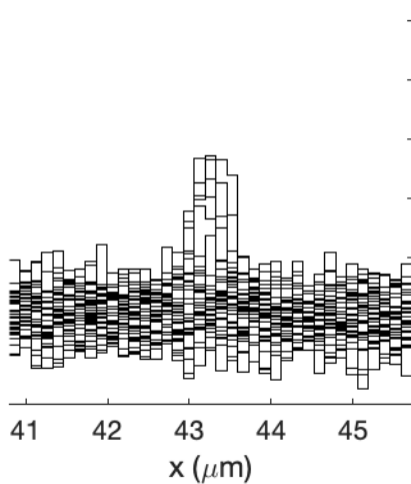**Vertical line scans**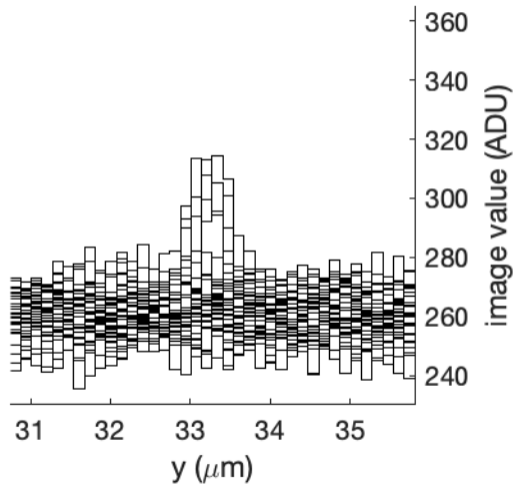

**Image frame 18**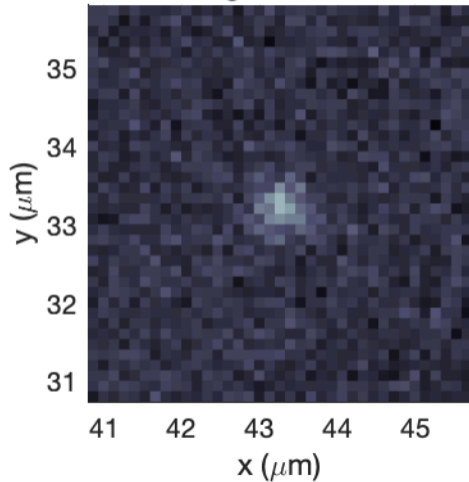**Horizontal line scans**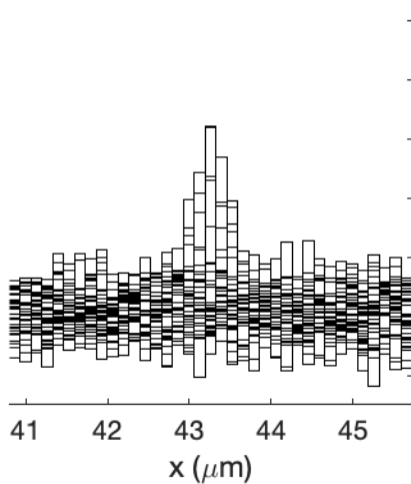**Vertical line scans**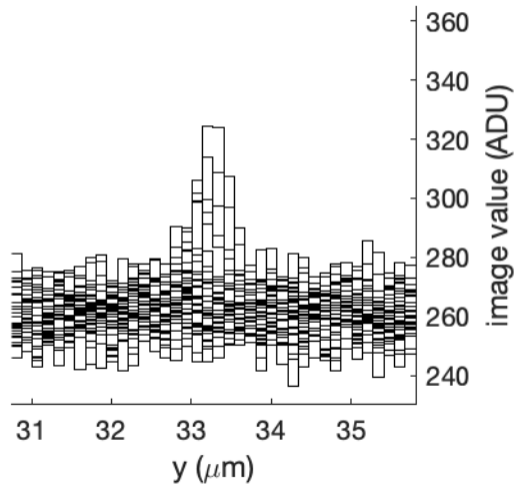

**Image frame 19**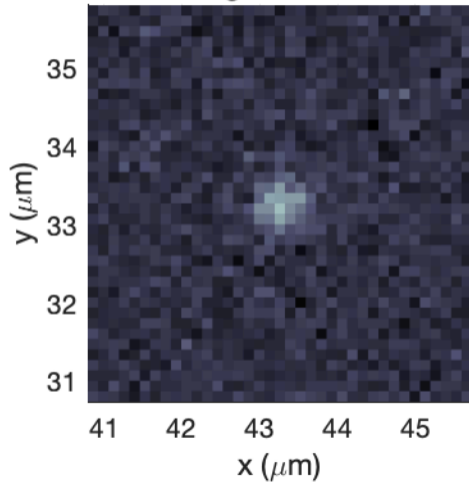**Horizontal line scans**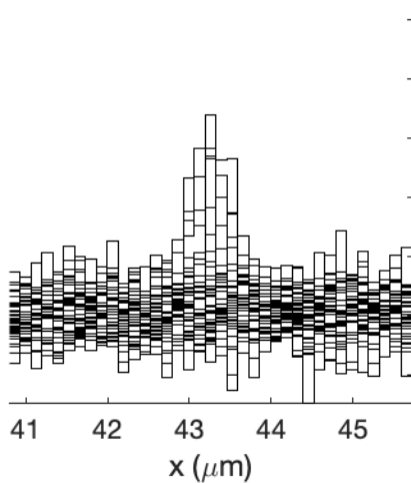**Vertical line scans**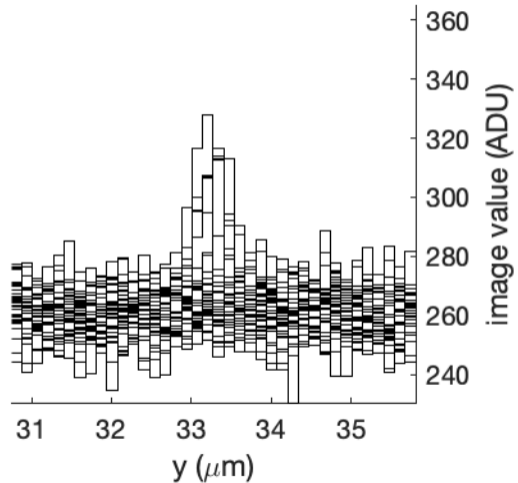

**Image frame 20**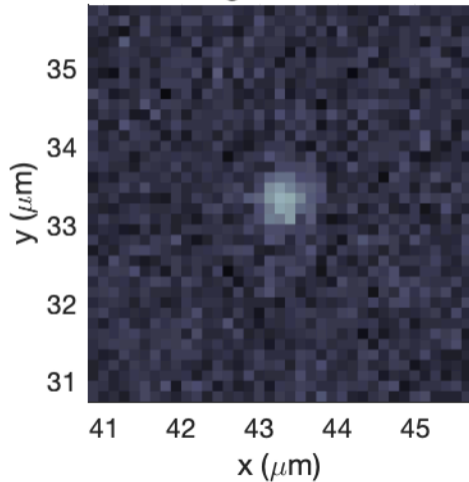**Horizontal line scans**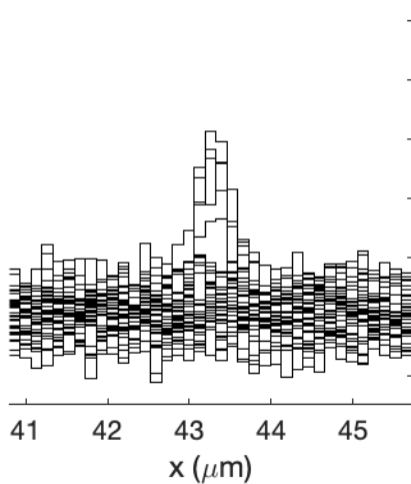**Vertical line scans**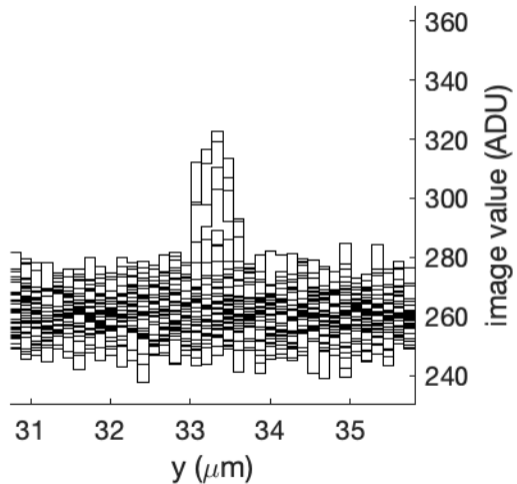

**Image frame 21**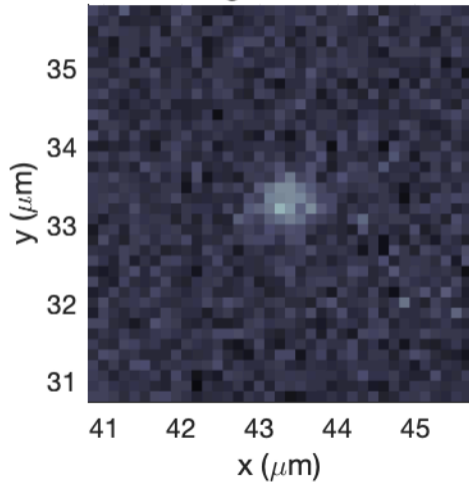**Horizontal line scans**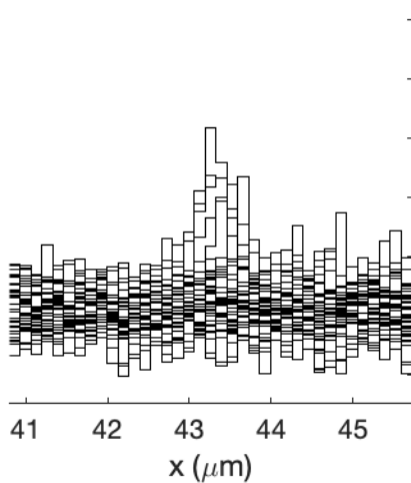**Vertical line scans**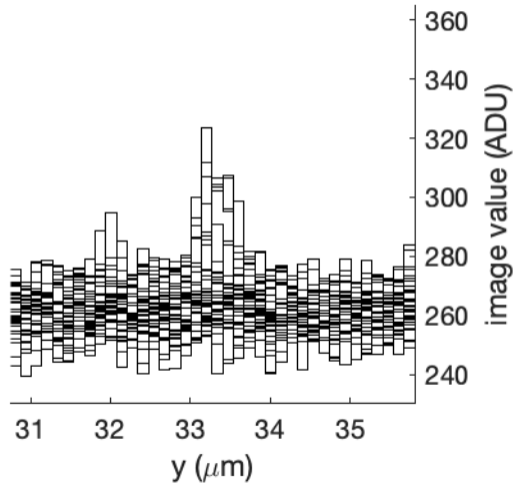

**Image frame 22**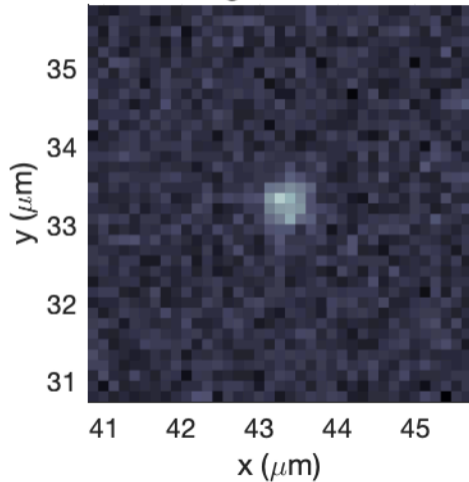**Horizontal line scans**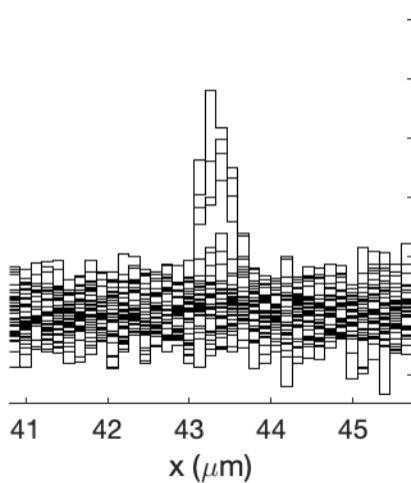**Vertical line scans**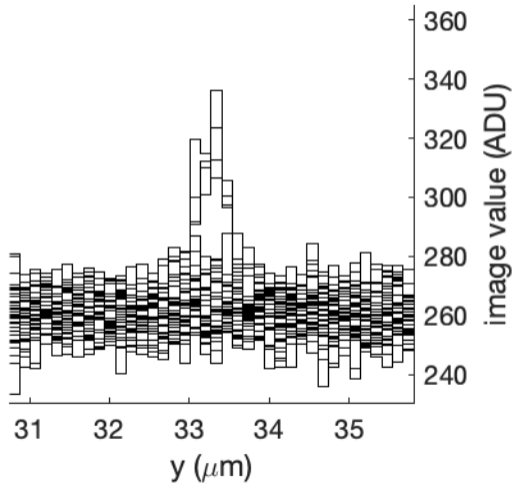

**Image frame 1**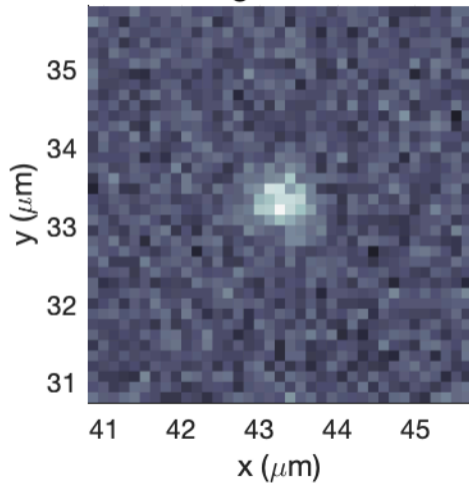**Horizontal line scans**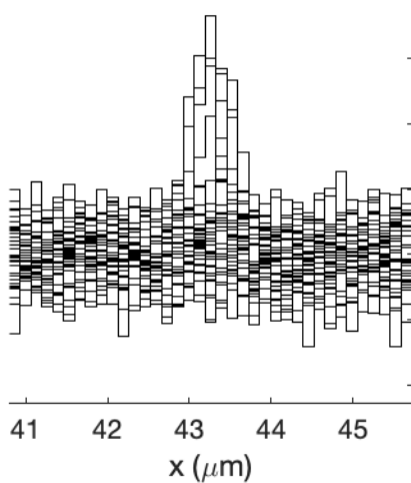**Vertical line scans**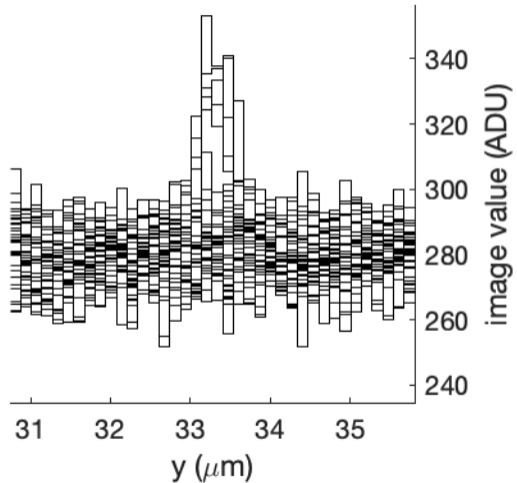

**Image frame 2**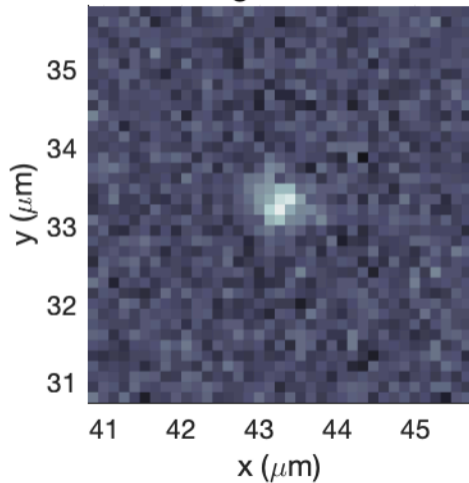**Horizontal line scans**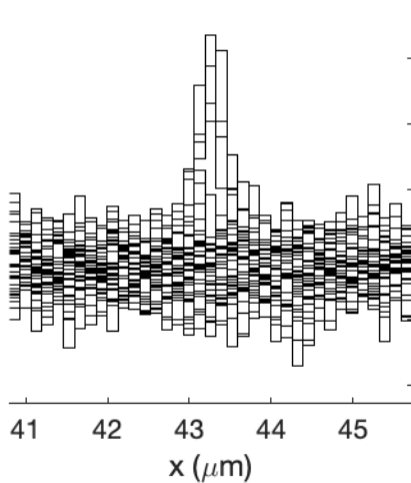**Vertical line scans**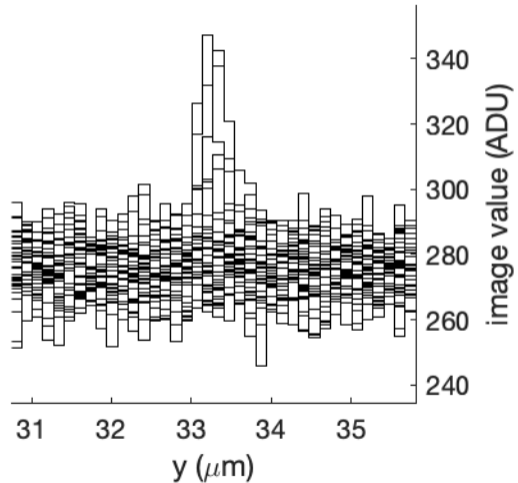



**Image frame 3**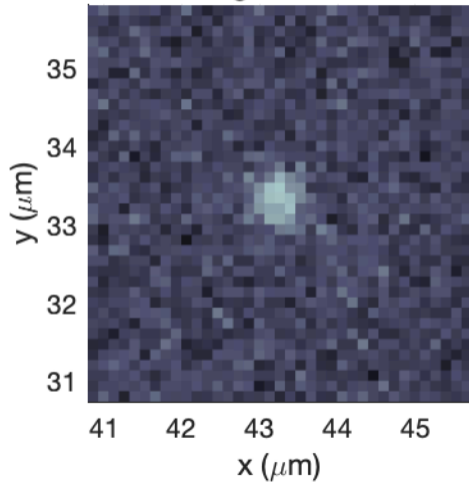**Horizontal line scans**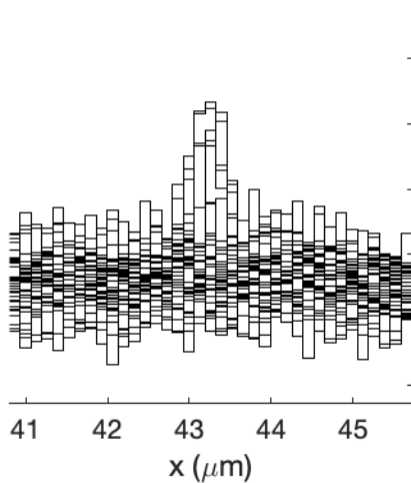**Vertical line scans**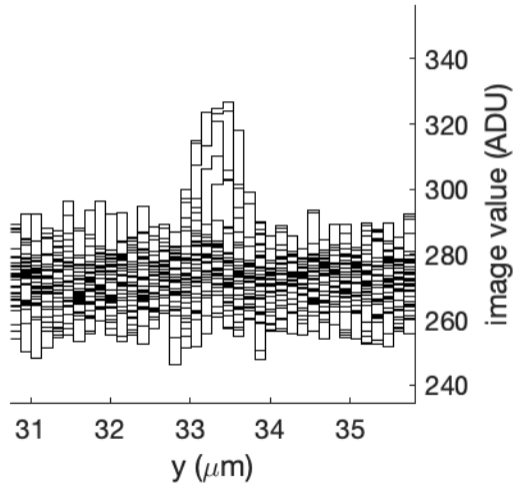

**Image frame 4**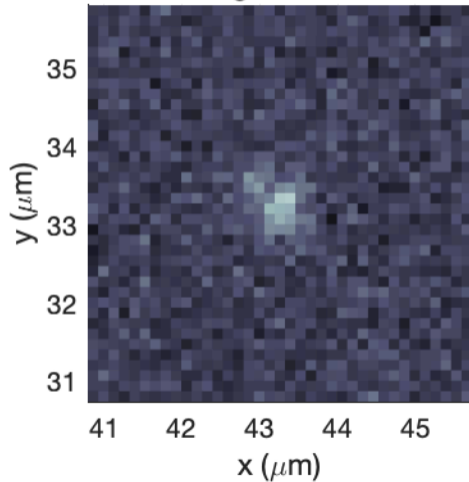**Horizontal line scans**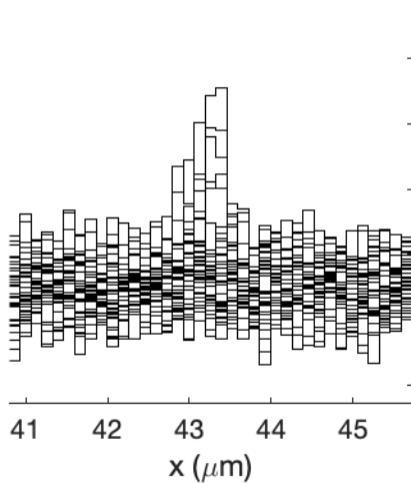**Vertical line scans**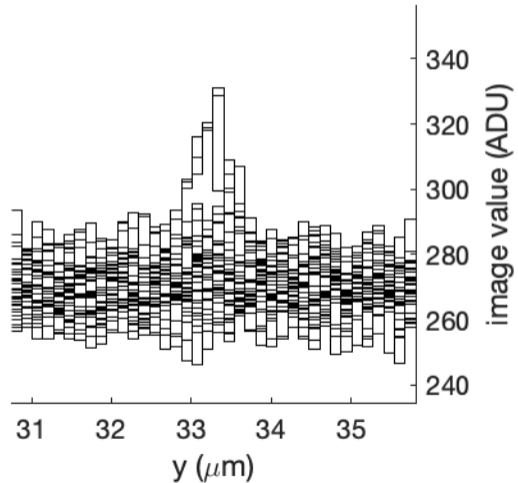

**Image frame 5**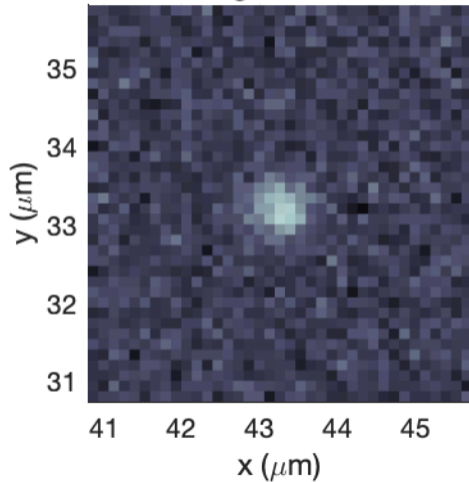**Horizontal line scans**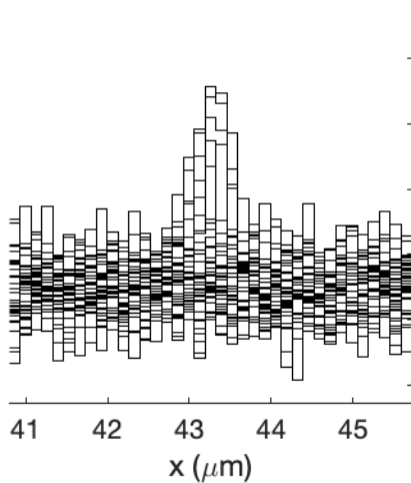**Vertical line scans**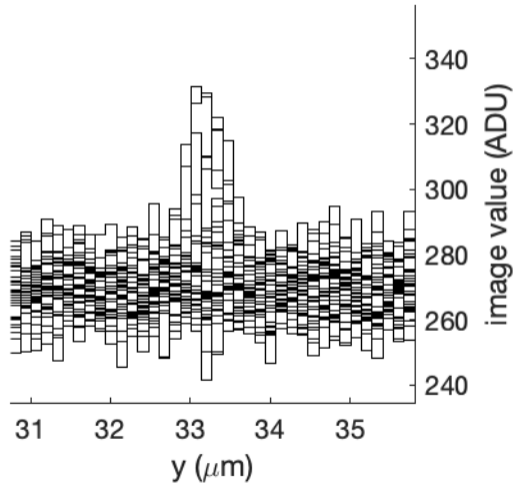

**Image frame 6**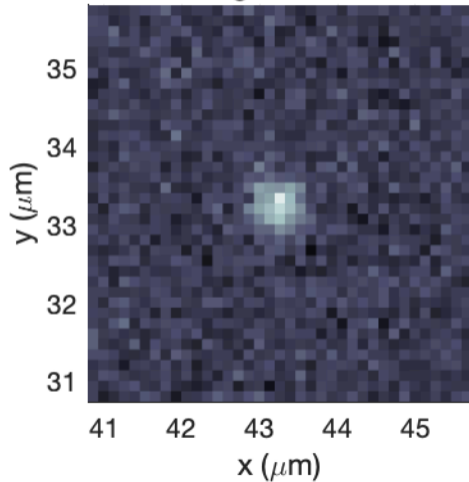**Horizontal line scans**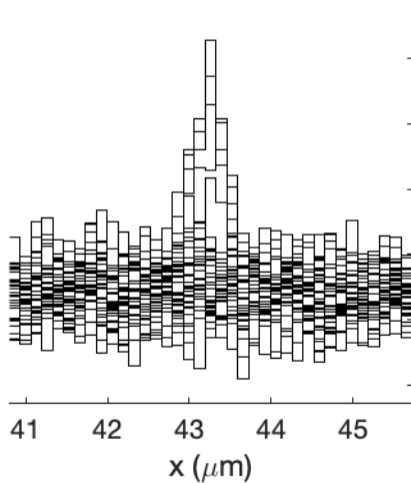**Vertical line scans**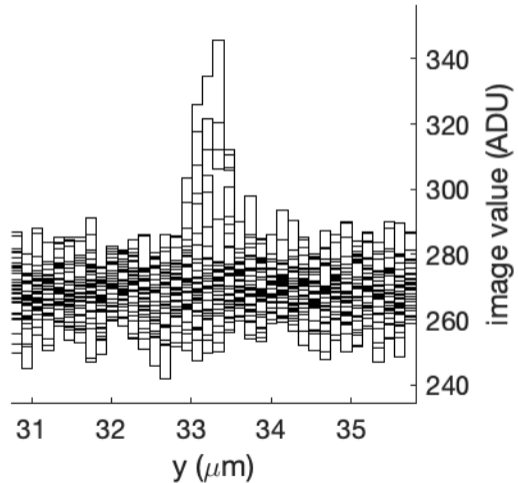

**Image frame 7**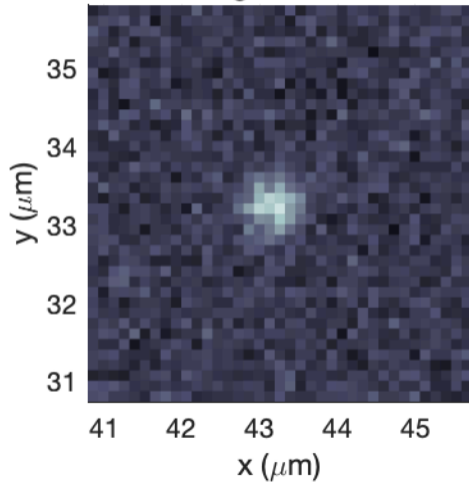**Horizontal line scans**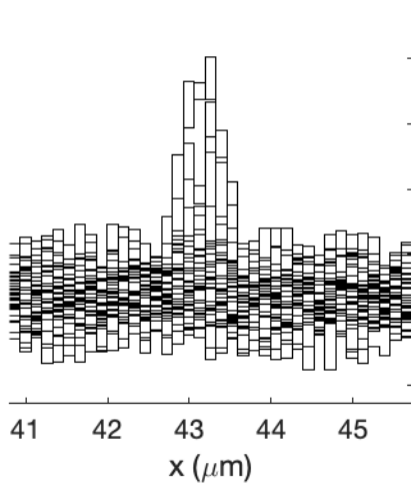**Vertical line scans**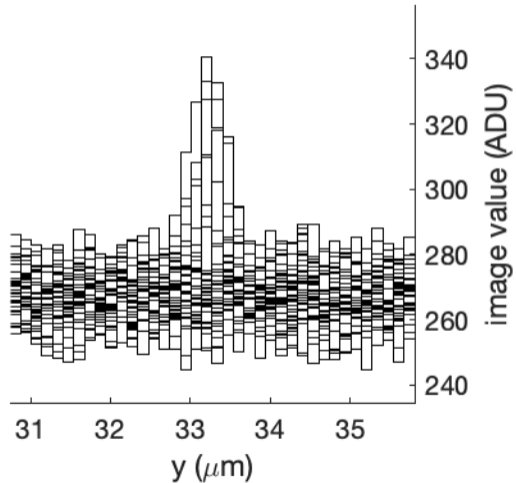

**Image frame 8**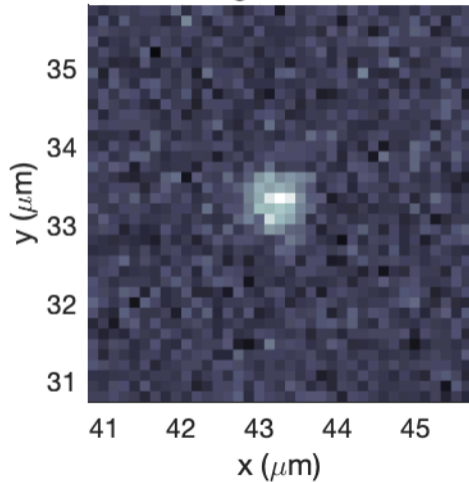**Horizontal line scans**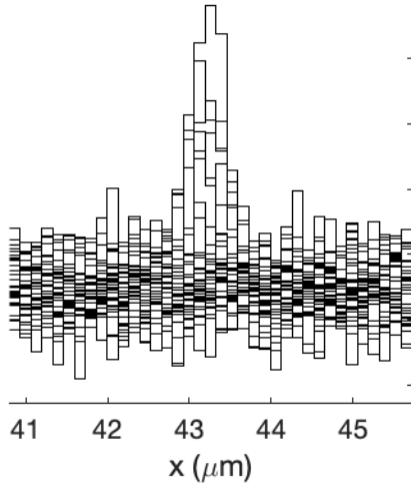**Vertical line scans**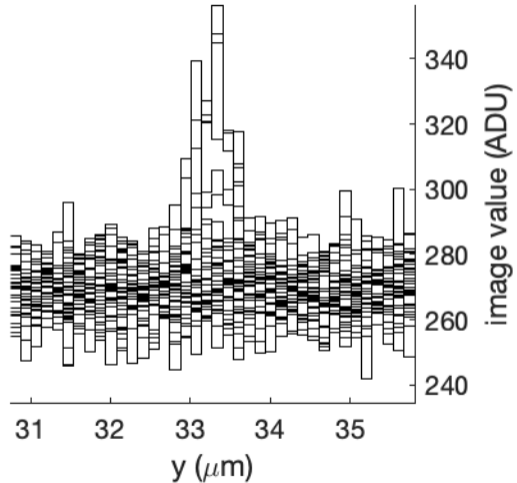

**Image frame 9**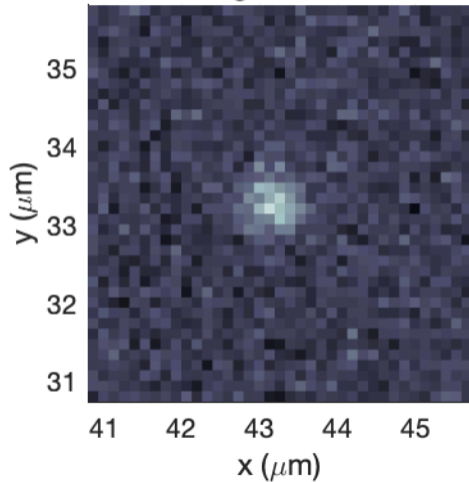**Horizontal line scans**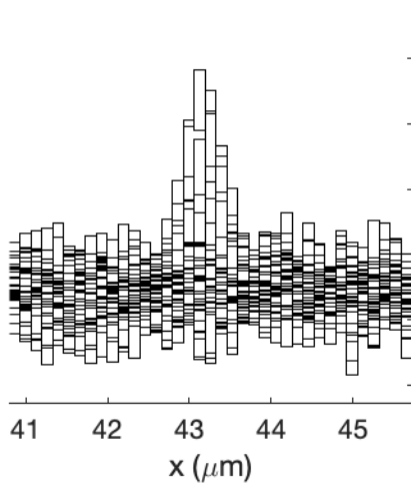**Vertical line scans**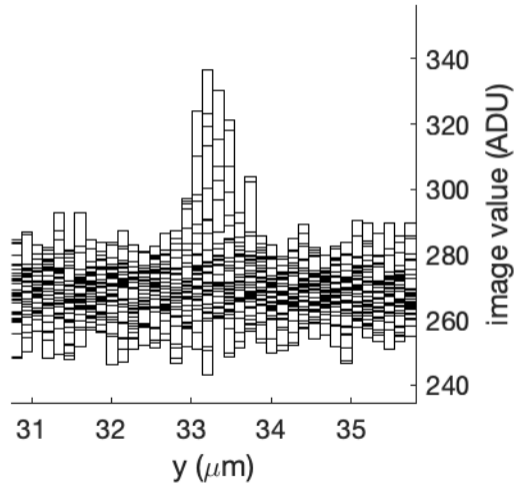

**Image frame 10**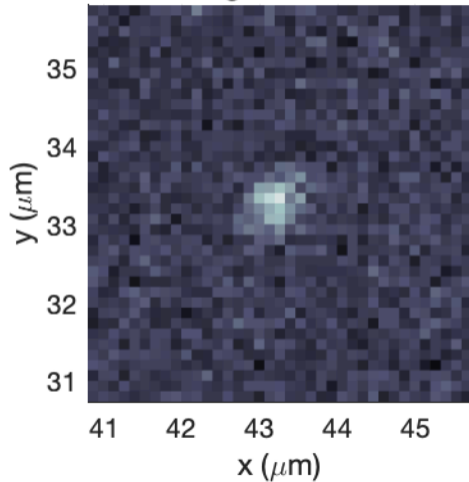**Horizontal line scans**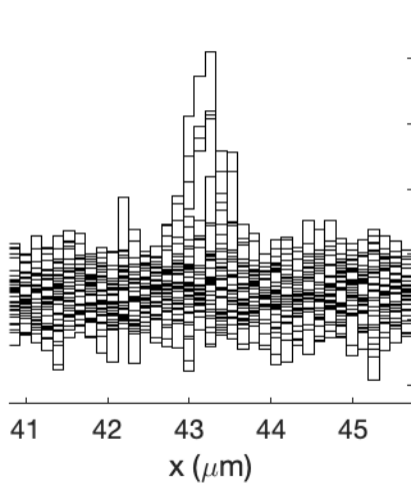**Vertical line scans**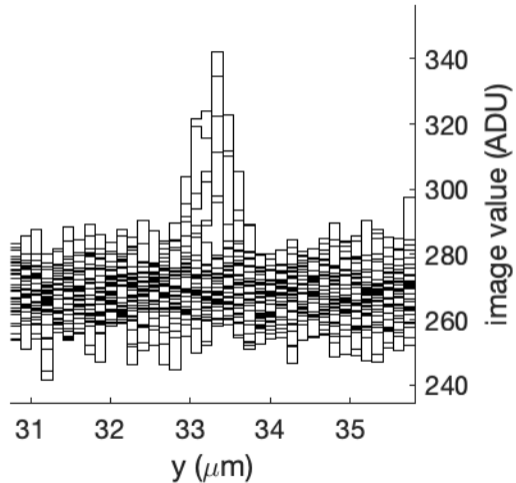



**Image frame 11**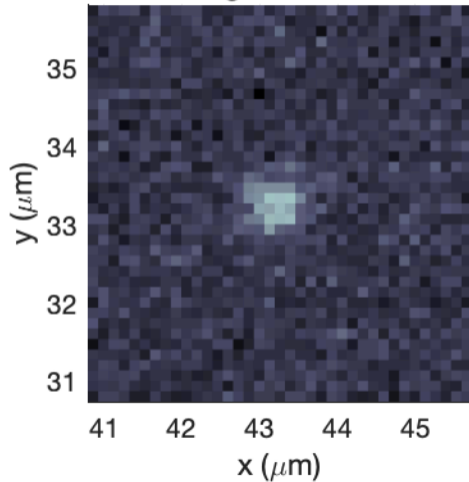**Horizontal line scans**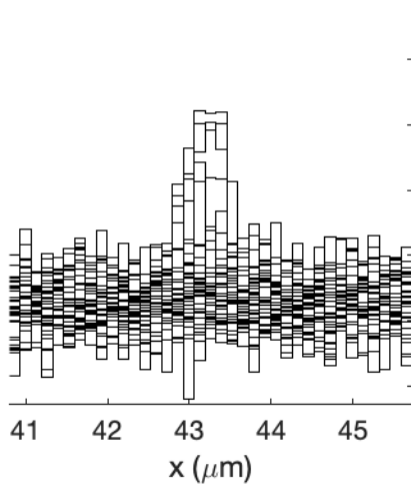**Vertical line scans**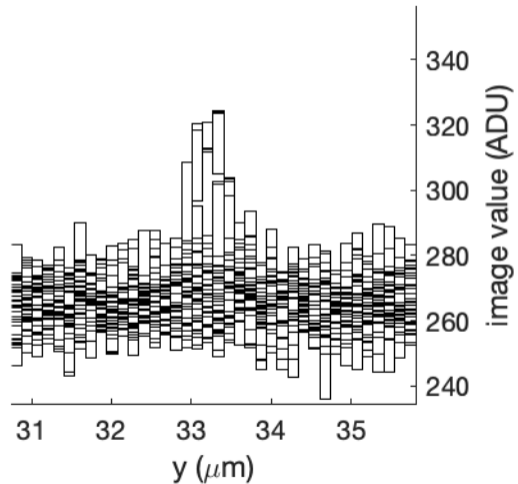

**Image frame 12**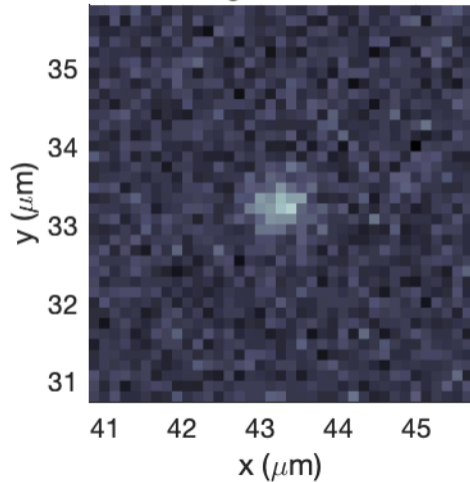**Horizontal line scans**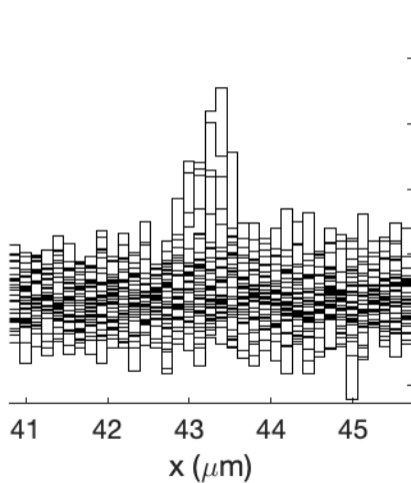**Vertical line scans**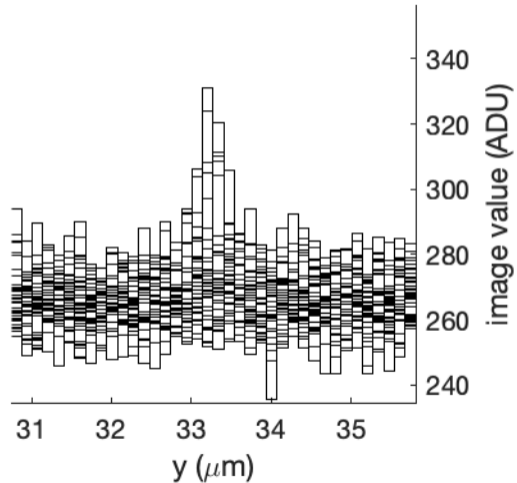

**Image frame 13**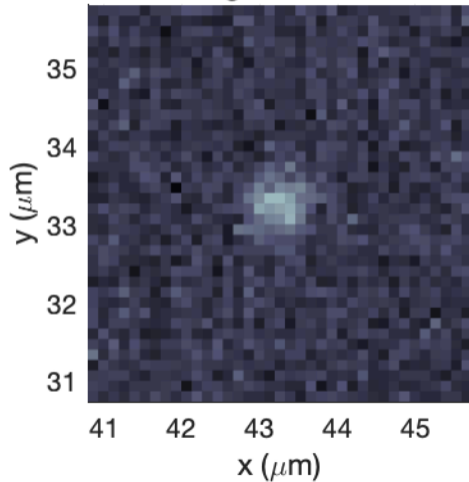**Horizontal line scans**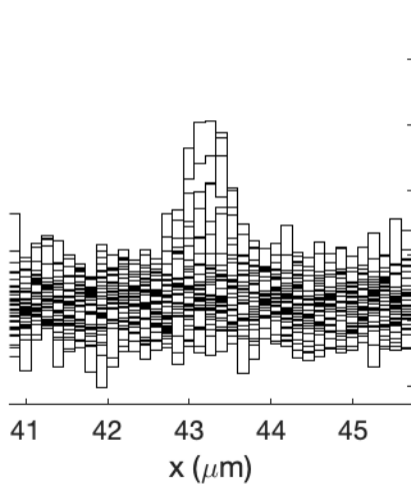**Vertical line scans**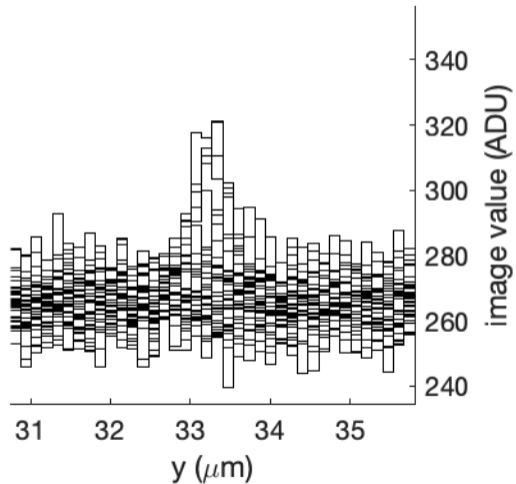

**Image frame 14**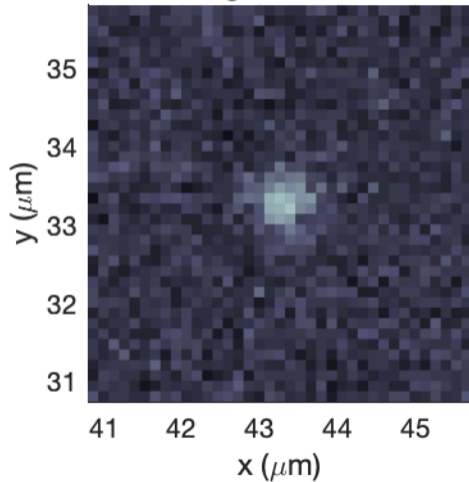**Horizontal line scans**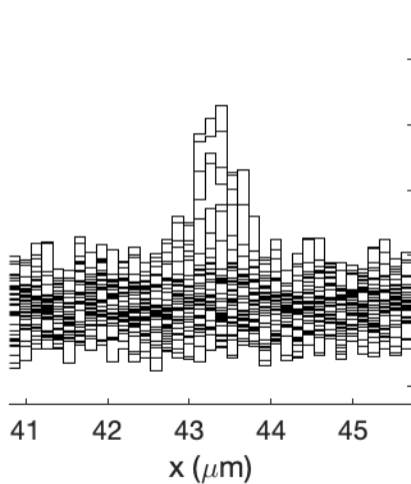**Vertical line scans**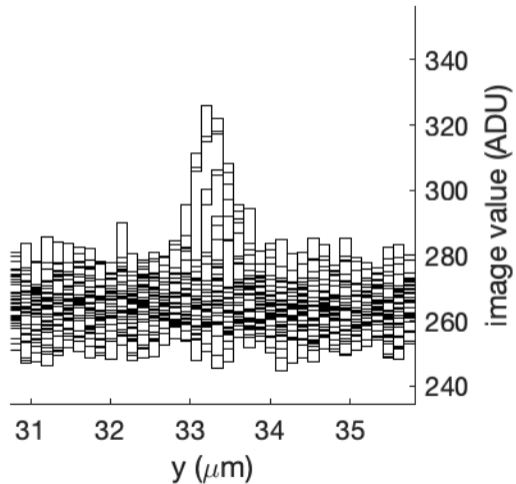

**Image frame 15**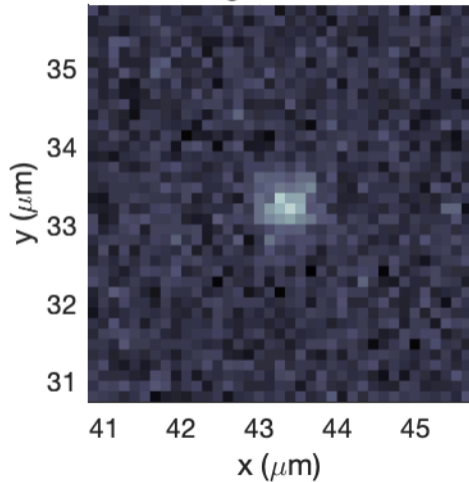**Horizontal line scans**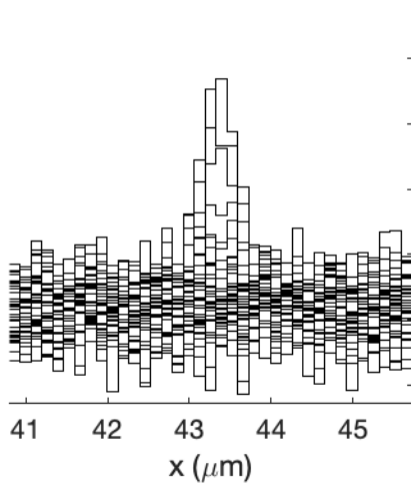**Vertical line scans**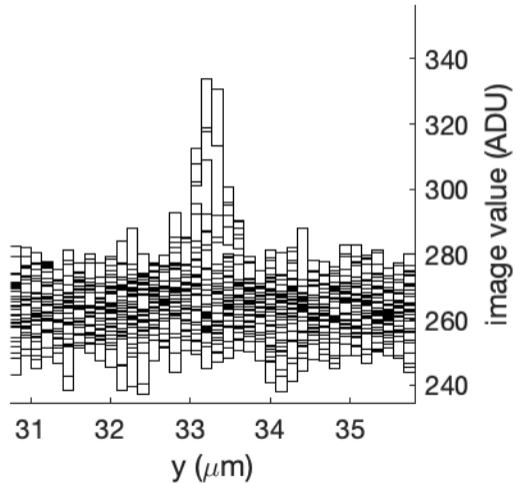

**Image frame 16**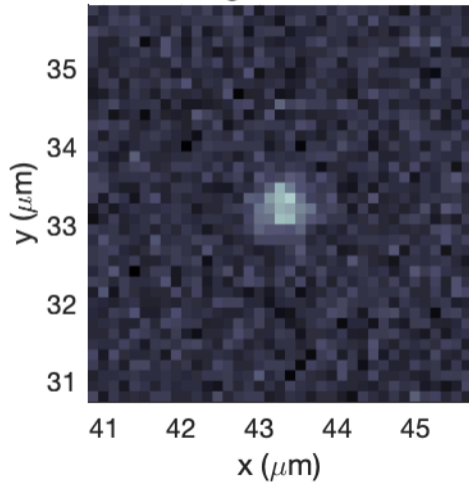**Horizontal line scans**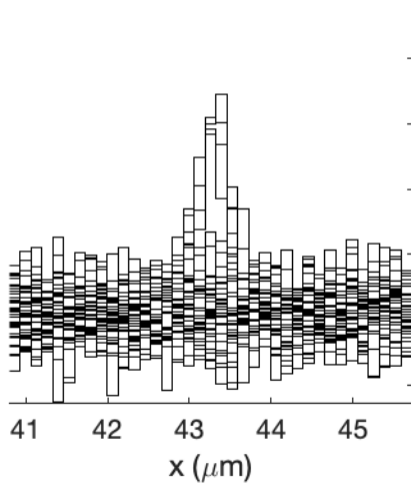**Vertical line scans**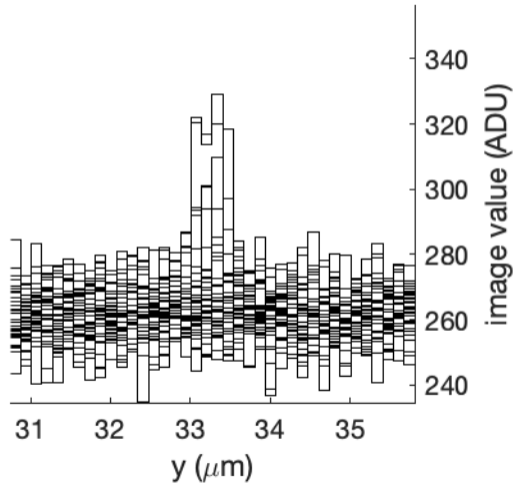

**Image frame 17**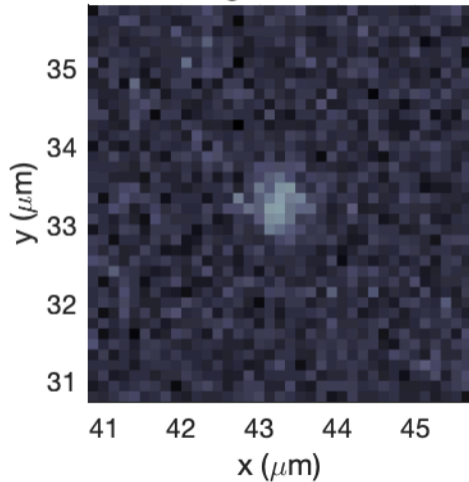**Horizontal line scans**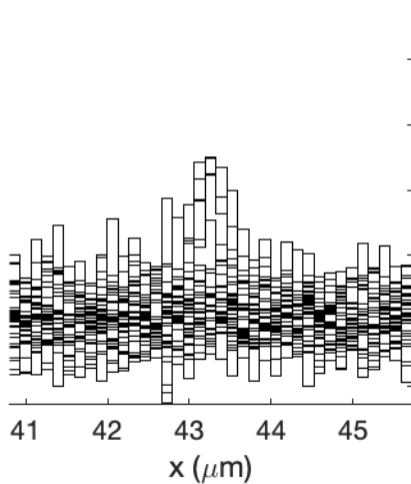**Vertical line scans**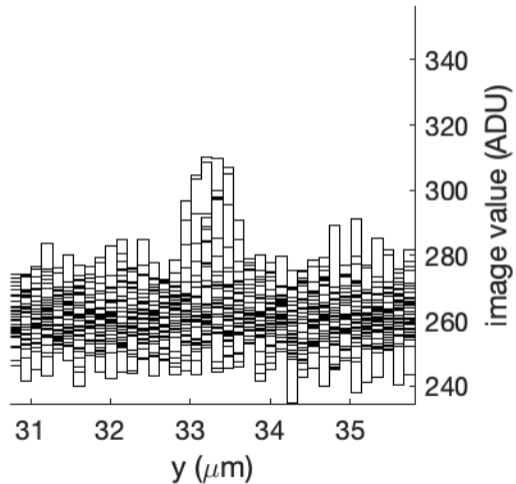

**Image frame 18**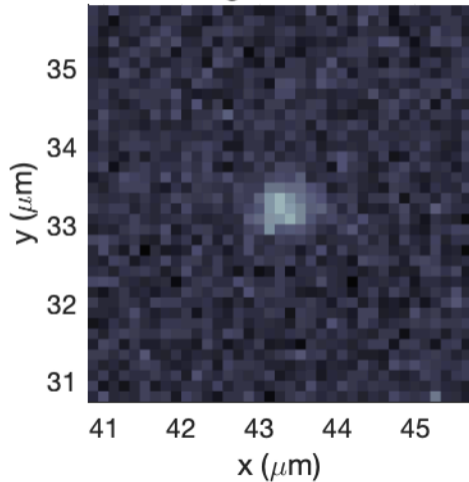**Horizontal line scans**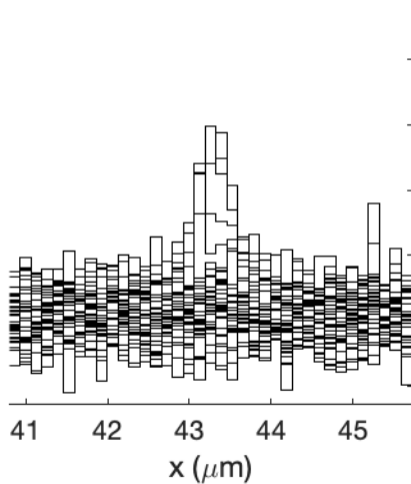**Vertical line scans**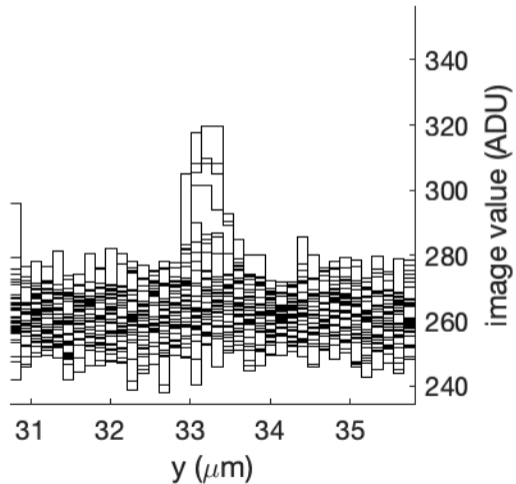



**Image frame 19**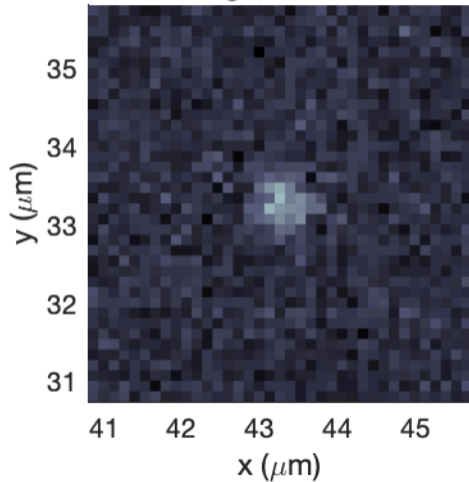**Horizontal line scans**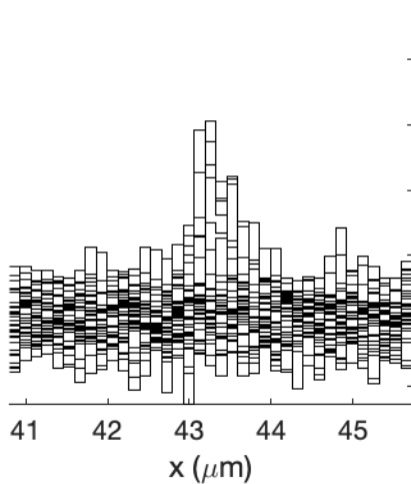**Vertical line scans**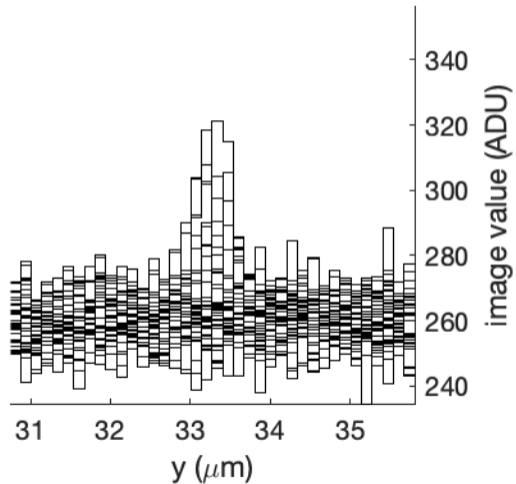

**Image frame 20**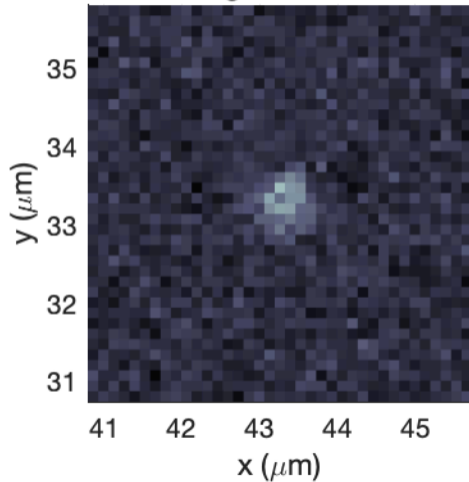**Horizontal line scans**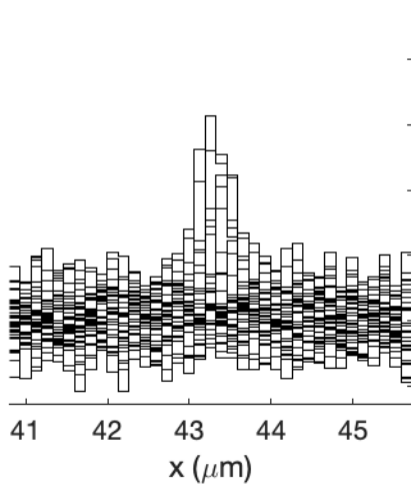**Vertical line scans**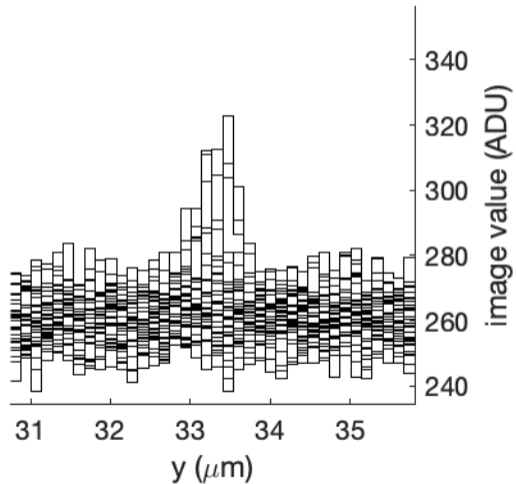

**Image frame 21**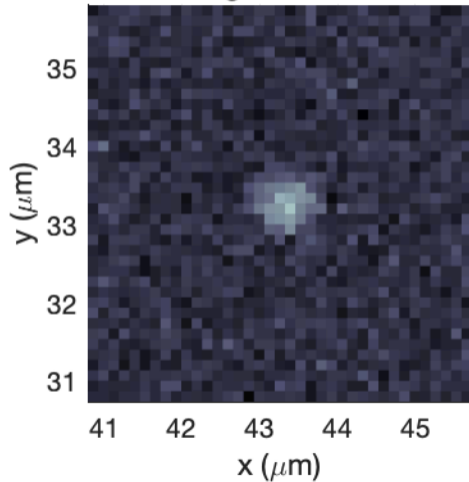**Horizontal line scans**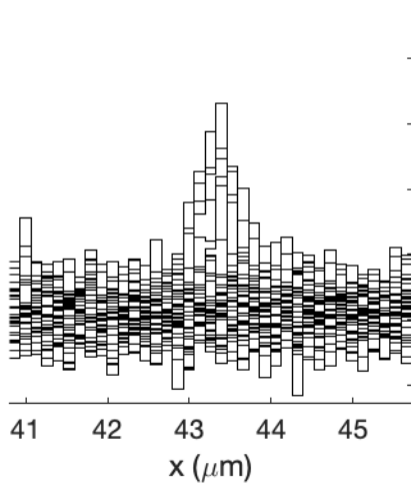**Vertical line scans**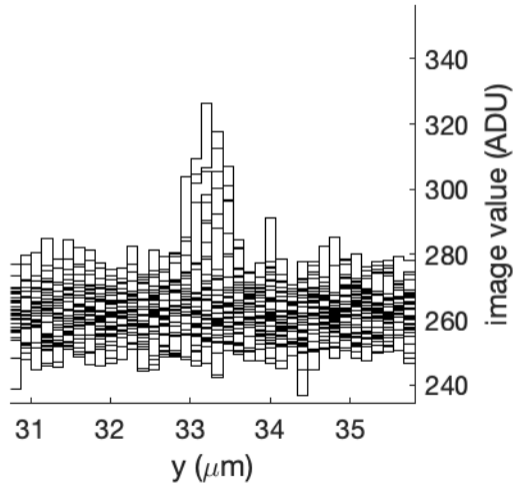

**Image frame 22**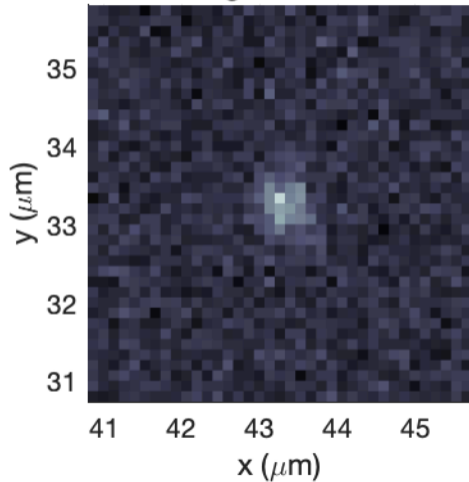**Horizontal line scans**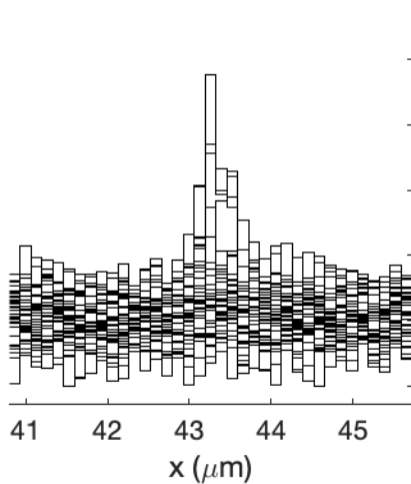**Vertical line scans**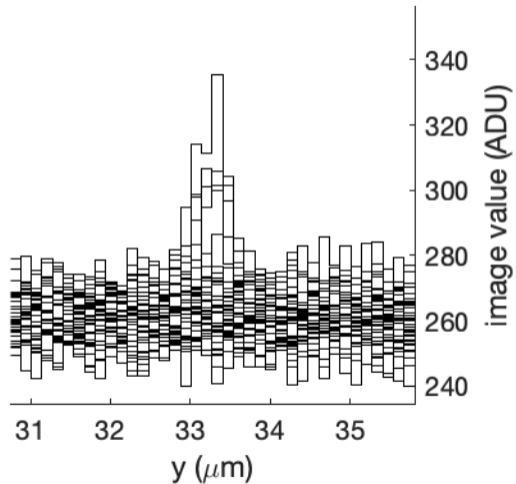

Supplement: 41592_2024_2349_MOESM7_ESM.pdf [file 41592_2024_2349_MOESM7_ESM.pdf]
